# Supplementary material
Source: PubMed Central journal article supplement (PMC3324620)

## SUPPORTING INFORMATION

### General Information:

All reactions were performed under an Ar atmosphere with stirring. The (*R,R*)-Ph-box ligand (**2**) and the 2,2'-methylenebis[(4*R*,5*S*)-4,5-diphenyl-2-oxazoline (**S-1**) were purchased from Aldrich. All other reagents were purchased from Aldrich or Acros. The MnO<sub>2</sub> used is <5 micron, 85%, from Aldrich. Solvents were purified using a solvent filtration system purchased from Contour Glass Co (Irvine, California). <sup>1</sup>H NMR spectra were recorded at 400 or 500 MHz using Varian instruments. <sup>13</sup>C NMR data were recorded at 75.5 MHz. Coupling constants (*J*) are in hertz. Abbreviations used are s = singlet, d = doublet, t = triplet, m = multiplet, bs = broad singlet, and dd = doublet of doublets, td = triplet of doublets, qd = quartet of doublets. IR spectra were taken neat using a Nicolet-Impact 420 FTIR. Wave numbers in cm<sup>-1</sup> are reported for characteristic peaks. High resolution mass spectra were obtained at SUNY, Buffalo's mass spec. facility on a ThermoFinnigan MAT XL spectrometer. Optical rotations were obtained using a JASCO P-2000 Polarimeter fitted with a micro cell with a 1 dm path length. Enantiomeric excess was determined by high-performance liquid chromatography (HPLC) using, Chiralpak AD-RH or Regis (*S,S*) Whelk-O 1 chiral analytical column (UV detection at 254 nm). Melting points were obtained on an electrothermal melting point apparatus and are reported uncorrected.

### Synthesis of Ligand:

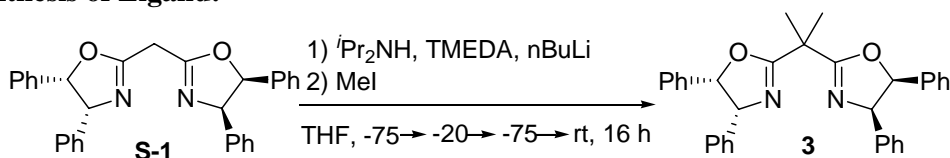

### 2,2-Bis[2-[4(*R*),5(*S*)-diphenyl-1,3-oxazolinyl]]propane (**3**)<sup>1</sup>

Alkylation of **S-1** was conducted following a procedure used by Denmark for similar substrates.<sup>2</sup> 2,2'-Methylenebis[(4*R*,5*S*)-4,5-diphenyl-2-oxazoline] (**S-1**) (1.00 g, 2.18 mmol) was dissolved in dry THF (67 mL) under an argon atmosphere. To this solution, diisopropylamine (0.31 mL, 0.22 g, 2.19 mmol) and *N,N,N,N*-tetramethylethylenediamine (0.66 mL, 0.51 g, 4.40 mmol) were added via syringe. The solution was then cooled to -70 °C in a 2-propanol/dry ice bath. Once cooled, *n*-butyl lithium (2.73 mL, 4.40 mmol, 1.6 M solution in hexanes), was added dropwise. After the addition the reaction mixture was warmed to -20 °C and allowed to stir for 30 min. The mixture was then cooled to -70 °C and iodomethane (0.28 mL, 0.64 g, 4.49 mmol) was added via syringe. The cold bath was removed and the reaction was allowed to proceed for an additional 16 h at rt. The reaction mixture was quenched with sat. NH<sub>4</sub>Cl (aq.) (75 mL) and then diluted with water (50 mL). The mixture was extracted with Et<sub>2</sub>O (3 x 100 mL) and the combined organic layers were dried over MgSO<sub>4</sub>, filtered, and the solvent was removed *in vacuo*. Flash chromatography of the resulting crude solid on SiO<sub>2</sub> (50% v/v EtOAc in hexanes) afforded the (4*R*,5*S*)-di-Ph-box ligand **3** (1.04 g, 2.14 mmol) in 89% yield. <sup>1</sup>H NMR (400 MHz, CDCl<sub>3</sub>): δ 7.02 (s, 10H), 6.96 (s, 10H), 5.97 (d, 10.0 Hz, 2H), 5.59 (d, 10.4 Hz, 2H), 1.92 (s, 6H) <sup>13</sup>C NMR (75.5 MHz, CDCl<sub>3</sub>): δ 170.4, 137.5, 136.2, 127.9, 127.6, 127.4 (2 signals overlapped), 126.9, 126.6, 86.3, 73.8, 39.6, 24.8; IR (neat): 3029, 2924, 1656, 1496, 1454, 1143, 1114, 975, 697 cm<sup>-1</sup>; HRMS (ESI) calcd for [M+H]<sup>+</sup> C<sub>33</sub>H<sub>31</sub>O<sub>2</sub>N<sub>2</sub> 487.2380, found 487.2374.

### Synthesis of arylsulfonylchloride:

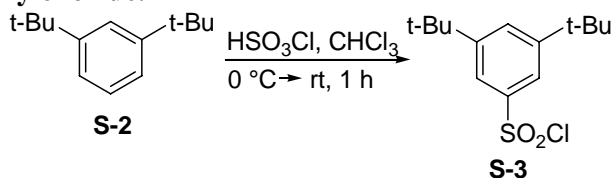

### 3,5-Di-*tert*-butylbenzenesulfonyl chloride (**S-3**)<sup>3</sup>

The known sulfonyl chloride **S-3** was synthesized as reported by Huntress.<sup>3</sup>

3,5-Di-*tert*-butylbenzene (0.58 mL, 0.50 g, 2.6 mmol) was dissolved in CHCl<sub>3</sub> (2.5 mL) at 0 °C with stirring. To the solution chlorosulfonic acid (2.45 mL, 4.29 g, 36.8 mmol) was added cautiously, dropwise, and the solution was allowed to stir for 30 min. The reaction was warmed to rt and allowed to stir for an additional 30 min. The mixture was then poured over crushed ice and the organic layer separated. The aqueous layer was then extracted with CHCl<sub>3</sub> (2 x 10 mL), and the organics were pooled. The combined organics were washed with cold water (25 mL), dried over Na<sub>2</sub>SO<sub>4</sub>, filtered, and the solvent removed *in vacuo*. Flash chromatography of the resulting crude solid on SiO<sub>2</sub> (0-20% v/v CH<sub>2</sub>Cl<sub>2</sub> in hexanes gradient) afforded 3,5-di-*tert*-butylbenzenesulfonyl chloride (**S-3**) in 53% yield (unoptimized). <sup>1</sup>H NMR (400 MHz, CDCl<sub>3</sub>): δ 7.84 (s, 2H), 7.78 (s, 1H), 1.38 (s, 18H).

### Synthesis of 2-allylaniline substrates:

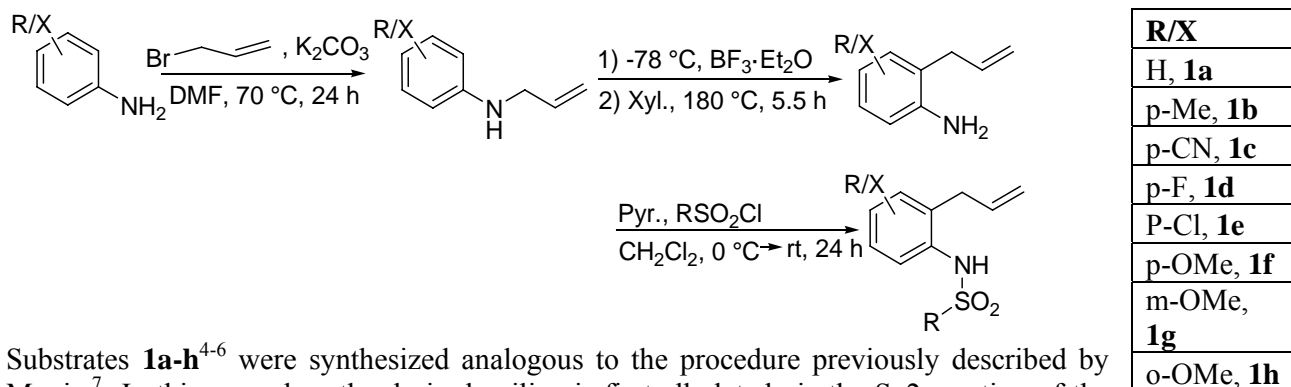

Substrates **1a-h**<sup>4-6</sup> were synthesized analogous to the procedure previously described by Muniz.<sup>7</sup> In this procedure the desired aniline is first alkylated via the S<sub>N</sub>2 reaction of the aniline and allyl bromide. The N-allylaniline is then converted to the o-allylaniline via a 3,3'-sigmatropic rearrangement, facilitated by BF<sub>3</sub>·Et<sub>2</sub>O, in a sealed vessel at 180°C. Lastly, the o-allylaniline was sulfonated by treatment with the desired sulfonyl chloride under basic conditions. *N*-(2-Allyl-phenyl)-4-methyl-benzenesulfonamide (**1a**)<sup>5</sup> was obtained from tosylation of 2-allylaniline.<sup>8</sup> *N*-(2-Allyl-4-methyl-phenyl)-4-methyl-benzenesulfonamide (**1b**)<sup>6</sup> was obtained from tosylation of 4-methyl-2-allylaniline. *N*-(2-Allyl-4-cyano-phenyl)-4-methyl-benzenesulfonamide (**1c**)<sup>4</sup> was obtained from tosylation of 4-cyano-2-allylaniline.<sup>7</sup> *N*-(2-Allyl-4-fluoro-phenyl)-4-methyl-benzenesulfonamide (**1d**)<sup>6</sup> was obtained from tosylation of 4-fluoro-2-allylaniline. *N*-(2-Allyl-4-chloro-phenyl)-4-methyl-benzenesulfonamide (**1e**)<sup>6</sup> was obtained by tosylation of 2-allyl-4-chloro-phenylamine.<sup>7</sup> *N*-(2-Allyl-4-methoxy-phenyl)-4-methyl-benzenesulfonamide (**1f**)<sup>6</sup> was obtained from tosylation of 4-methoxy-2-allylaniline. *N*-(2-Allyl-5-methoxy-phenyl)-4-methyl-benzenesulfonamide (**1g**)<sup>4</sup> was obtained from tosylation of 5-methoxy-2-allylaniline.<sup>9</sup> *N*-(2-Allyl-phenyl)-4-nitro-benzenesulfonamide<sup>10</sup> (**1j**) was synthesized as previously reported from the sulfonylation of 2-allylaniline.<sup>6</sup> *N*-(2-Allyl-phenyl)-methyl-sulfonamide (**1k**)<sup>5</sup> was synthesized as previously reported from the sulfonylation of 2-allylaniline.<sup>6</sup>

### *N*-(2-Allyl-6-methoxy-phenyl)-4-methyl-benzenesulfonamide (**1h**)

The sulfonamide **1h** (0.3200 g, 1.01 mmol) was obtained in 76% yield from tosylation of 6-methoxy-2-allylaniline<sup>11</sup> (0.2179 g, 1.34 mmol). mp = 117-119 °C; <sup>1</sup>H NMR (500 MHz, CDCl<sub>3</sub>): δ 7.49 (d, J = 8.0 Hz, 2H), 7.18-7.11 (m, 3H), 6.89 (d, J = 8.0 Hz, 1H), 6.48 (d, J = 8.5 Hz, 1H), 6.20 (s, 1H), 5.98-5.93 (m, 1H), 5.14-5.07 (m, 2H), 3.74 (d, J = 6.5 Hz, 2H), 3.15 (s, 3H), 2.38 (s, 3H); <sup>13</sup>C NMR (75.5 MHz, CDCl<sub>3</sub>): δ 154.2, 143.1, 140.9, 136.9, 136.7, 128.7, 128.1, 127.5, 122.8, 122.3, 116.1, 108.1, 54.7, 35.8, 21.4; IR (neat): 3274, 3076, 2973, 1640, 1590, 1473, 1333, 1272, 1162, 1080, 911 cm<sup>-1</sup>; HRMS (ESI) calcd for [M+1]<sup>+</sup> C<sub>17</sub>H<sub>20</sub>O<sub>3</sub>NS 318.1158, found 318.1152.

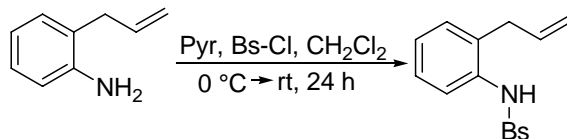

### ***N*-(2-allylphenyl)benzene sulfonamide (**1i**)**

The procedure for the synthesis of substrate **1i** was the same as stated above except that the solution was treated with benzenesulfonyl chloride. Sulfonamide **1i** (1.40 g, 5.00 mmol) was obtained from sulfonylation of 2-allylaniline<sup>8</sup> (1.00 g, 7.50 mmol) as a light brown solid in 66% yield (unoptimized). mp = 84-85 °C; <sup>1</sup>H NMR (400 MHz, CDCl<sub>3</sub>): δ 7.72-7.70 (m, 2H), 7.57-7.54 (m, 1H), 7.46-7.41 (m, 3H), 7.24-7.20 (m, 1H), 7.15-7.11 (m, 1H), 7.07 (d, J = 8.0 Hz, 1H), 6.53 (bs, 1H), 5.81-5.73 (m, 1H), 5.11 (dd, J = 1.2, 10.0 Hz, 1H), 4.94 (dd, J = 1.6, 17.2 Hz, 1H), 2.98 (d, J = 6.4 Hz, 2H); <sup>13</sup>C NMR (75.5 MHz, CDCl<sub>3</sub>): δ 139.7, 135.6, 134.8, 132.9, 132.2, 130.5, 129.0, 127.7, 127.0, 126.5, 124.7, 117.1, 36.1; IR (neat): 3281, 3067, 2913, 1637, 1583, 1491, 1447, 1393, 1330, 1162, 1091, 918 cm<sup>-1</sup>; HRMS (ESI) calcd for [M+1]<sup>+</sup> C<sub>15</sub>H<sub>16</sub>O<sub>2</sub>NS 274.0896, found 274.0899.

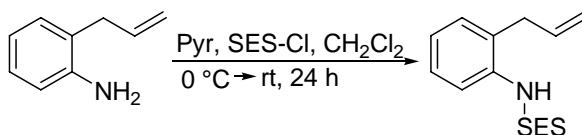

### ***N*-(2-allylphenyl)-2-(trimethylsilyl)ethane sulfonamide (**1l**)**

The procedure for the synthesis of substrate **1l** was the same as stated above except that the solution was treated with 2-(trimethylsilyl)ethanesulfonyl chloride. Sulfonamide **1l** (0.30 g, 1.00 mmol) was obtained from sulfonylation of 2-allylaniline<sup>8</sup> (0.25 g, 1.90 mmol) as a dark red oil in 55% yield (unoptimized). <sup>1</sup>H NMR (400 MHz, CDCl<sub>3</sub>): δ 7.47 (d, J = 7.6 Hz, 1H), 7.26-7.20 (m, 2H), 7.15 (d, J = 7.2 Hz, 1H), 6.28 (bs, 1H), 6.01-5.91 (m, 1H), 5.19 (dd, J = 1.6, 10.0 Hz, 1H), 5.09 (dd, J = 1.6, 17.2 Hz, 1H), 3.44 (d, J = 5.6 Hz, 2H), 3.07-3.03 (m, 2H), 1.07-1.03 (m, 2H), 0.01 (s, 9H); <sup>13</sup>C NMR (75.5 MHz, CDCl<sub>3</sub>): δ 135.6, 135.4, 130.8, 127.8, 125.6, 123.5, 122.0, 117.1, 48.7, 36.3, 10.4, -2.1; IR (neat): 3279, 3077, 2954, 1638, 1585, 1494, 1407, 1330, 1252, 1148, 918, 860, 840, 754, 698 cm<sup>-1</sup>; HRMS (ESI) calcd for [M+Na]<sup>+</sup> C<sub>14</sub>H<sub>23</sub>O<sub>2</sub>NSSiNa 320.1111, found 320.1115.

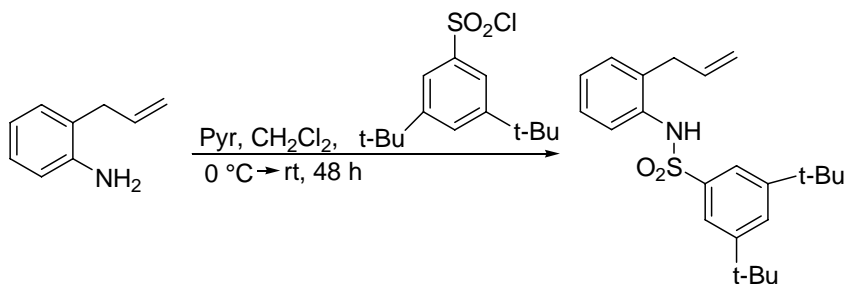

### ***N*-(2-allylphenyl)-3,5-di-*tert*-butylbenzenesulfonamide (**1m**)**

The procedure for the synthesis of substrate **1m** was the same as stated above except that the solution was treated with 3,5-di-*tert*-butylbenzenesulfonyl chloride<sup>3</sup> and the reaction time was prolonged to 48 h. Sulfonamide **1m** (0.36 g, 0.93 mmol) was obtained from sulfonylation of 2-allylaniline<sup>8</sup> (0.14 g, 1.04 mmol) as a pale brown solid in 90% yield. mp = 132 – 133 °C; <sup>1</sup>H NMR (400 MHz, CDCl<sub>3</sub>): δ 7.57 (s, 1H), 7.51 (d, J = 7.6 Hz, 1H), 7.44 (s, 1H), 7.27-7.24 (m, 2H), 7.13 (t, J = 7.2 Hz, 1H), 7.02 (d, J = 8.0 Hz, 1H), 6.41 (bs, 1H), 5.67-5.63 (m, 1H), 5.07 (dd, J = 1.6, 10.0 Hz, 1H), 4.88 (dd, J = 1.2, 17.2 Hz, 1H), 2.74 (d, J = 6.0 Hz, 2H), 1.23 (s, 18H); <sup>13</sup>C NMR (75.5 MHz, CDCl<sub>3</sub>): δ 152.1, 138.5, 135.5, 135.2, 132.5, 130.3, 127.8, 126.8, 126.6, 125.7, 121.1, 117.0, 35.9, 35.1, 31.1; IR (neat): 3266, 3076, 2958, 1596, 1483, 1333, 1166 cm<sup>-1</sup>; HRMS (ESI) calcd for [M+1]<sup>+</sup> C<sub>23</sub>H<sub>32</sub>O<sub>2</sub>NS 386.2148, found 386.2141.

### Synthesis of 4-pentenylsulfonamide substrates:

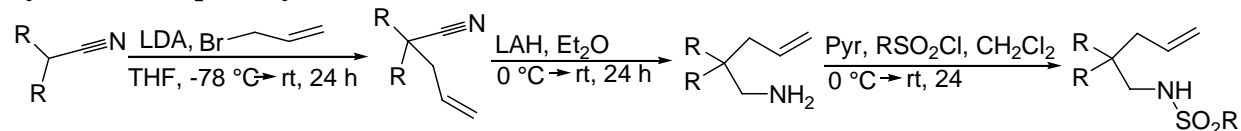

Substrates **7a-d**, **11**<sup>12-15</sup> were synthesized according to the procedures previously reported by Bender and Tamaru.<sup>12-15</sup> *N*-(2, 2-Dimethyl-pent-4-enyl)-4-methyl-benzenesulfonamide (**7a**)<sup>12</sup> was obtained from sulfonylation of 2,2-dimethyl-pent-4-enylamine<sup>13</sup> with tosyl chloride. *N*-(2, 2-Dimethyl-pent-4-enyl)-methyl-sulfonamide (**7b**)<sup>16</sup> was obtained from sulfonylation of 2,2-dimethyl-pent-4-enylamine<sup>13</sup> with methane sulfonyl chloride. *N*-(2, 2-Dimethyl-pent-4-enyl)-4-nitro-benzenesulfonamide (**7c**)<sup>17</sup> was obtained from sulfonylation of 2,2-dimethyl-pent-4-enylamine<sup>13</sup> with 4-nitro-benzenesulfonyl chloride. *N*-(2, 2-Diphenyl-pent-4-enyl)-4-methyl-benzenesulfonamide (**7d**)<sup>14</sup> was obtained from sulfonylation of 2,2-diphenyl-pent-4-enylamine<sup>13</sup> with tosyl chloride. *N*-(2,2,4-trimethyl-pent-4-enyl)- 4-Methyl-benzenesulfonamide (**11**)<sup>15</sup> was obtained from sulfonylation of 2,2,4-trimethyl-pent-4-enylamine with tosyl chloride. *N*-(5-allyl-2,2-di-tert-butyl-[1,3,2]dioxasilinan-5-ylmethyl)-4-methyl-benzenesulfonamide (**7g**)<sup>4</sup> was synthesized by the procedure previously reported by Fuller.<sup>4</sup> *N*-(Pent-4-enyl)-4-methyl-benzenesulfonamide (**7e**)<sup>5</sup> was synthesized by the replacement of the alcohol on pent-4-en-1-ol by the sulfonamide via the Mitsunobu reaction as previously reported.<sup>5</sup> *N*-(2-allylbenzyl)-4-methylbenzenesulfonamide (**13**)<sup>5</sup> was obtained from the Stille coupling of *N*-(2-bromobenzyl)-4-methylbenzenesulfonamide with allyltributyltin as previously reported.<sup>5</sup>

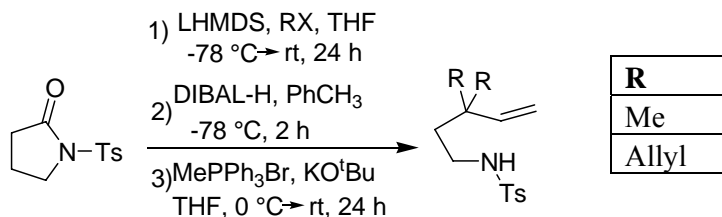

*N*-(3,3-dimethylpent-4-enyl)-4-methylbenzenesulfonamide (**9**) was synthesized according to the procedure previously reported by Haque.<sup>18,19</sup>

1,1,1,3,3,3-Hexamethyldisilazane (1.86 mL, 1.41 g, 8.80 mmol) was dissolved in dry THF (20 mL) and cooled to -78 °C under an Argon atmosphere. To this solution *n*-Butyl lithium (3.5 mL, 2.5 M solution in hexanes), was added dropwise and the solution was allowed to stir for 20 minutes. A solution of 1-tosylpyrrolidin-2-one<sup>18</sup> (1.00 g, 4.20 mmol) in dry THF (20 mL) was added dropwise and the solution was allowed to stir for an additional 20 min. Next, iodomethane (0.55 mL, 1.25 g, 8.80 mmol) was added dropwise to the reaction and the resulting mixture was then left to stir and come to rt over 24 h. The reaction was quenched with 40 mL of water and extracted with 4 x 30 mL of EtOAc. The combined organics were washed with brine (2 x 60 mL), dried over Na<sub>2</sub>SO<sub>4</sub>, filtered, and the solvent removed *in vacuo*. The resulting crude solid (0.998 g) was used without further purification.

The crude 3,3-dimethyl-1-tosylpyrrolidin-2-one (0.998 g, 3.70 mmol) was dissolved in dry toluene (37 mL) and cooled to -78 °C under an Argon atmosphere. To this mixture DIBAL-H (6.87 mL, 1.2 M solution in toluene, 8.20 mmol), was added dropwise with stirring and the reaction was allowed to continue for 2 h. The reaction was quenched with 60 mL of sat. sodium potassium tartrate (aq.) and then left to stir at rt for 24 h. The organic layer was separated and the aqueous layer was then extracted with EtOAc (3 x 30 mL). The combined organics were dried over Na<sub>2</sub>SO<sub>4</sub>, filtered, and the solvent removed *in vacuo*. The resulting crude material (1.01 g) was used without further purification.

A solution of MePPh<sub>3</sub>Br (3.30 g, 9.20 mmol) in dry THF (10 mL) was prepared and cooled to 0 °C under an Argon atmosphere. To this solution KO<sup>t</sup>Bu (1.05 g, 9.20 mmol) was added in two portions and the mixture was allowed to stir for 10 min. The crude 3,3-dimethyl-1-tosylpyrrolidin-2-ol (1.01 g, 3.70 mmol) dissolved in dry THF (20 mL), was added dropwise and the resulting mixture was then left to stir and come to rt over 24 h. The reaction was quenched with 35 mL of water and the organic layer was

separated. The aqueous layer was then extracted with EtOAc (3 x 30 mL) and the combined organics were dried over Na<sub>2</sub>SO<sub>4</sub>, filtered, and the solvent removed *in vacuo*. Flash chromatography of the resulting crude oil on SiO<sub>2</sub> (0-30% v/v EtOAc in hexanes gradient) afforded the known sulfonamide (**9**)<sup>19</sup> in 67% yield over 3 steps (unoptimized). <sup>1</sup>H NMR (400 MHz, CDCl<sub>3</sub>): δ 7.73 (d, J = 8.0 Hz, 2H), 7.31 (d, J = 8.4 Hz, 2H), 5.68 (dd, J = 10.8, 17.2 Hz, 1H), 4.93 (d, J = 11.2 Hz, 1H), 4.87 (d, J = 18.4 Hz, 1H), 4.25 (bs, 1H), 2.94-2.87 (m, 2H), 2.43 (s, 3H), 1.47 (apparent t, J = 8.0 Hz, 2H), 0.94 (s, 6H).

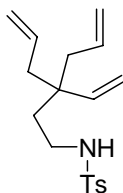

### ***N*-(3-allyl-3-vinylhex-5-enyl)-4-methylbenzenesulfonamide (**15**)**

The sulfonamide **15** was prepared the same as above except allyl bromide was used in place of methyl iodide for the alkylation. The desired sulfonamide **15** was obtained in 51% yield over 3 steps. <sup>1</sup>H NMR (500 MHz, CDCl<sub>3</sub>): δ 7.72 (d, J = 8.5 Hz, 2H), 7.31 (d, J = 8.0 Hz, 2H), 5.67-5.58 (m, 3H), 5.10-4.86 (m, 6H), 4.32 (t, J = 6.0 Hz, 1H), 2.93-2.89 (m, 2H), 2.43 (s, 3H), 2.02 (d, J = 7.5 Hz, 4H), 1.47 (dd, J = 8.0, 9.5 Hz, 2H); <sup>13</sup>C NMR (75.5 MHz, CDCl<sub>3</sub>): δ 144.3, 143.4, 136.9, 133.7, 129.7, 127.1, 117.9, 113.8, 41.3, 40.7, 38.9, 36.5, 21.5; IR (neat): 3282, 3076, 2977, 2923, 1639, 1599, 1418, 1327, 1160, 1095, 999, 915, 815 cm<sup>-1</sup>; HRMS (ESI) calcd for [M+1]<sup>+</sup> C<sub>18</sub>H<sub>26</sub>O<sub>2</sub>NS 320.1679, found 320.1680.

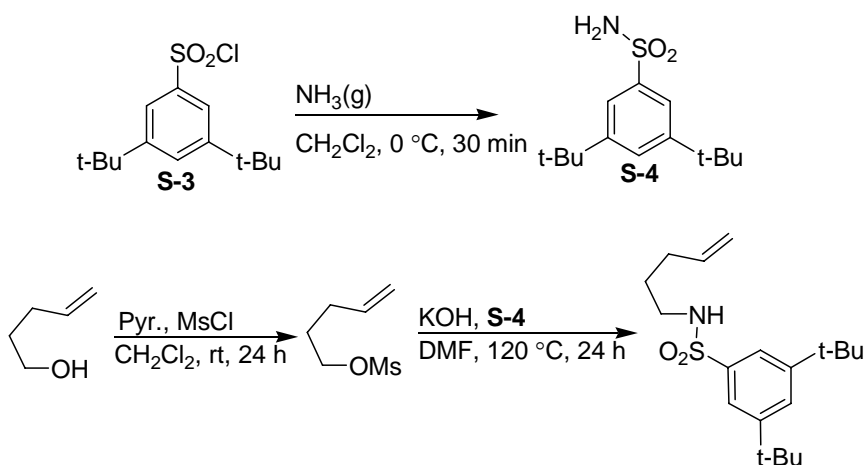

**3,5-Di-*tert*-butyl-*N*-(pent-4-enyl)benzenesulfonamide (**7f**)** was synthesized analogous to the protocol developed by Marcotullio.<sup>20</sup>

Sulfonamide **S-4** was synthesized following the analogous procedure described by Flemer.<sup>21</sup>

To an oven dried flask with a stir bar, under argon, was added 3,5-di-*tert*-butylbenzenesulfonyl chloride (**S-3**) (0.8 g, 2.76 mmol) and methylene chloride (15 mL) and the flask was placed in a 0 °C ice bath. Gaseous ammonia was introduced through a needle inlet such that it bubbled through the reaction mixture at a steady flow. With a steady flow of ammonia the reaction mixture was allowed to stir at 0 °C, under argon for 30 minutes. After the time had elapsed the reaction mixture was diluted with brine and extracted with methylene chloride (3 x 15 mL). The organic extracts were combined, dried over Na<sub>2</sub>SO<sub>4</sub>, filtered, and the solvent removed *in vacuo* providing the crude sulfonamide **S-4** ~0.8 g, which was used without further purification. mp = 145 – 146 °C; <sup>1</sup>H NMR (400 MHz, CDCl<sub>3</sub>): δ 7.77 (d, J = 1.6 Hz, 2H), 7.63 (t, J = 1.6 Hz, 1H), 4.88 (bs, 2H), 1.35 (s, 18H); <sup>13</sup>C NMR (75.5 MHz, CDCl<sub>3</sub>): δ 152.3, 141.3, 127.1, 120.5, 35.2, 31.3; IR (neat): 3342, 3260, 2960, 1599, 1551, 1475, 1336, 1311, 1248, 1169, 904, 734 cm<sup>-1</sup>; HRMS (ESI) calcd for [M+Na]<sup>+</sup> C<sub>14</sub>H<sub>23</sub>O<sub>2</sub>NSNa 292.1342 found 292.1341.

To a stirred solution of pent-4-en-1-ol (0.6 mL, 0.5 g, 5.81 mmol) and MsCl (0.54 mL, 0.799 g, 6.98 mmol) in CH<sub>2</sub>Cl<sub>2</sub> (30 mL), at 0 °C, Et<sub>3</sub>N (2.45 mL, 1.779 g, 17.57 mmol) was added dropwise. After 1 h

the reaction mixture was diluted with H<sub>2</sub>O (40 mL) and extracted with CH<sub>2</sub>Cl<sub>2</sub> (3 × 25 mL). The combined organic layers were washed with H<sub>2</sub>O (2 × 50 mL), brine (2 × 50 mL), dried over Na<sub>2</sub>SO<sub>4</sub>, filtered, and the solvent removed *in vacuo* providing the crude mesylate, 0.96 g, which was used in the next step without further purification.

Potassium carbonate (0.77 g, 5.57 mmol) was dissolved in DMF (9 mL) at 120 °C and 3,5-di-*tert*-butylbenzenesulfonamide **S-4** (0.75 g, 2.78 mmol) was added to the resulting solution. After 30 min a solution of the mesylate (0.304 g, 1.85 mmol) in DMF (1 mL) was added. After 1 h the reaction mixture was cooled, diluted with H<sub>2</sub>O (10 mL) and extracted with Et<sub>2</sub>O (4 × 5 mL). The combined organic layers were washed with H<sub>2</sub>O (3 × 5 mL), brine (3 × 5 mL), dried over MgSO<sub>4</sub>, filtered, and the solvent was removed *in vacuo*. The crude residue was further purified via flash chromatography on SiO<sub>2</sub> (0-40% Et<sub>2</sub>O in hexanes eluent) providing pure 3,5-di-*tert*-butyl-*N*-(pent-4-enyl)benzenesulfonamide (**7f**), (0.46 g, 1.36 mmol) in 70% yield over two steps as a viscous clear oil. <sup>1</sup>H NMR (400 MHz, CDCl<sub>3</sub>): δ 7.69 (d, J = 2.0 Hz, 2H), 7.62 (t, J = 2.0 Hz, 1H), 5.73-5.63 (m, 1H), 4.97-4.92 (m, 2H), 4.40 (t, J = 6.0 Hz, 1H), 2.99 (q, J = 6.8 Hz, 2H), 2.04 (qd, J = 1.2, 7.2 Hz, 2H), 1.60-1.52 (m, 2H), 1.35 (s, 18H); <sup>13</sup>C NMR (75.5 MHz, CDCl<sub>3</sub>): δ 152.1, 139.2, 137.2, 126.7, 121.1, 115.5, 42.6, 35.1, 31.2, 30.6, 28.6; IR (neat): 3279, 3020, 2964, 1600, 1439, 1328, 1311, 1248, 1163, 883, 703 cm<sup>-1</sup>; HRMS (ESI) calcd for [M+Na]<sup>+</sup> C<sub>19</sub>H<sub>31</sub>O<sub>2</sub>NSNa 360.1968, found 360.1970.

### Catalytic Methods for Aniline Substrates:

#### Representative procedure for the catalytic racemic aminohalogenation of alkenes:

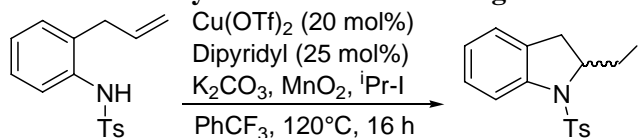

#### (±)-2-(Iodomethyl)-1-tosylindoline (**4a**)

Copper (II) triflate (13.0 mg, 0.036 mmol) was added to an oven dried pressure tube (10 mL) equipped with a stir bar, in a glovebox. Upon removal from the glove box the pressure tube was flushed with argon any time it was opened. To the tube, dipyridyl (7.10 mg, 0.045 mmol) was added and the mixture was dissolved in PhCF<sub>3</sub> (1.80 mL), the tube was then sealed and heated to 60 °C for 2 h in an oil bath with stirring. Upon cooling to rt, the following reagents were then added sequentially: sulfonamide (**1a**) (51.2 mg, 0.178 mmol), MnO<sub>2</sub> (46.9 mg, 0.539 mmol), K<sub>2</sub>CO<sub>3</sub> (24.9 mg, 0.180 mmol), <sup>i</sup>Pr-I (0.108 mL, 183.6 mg, 1.08 mmol) and ~36 mg of flame activated 4Å molecular sieves. The tube was then flushed with argon, sealed, and sonicated to ensure that all reagents were in solution. The mixture was stirred at 120 °C (oil bath) for 16 h. The room temperature reaction mixture was then filtered through a pad of Celite with EtOAc. The filtrate was collected and the solvent removed *in vacuo* to yield the crude product as a solid. Flash chromatography of the resulting crude material on SiO<sub>2</sub> (0-20% v/v EtOAc in hexanes gradient) afforded **4a** in good yield. Further purification using HPLC 10% EtOAc in hexanes, isocratic, was used prior to chiral HPLC analysis.

#### Representative procedure for the catalytic enantioselective aminohalogenation of aniline derived alkenes:

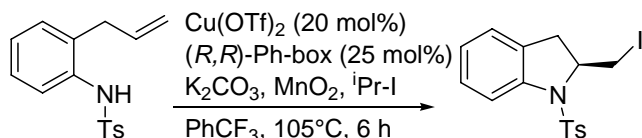

#### (*S*)-2-(Iodomethyl)-1-tosylindoline (**4a**)

Copper (II) triflate (12.5 mg, 0.035 mmol) was added to an oven dried pressure tube (10 mL) equipped with a stir bar, in a glovebox. Upon removal from the glove box the pressure tube was flushed with argon any time it was opened. To the tube, (*R,R*)-Ph-box (**2**) (14.5 mg, 0.045 mmol) in PhCF<sub>3</sub> (0.54 mL, 0.08 M) was added and the mixture was dissolved in additional PhCF<sub>3</sub> (1.21 mL). The tube was sealed and the mixture was stirred at 60 °C (oil bath) for 2 h. Upon cooling to rt, the following reagents were added

sequentially: N-(2-allylphenyl)-4-methyl-benzenesulfonamide<sup>5</sup> (**1a**) (50.7 mg, 0.176 mmol), MnO<sub>2</sub> (47.7 mg, 0.549 mmol), K<sub>2</sub>CO<sub>3</sub> (24.5 mg, 0.177 mmol), <sup>1</sup>Pr-I (0.104 mL, 177.5 mg, 1.04 mmol) and ~36 mg of flame activated 4Å molecular sieves. The tube was then flushed with argon, sealed, and the mixture was sonicated to ensure that all reagents were in solution. The reaction mixture was then stirred at 105 °C (oil bath) for 6 h. Upon cooling to rt, the mixture was filtered through a pad of Celite with EtOAc. The filtrate was collected and the solvent was removed *in vacuo* to yield the crude product as a solid. Flash chromatography of the resulting crude material on SiO<sub>2</sub> (0-20% v/v EtOAc in hexanes gradient) afforded indoline **4a** (62.7 mg, 0.152 mmol) as opaque crystals in 86% yield. Further purification by HPLC 10% EtOAc in hexanes, isocratic, was used prior to chiral HPLC analysis. mp = 123-125 °C; [ $\alpha$ ]<sub>D</sub><sup>24</sup> = 49.2 ° (c = 0.5, CHCl<sub>3</sub>), ee = 89%, determined by HPLC analysis [Regis (*S,S*) Whelk-O 1, 2% IPA/hexane, 1 mL/min,  $\lambda$  = 254 nm, t(major) = 14.92 min, t(minor) = 18.83 min]; <sup>1</sup>H NMR (400 MHz, CDCl<sub>3</sub>):  $\delta$  7.65 (d, J = 8.0 Hz, 1H), 7.56 (d, J = 8.4 Hz, 2H), 7.25-7.18 (m, 3H), 7.06-7.03 (m, 2H), 4.37-4.35 (m, 1H), 3.67 (dd, J = 3.6, 9.6 Hz, 1H), 3.27 (apparent t, J = 10.0 Hz, 1H), 2.95-2.84 (m, 2H), 2.36 (s, 3H); <sup>13</sup>C NMR (75.5 MHz, CDCl<sub>3</sub>):  $\delta$  144.2, 141.2, 134.5, 130.4, 129.7, 128.0, 127.0, 125.2, 124.9, 116.8, 62.5, 34.8, 21.5, 11.4; IR (neat): 3032, 2916, 1597, 1479, 1355, 1167, 1013, 961, 757, 666 cm<sup>-1</sup>; HRMS (EI) calcd for [M]<sup>+</sup> C<sub>16</sub>H<sub>16</sub>O<sub>2</sub>NIS 412.9941, found 412.9939.

### Assignment of Absolute Stereochemistry of Indoline Products:

The crystal structure of indoline **4a** (CCDC 858586) showing the *S* stereochemistry was obtained by William W. Brennessel at the University of Rochester. The absolute configuration of all other indoline products was assigned by analogy to this structure.

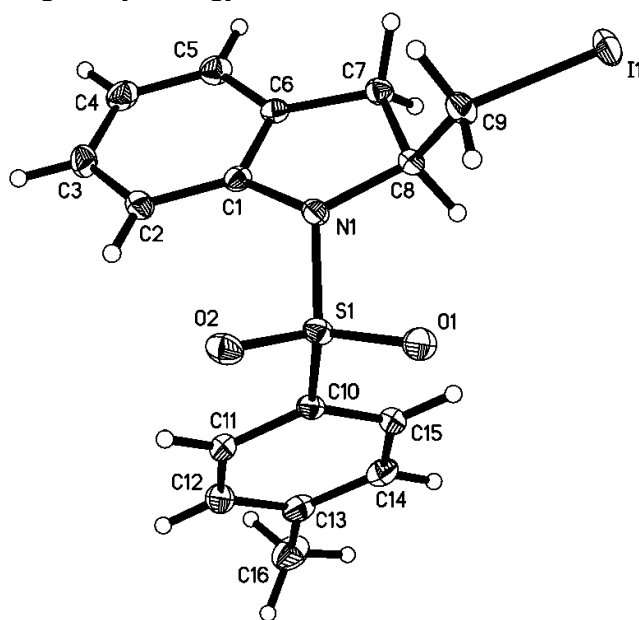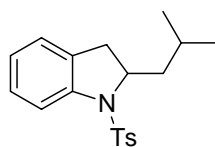

### 2-Isobutyl-1-tosylindoline (**6**)

In a duplicate run, Indoline **6** (4.2 mg, 0.013 mmol) was obtained as a clear oil in 7% yield, as a minor product, from the corresponding sulfonamide **1a**<sup>5</sup> (51.9 mg, 0.181 mmol): <sup>1</sup>H NMR (400 MHz, CDCl<sub>3</sub>):  $\delta$  7.66 (d, J = 8.0 Hz, 1H), 7.49 (d, J = 8.4 Hz, 2H), 7.23-7.19 (m, 2H), 7.14 (d, J = 8.4 Hz, 2H), 7.02 (d, J = 5.2 Hz, 1H), 4.30-4.25 (m, 1H), 2.67 (dd, J = 9.6, 16.4 Hz, 1H), 2.40 (dd, J = 1.6, 15.6 Hz, 1H), 2.35 (s, 3H), 1.89-1.83 (m, 1H), 1.76-1.69 (m, 1H), 1.39-1.32 (m, 1H), 0.98 (dd, J = 6.4, 20.8 Hz, 6H); <sup>13</sup>C NMR

(75.5 MHz, CDCl<sub>3</sub>):  $\delta$  143.6, 141.3, 135.4, 132.9, 129.4, 127.6, 127.0, 125.1, 124.9, 118.5, 61.2, 45.7, 34.5, 24.4, 22.8, 22.4, 21.5; IR (neat): 3031, 2955, 1677, 1592, 1479, 1456, 1353, 1167, 1091, 758 cm<sup>-1</sup>; HRMS (ESI) calcd for [M+Na]<sup>+</sup> C<sub>19</sub>H<sub>23</sub>O<sub>2</sub>NSNa 352.1342, found 352.1343.

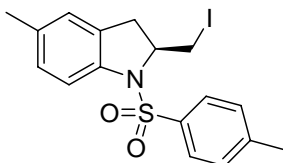

**(S)-2-(Iodomethyl)-5-methyl-1-tosylindoline (4b)**

Indoline **4b** (62.9 mg, 0.147 mmol) was obtained as a white solid in an 85% yield from the corresponding sulfonamide<sup>6</sup> **1b** (52.2 mg, 0.173 mmol): mp = 74-75°C;  $[\alpha]_D^{24} = 65.8^\circ$  (c = 0.5, CHCl<sub>3</sub>), ee = 90%, determined by HPLC analysis [Regis (*S,S*) Whelk-O 1, 2% IPA/hexane, 1 mL/min,  $\lambda = 254$  nm, t(major) = 12.96 min, t(minor) = 16.02 min]; <sup>1</sup>H NMR (400 MHz, CDCl<sub>3</sub>):  $\delta$  7.53 (m, 3H), 7.18 (d, J = 8.0 Hz, 2H), 7.02 (d, J = 8.0 Hz, 1H), 6.86 (s, 1H), 4.34-4.31 (m, 1H), 3.65 (dd, J = 4.0, 10.0 Hz, 1H), 3.25 (apparent t, J = 10.0 Hz, 1H), 2.90-2.78 (m, 2H), 2.36 (s, 3H), 2.28 (s, 3H); <sup>13</sup>C NMR (75.5 MHz, CDCl<sub>3</sub>):  $\delta$  144.1, 138.8, 134.7, 134.5, 130.5, 129.7, 128.6, 127.1, 125.8, 116.7, 62.7, 34.7, 21.5, 21.0, 11.4; IR (neat): 3029, 2919, 1597, 1486, 1354, 1166, 1090, 1024, 963, 814, 754, 666, 608 cm<sup>-1</sup>; HRMS (ESI) calcd for [M+1]<sup>+</sup> C<sub>17</sub>H<sub>19</sub>O<sub>2</sub>NIS 428.0176, found 428.0189.

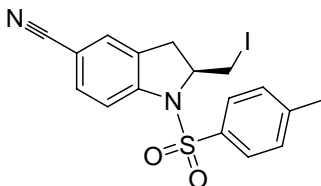

**(S)-2-(Iodomethyl)-1-tosylindoline-5-carbonitrile (4c)**

Indoline **4c** (63.7 mg, 0.145 mmol) was obtained as white crystals in 85% yield from *N*-(2-Allyl-4-cyano-phenyl)-4-methyl-benzenesulfonamide (**1c**)<sup>4</sup> (53.4 mg, 0.171 mmol). mp = 151-153°C;  $[\alpha]_D^{24} = 107.1^\circ$  (c = 0.5, CHCl<sub>3</sub>), ee = 84%, determined by HPLC analysis [Chiralpak AD-RH, 4% IPA/hexane, 1 mL/min,  $\lambda = 254$  nm, t(minor) = 26.83 min, t(major) = 35.90 min]; <sup>1</sup>H NMR (400 MHz, CDCl<sub>3</sub>):  $\delta$  7.71 (d, J = 8.0 Hz, 1H), 7.61 (d, J = 8.8 Hz, 2H), 7.52 (d, J = 8.0 Hz, 1H), 7.34 (s, 1H), 7.25 (d, J = 8.0 Hz, 2H), 4.41-4.37 (m, 1H), 3.67 (dd, J = 3.2, 10.0 Hz, 1H), 3.34 (apparent t, J = 10.0 Hz, 1H), 3.06 (dd, J = 9.6, 12.8 Hz, 1H), 2.91 (dd, J = 3.2 Hz, 12.0 Hz, 1H), 2.39 (s, 3H); <sup>13</sup>C NMR (75.5 MHz, CDCl<sub>3</sub>):  $\delta$  145.3, 145.1, 134.3, 132.9, 131.2, 130.1, 128.9, 126.9, 118.7, 116.2, 107.8, 62.5, 34.7, 21.6, 11.0; IR (neat): 3022, 2923, 2226, 1607, 1482, 1359, 1167, 1090, 963, 814, 752, 666 cm<sup>-1</sup>; HRMS (EI) calcd for [M]<sup>+</sup> C<sub>17</sub>H<sub>15</sub>O<sub>2</sub>NIS 437.9893, found 437.9887.

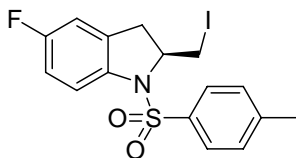

**(S)-5-Fluoro-2-(iodomethyl)-1-tosylindoline (4d)**

Indoline **4d** (64.3 mg, 0.149 mmol) was obtained as a white solid in an 80% yield from the corresponding sulfonamide<sup>6</sup> **1d** (57.6 mg, 0.189 mmol). mp = 118-120°C;  $[\alpha]_D^{24} = 43.9^\circ$  (c = 0.5, CHCl<sub>3</sub>), ee = 89%, determined by HPLC analysis [Regis (*S,S*) Whelk-O 1, 2% IPA/hexane, 1 mL/min,  $\lambda = 254$  nm, t(major) = 14.21 min, t(minor) = 16.80 min]; <sup>1</sup>H NMR (400 MHz, CDCl<sub>3</sub>):  $\delta$  7.61-7.58 (m, 1H), 7.53 (d, J = 8.4 Hz, 2H), 7.20 (d, J = 8.0 Hz, 2H), 6.92 (t, J = 8.8 Hz, 1H), 6.77 (d, J = 8.0 Hz, 1H), 4.38-4.32 (m, 1H), 3.63 (dd, J = 3.2, 10.0 Hz, 1H), 3.26 (t, J = 10.0 Hz, 1H), 2.86-2.80 (m, 2H), 2.37 (s, 3H); <sup>13</sup>C NMR (75.5 MHz, CDCl<sub>3</sub>):  $\delta$  160.4 (d, J = 243.1 Hz), 144.4, 137.2, 134.1, 132.7 (d, J = 9.2 Hz), 129.8, 127.1, 118.1 (d,



$J = 8.1$  Hz), 114.7 (d,  $J = 23$  Hz), 112.3 (d,  $J = 24$  Hz), 62.9, 34.8, 21.5, 10.9; IR (neat): 3031, 2921, 1598, 1481, 1356, 1166, 1090, 934, 814, 755, 667  $\text{cm}^{-1}$ ; HRMS (EI) calcd for  $[\text{M}]^+$   $\text{C}_{16}\text{H}_{15}\text{O}_2\text{NISF}$  430.9847, found 430.9837.

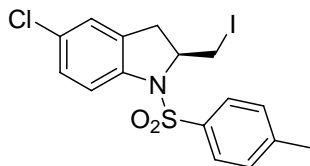

#### (S)-5-Chloro-2-(iodomethyl)-1-tosylindoline (4e)

Indoline **4e** (59.9 mg, 0.134 mmol) was obtained as a white solid in 83% yield from *N*-(2-Allyl-4-chlorophenyl)-4-methyl-benzenesulfonamide (**1e**)<sup>6</sup> (57.4 mg, 0.178 mmol). mp = 108-110°C;  $[\alpha]_{\text{D}}^{24} = 52.9^\circ$  ( $c = 0.5$ ,  $\text{CHCl}_3$ ), ee = 87%, determined by HPLC analysis [Regis (*S,S*) Whelk-O 1, 2% IPA/hexane, 1 mL/min,  $\lambda = 254$  nm,  $t(\text{major}) = 12.63$  min,  $t(\text{minor}) = 14.73$  min];  $^1\text{H}$  NMR (400 MHz,  $\text{CDCl}_3$ ):  $\delta$  7.58-7.55 (m, 3H), 7.23-7.18 (m, 3H), 7.04 (s, 1H), 4.37-4.31 (m, 1H), 3.64 (dd,  $J = 3.6, 10.0$  Hz, 1H), 3.28 (apparent t,  $J = 9.6$  Hz, 1H), 2.95-2.80 (m, 2H), 2.38 (s, 3H);  $^{13}\text{C}$  NMR (75.5 MHz,  $\text{CDCl}_3$ ):  $\delta$  144.5, 139.9, 134.1, 132.3, 130.1, 129.9, 128.1, 127.0, 125.4, 117.7, 62.7, 34.7, 21.5, 11.0; IR (neat): 3029, 2924, 1598, 1473, 1357, 1167, 1023, 814, 666  $\text{cm}^{-1}$ ; HRMS (ESI) calcd for  $[\text{M}+\text{Na}]^+$   $\text{C}_{16}\text{H}_{15}\text{O}_2\text{NClI}$ NaS 469.9449, found 469.9429.

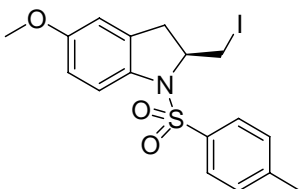

#### (S)-2-(Iodomethyl)-5-methoxy-1-tosylindoline (4f)

Indoline **4f** (55.9 mg, 0.126 mmol) was obtained as a white solid in a 72% yield from the corresponding sulfonamide<sup>6</sup> **1f** (55.7 mg, 0.175 mmol). mp = 137-139°C;  $[\alpha]_{\text{D}}^{24} = 91.6^\circ$  ( $c = 0.5$ ,  $\text{CHCl}_3$ ), ee = 87%, determined by HPLC analysis [Regis (*S,S*) Whelk-O 1, 2% IPA/hexane, 1 mL/min,  $\lambda = 254$  nm,  $t(\text{major}) = 22.87$  min,  $t(\text{minor}) = 28.69$  min];  $^1\text{H}$  NMR (400 MHz,  $\text{CDCl}_3$ ):  $\delta$  7.55 (d,  $J = 8.8$  Hz, 1H), 7.51 (d,  $J = 8.4$  Hz, 2H), 7.18 (d,  $J = 8.0$  Hz, 2H), 6.76 (dd,  $J = 2.4, 8.8$  Hz, 1H), 6.60 (d,  $J = 2.0$  Hz, 1H), 4.33-4.31 (m, 1H), 3.76 (s, 3H), 3.62 (dd,  $J = 4.0, 10.0$  Hz, 1H), 3.23 (apparent t,  $J = 9.6$  Hz, 1H), 2.81-2.77 (m, 2H), 2.37 (s, 3H);  $^{13}\text{C}$  NMR (75.5 MHz,  $\text{CDCl}_3$ ):  $\delta$  157.6, 144.1, 134.5, 134.2, 132.4, 129.7, 127.1, 118.2, 113.2, 110.9, 62.9, 55.6, 34.9, 21.5, 11.1; IR (neat): 3027, 2955, 1598, 1487, 1353, 1263, 1165, 1090, 1032, 813, 751, 667  $\text{cm}^{-1}$ ; HRMS (ESI) calcd for  $[\text{M}+1]^+$   $\text{C}_{17}\text{H}_{19}\text{O}_3\text{NIS}$  444.0125, found 444.0124.

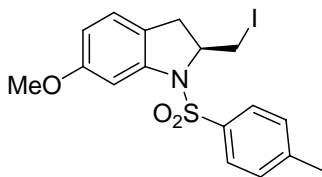

#### (S)-2-(Iodomethyl)-6-methoxy-1-tosylindoline (4g)

Indoline **4g** (47.9 mg, 0.108 mmol) was obtained as a clear oil in a 71% yield from the corresponding sulfonamide<sup>4</sup> **1g** (48.5 mg, 0.153 mmol).  $[\alpha]_{\text{D}}^{24} = 80.3^\circ$  ( $c = 0.64$ ,  $\text{CHCl}_3$ ), ee = 88%, determined by HPLC analysis [Regis (*S,S*) Whelk-O 1, 2% IPA/hexane, 1 mL/min,  $\lambda = 254$  nm,  $t(\text{major}) = 14.01$  min,  $t(\text{minor}) = 18.02$  min];  $^1\text{H}$  NMR (400 MHz,  $\text{CDCl}_3$ ):  $\delta$  7.57 (d,  $J = 8.0$  Hz, 2H), 7.23 (s, 1H), 7.19 (d,  $J = 8.4$  Hz, 2H), 6.92 (d,  $J = 8.0$  Hz, 1H), 6.58 (dd,  $J = 2.4, 8.4$  Hz, 1H), 4.38-4.30 (m, 1H), 3.82 (s, 3H), 3.64 (dd,  $J = 3.2, 10.0$  Hz, 1H), 3.26 (apparent t,  $J = 10.0$  Hz, 1H), 2.90-2.73 (m, 2H), 2.36 (s, 3H);  $^{13}\text{C}$  NMR (75.5 MHz,  $\text{CDCl}_3$ ):  $\delta$  159.9, 144.3, 142.4, 134.6, 129.8, 127.1, 125.5, 122.1, 111.1, 102.7, 63.4, 55.7, 34.1, 21.6, 11.4; IR (neat): 3050, 2922, 1615, 1497, 1354, 1285, 1165, 1111, 1032, 812  $\text{cm}^{-1}$ ; HRMS (ESI) calcd for  $[\text{M}+\text{Na}]^+$   $\text{C}_{17}\text{H}_{18}\text{O}_3\text{NISNa}$  465.9944, found 465.9955.

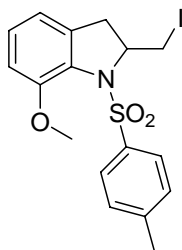

#### 2-(Iodomethyl)-7-methoxy-1-tosylindoline (4h)

Indoline **4h** (55.8 mg, 0.126 mmol) was obtained as opaque crystals in 80% yield from the corresponding sulfonamide **1h** (49.9 mg, 0.157 mmol). mp = 123-124°C;  $[\alpha]_D^{24} = -4.7^\circ$  (c = 0.67, CHCl<sub>3</sub>), ee = 15%, determined by HPLC analysis [Regis (*S,S*) Whelk-O 1, 2% IPA/hexane, 1 mL/min,  $\lambda = 254$  nm, t(major) = 30.64 min, t(minor) = 36.97 min]; <sup>1</sup>H NMR (400 MHz, CDCl<sub>3</sub>):  $\delta$  7.59 (d, J = 6.4 Hz, 2H), 7.22 (d, J = 6.0 Hz, 2H), 7.08 (t, J = 6.4 Hz, 1H), 6.81 (d, J = 6.4 Hz, 1H), 6.72 (d, J = 6.0 Hz, 1H), 4.80-4.76 (m, 1H), 3.78 (s, 3H), 3.45 (dd, J = 3.6, 8.0 Hz, 1H), 3.11 (apparent t, J = 8.0 Hz, 1H), 2.73-2.71 (m, 2H), 2.40 (s, 3H); <sup>13</sup>C NMR (75.5 MHz, CDCl<sub>3</sub>):  $\delta$  151.9, 143.7, 136.2, 135.8, 129.9, 129.3, 127.44, 127.42, 117.6, 112.3, 64.3, 56.0, 34.6, 21.6, 9.6; IR (neat): 3027, 2925, 1595, 1488, 1333, 1277, 1158, 1088, 935, 813, 762, 675 cm<sup>-1</sup>; HRMS (ESI) calcd for [M+1]<sup>+</sup> C<sub>17</sub>H<sub>19</sub>O<sub>3</sub>NIS 444.0125, found 444.0122.

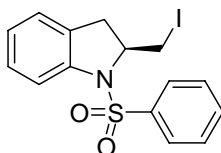

#### (*S*)-2-(Iodomethyl)-1-(phenylsulfonyl)indoline (4i)

Indoline **4i** (53.2 mg, 0.133 mmol) was obtained as a white solid in a 77% yield from N-(2-allylphenyl)benzene sulfonamide (**1i**) (47.2 mg, 0.173 mmol). mp = 82-84°C;  $[\alpha]_D^{24} = 37.5^\circ$  (c = 0.5, CHCl<sub>3</sub>), ee = 88%, determined by HPLC analysis [Regis (*S,S*) Whelk-O 1, 2% IPA/hexane, 1 mL/min,  $\lambda = 254$  nm, t(major) = 12.61 min, t(minor) = 14.74 min]; mp = 82-84°C; <sup>1</sup>H NMR (400 MHz, CDCl<sub>3</sub>):  $\delta$  7.70-7.65 (m, 3H), 7.56-7.52 (m, 1H), 7.42-7.39 (m, 2H), 7.26-7.21 (m, 1H), 7.10-7.05 (m, 2H), 4.40-4.34 (m, 1H), 3.66 (dd, J = 3.2, 10.0 Hz, 1H), 3.26 (apparent t, J = 10.0 Hz, 1H), 2.92-2.82 (m, 2H); <sup>13</sup>C NMR (75.5 MHz, CDCl<sub>3</sub>):  $\delta$  141.0, 137.4, 133.3, 130.4, 129.1, 128.1, 127.0, 125.3, 125.0, 116.8, 62.6, 34.8, 11.2; IR (neat): 3067, 2921, 1596, 1479, 1357, 1169, 1091, 1016, 962, 756, 718, 688 cm<sup>-1</sup>; HRMS (EI) calcd for [M]<sup>+</sup> C<sub>15</sub>H<sub>14</sub>O<sub>2</sub>NIS 398.9784, found 398.9781.

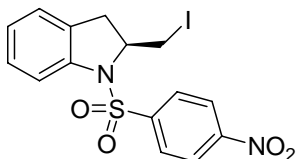

#### (*S*)-2-(Iodomethyl)-1-((4-nitrophenyl)sulfonyl)indoline (4j)

Indoline **4j** (57.2 mg, 0.129 mmol) was obtained as pale yellow crystals in 72% yield from the corresponding sulfonamide<sup>10</sup> **1j** (57.0 mg, 0.179 mmol). For this reaction the (*4R,5S*)-di-Ph-box ligand was used and the catalyst/ligand loadings were doubled to 40 and 50 mol%, respectively. mp = 135-136°C;  $[\alpha]_D^{24} = 87.8^\circ$  (c = 0.5, CHCl<sub>3</sub>), ee = 80%, determined by HPLC analysis [Regis (*S,S*) Whelk-O 1, 2% IPA/hexane, 1 mL/min,  $\lambda = 254$  nm, t(major) = 22.24 min, t(minor) = 25.38 min]; <sup>1</sup>H NMR (400 MHz, CDCl<sub>3</sub>):  $\delta$  8.25 (d, J = 8.4 Hz, 2H), 7.88 (d, J = 9.6 Hz, 2H), 7.66 (d, J = 8.0 Hz, 1H), 7.27 (m, 1H), 7.10 (m, 2H), 4.41-4.35 (m, 1H), 3.65 (dd, J = 3.6, 10.0 Hz, 1H), 3.29 (apparent t, J = 10.0 Hz, 1H), 3.00-2.85 (m, 2H); <sup>13</sup>C NMR (75.5 MHz, CDCl<sub>3</sub>):  $\delta$  150.5, 143.0, 140.1, 130.3, 128.4, 128.2, 125.7, 124.4, 116.6, 62.9, 34.8, 10.5; IR (neat): 3104, 2921, 1605, 1530, 1479, 1349, 1171, 1010, 855, 757, 620 cm<sup>-1</sup>; HRMS (EI) calcd for [M]<sup>+</sup> C<sub>15</sub>H<sub>13</sub>O<sub>4</sub>N<sub>2</sub>IS 443.9635, found 443.9641.

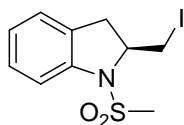

**(S)-2-(Iodomethyl)-1-(methylsulfonyl)indoline (4k)**

Indoline **4k** (54.6 mg, 0.162 mmol) was obtained as white crystals in 85% yield from *N*-(2-Allyl-phenyl)-methyl-sulfonamide (**1k**)<sup>5</sup> (38.0 mg, 0.180 mmol). For this reaction the (4*R*,5*S*)-di-Ph-box ligand (**3**) was used. mp = 163-165°C;  $[\alpha]_D^{24} = -44.1^\circ$  (c = 0.5, CHCl<sub>3</sub>), ee = 81%, determined by HPLC analysis [Chiralpak AD-RH, 2% water/MeOH, 1 mL/min,  $\lambda = 254$  nm, t(major) = 3.56 min, t(minor) = 5.12 min]; <sup>1</sup>H NMR (400 MHz, CDCl<sub>3</sub>):  $\delta$  7.42 (d, J = 8.0 Hz, 1H), 7.25-7.21 (m, 2H), 7.09 (t, J = 7.2 Hz, 2H), 4.43-4.46 (m, 1H), 3.63 (dd, J = 3.2, 9.6 Hz, 1H), 3.48 (dd, J = 10.0, 12.0 Hz, 1H), 3.31 (apparent t, J = 9.6 Hz, 1H), 3.05 (dd, J = 4.0, 16.8 Hz, 1H), 2.86 (s, 3H); <sup>13</sup>C NMR (75.5 MHz, CDCl<sub>3</sub>):  $\delta$  141.1, 129.5, 128.3, 125.5, 124.7, 115.1, 62.6, 36.3, 35.5, 11.6; IR (neat): 3009, 2924, 1479, 1344, 1157, 1018, 972, 770, 752 cm<sup>-1</sup>; HRMS (EI) calcd for [M]<sup>+</sup> C<sub>10</sub>H<sub>12</sub>O<sub>2</sub>NIS 336.9628, found 336.9628.

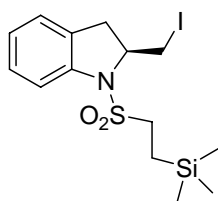

**(S)-2-(Iodomethyl)-1-((2-(trimethylsilyl)ethyl)sulfonyl)indoline (4l)**

Indoline **4l** (62.3 mg, 0.147 mmol) was obtained as a white solid in an 85% yield from *N*-(2-allylphenyl)-2-(trimethylsilyl)ethane sulfonamide (**1l**) (51.5 mg, 0.173 mmol). For this reaction the (4*R*,5*S*)-di-Ph-box ligand (**3**) was used. mp = 94-95°C;  $[\alpha]_D^{24} = -32.2^\circ$  (c = 0.5, CHCl<sub>3</sub>), ee = 82%, determined by HPLC analysis [Chiralpak AD-RH, 4% water/MeOH, 0.5 mL/min,  $\lambda = 254$  nm, t(major) = 5.97 min, t(minor) = 7.07 min]; <sup>1</sup>H NMR (400 MHz, CDCl<sub>3</sub>):  $\delta$  7.35 (d, J = 7.6 Hz, 1H), 7.22-7.18 (m, 2H), 7.06 (t, J = 7.6 Hz, 1H), 4.56-4.52 (m, 1H), 3.61 (dd, J = 3.2, 10 Hz, 1H), 3.46 (dd, J = 9.6, 16.8 Hz, 1H), 3.28 (apparent t, J = 9.6 Hz, 1H), 3.07 (dd, J = 3.2, 16.4 Hz, 1H), 3.00-2.94 (m, 2H), 1.09-1.02 (m, 2H), -0.03 (s, 9H); <sup>13</sup>C NMR (75.5 MHz, CDCl<sub>3</sub>):  $\delta$  141.3, 129.1, 128.2, 125.5, 124.1, 114.4, 62.9, 46.8, 35.2, 11.8, 9.9, -2.1; IR (neat): 3010, 2950, 1603, 1479, 1348, 1252, 1149, 1105, 1023, 966, 841, 754 cm<sup>-1</sup>; HRMS (ESI) calcd for [M+Na]<sup>+</sup> C<sub>14</sub>H<sub>22</sub>O<sub>2</sub>NINaSSi 446.0077, found 446.0078.

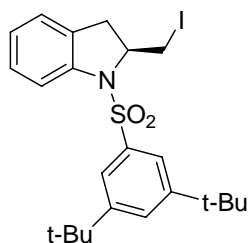

**(S)-2-(Iodomethyl)-1-(3,5-ditertbutylbenzene sulfonyl)indoline (4m)**

Indoline **4m** (64.2 mg, 0.126 mmol) was obtained as an orange solid in 90% yield from *N*-(2-allylphenyl)-3,5-di-*tert*-butylbenzenesulfonamide (**1m**) (53.8 mg, 0.140 mmol). mp = 126-127°C;  $[\alpha]_D^{24} = 17.3^\circ$  (c = 0.83, CHCl<sub>3</sub>); <sup>1</sup>H NMR (400 MHz, CDCl<sub>3</sub>):  $\delta$  7.71 (d, J = 8.0 Hz, 1H), 7.54 (s, 1H), 7.42 (s, 2H), 7.26-7.22 (m, 1H), 7.07-7.03 (m, 2H), 4.32-4.25 (m, 1H), 3.62 (dd, J = 3.2, 9.6 Hz, 1H), 3.25 (t, J = 9.6 Hz, 1H), 2.81-2.67 (m, 2H), 1.20 (s, 18H); <sup>13</sup>C NMR (75.5 MHz, CDCl<sub>3</sub>):  $\delta$  152.1, 141.6, 136.4, 130.9, 127.9, 127.1, 125.1, 125.0, 121.1, 117.6, 62.7, 35.1, 34.7, 31.1, 11.1; IR (neat): 3031, 2961, 1598, 1478, 1360, 1248, 1170, 1012, 757 cm<sup>-1</sup>; HRMS (ESI) calcd for [M+1]<sup>+</sup> C<sub>23</sub>H<sub>31</sub>O<sub>2</sub>NIS 512.1115, found 512.1112.

**Procedure for the catalytic enantioselective aminochlorination of N-(2-allylphenyl)-4-methylbenzenesulfonamide:**

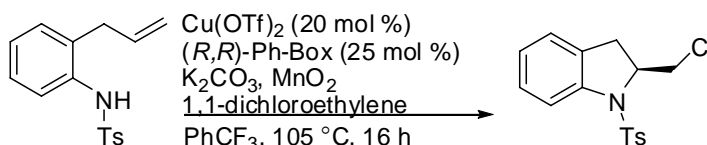

**(*S*)-2-(chloromethyl)-1-tosylindoline (4n)**

Copper (II) triflate (12.6 mg, 0.035 mmol) was added to an oven-dried pressure tube (10 mL) equipped with a stir bar, in a glovebox. Upon removal from the glovebox the pressure tube was flushed with argon any time it was opened. To the tube, (*R,R*)-Ph-box (**2**) (14.5 mg, 0.043 mmol) in PhCF<sub>3</sub> (0.54 mL, 0.08 M) was added and the mixture was dissolved in additional PhCF<sub>3</sub> (1.20 mL), the tube was then sealed and heated to 60 °C for 2 h in an oil bath with stirring. The following reagents were then added sequentially: N-(2-allylphenyl)-4-methyl-benzenesulfonamide<sup>5</sup> (51.8 mg, 0.180 mmol), MnO<sub>2</sub> (45.5 mg, 0.523 mmol), K<sub>2</sub>CO<sub>3</sub> (24.8 mg, 0.179 mmol), 1,1-dichloroethylene (0.125 mL, 152.3 mg, 1.57 mmol) and ~35 mg of flame activated 4Å molecular sieves. The tube was then flushed with argon, sealed, and sonicated to ensure that all reagents were in solution. The mixture was stirred at 105 °C (oil bath) for 16 h. Upon cooling to rt and the mixture was filtered through a pad of Celite with EtOAc. The filtrate was collected and the solvent was removed *in vacuo* to yield the crude product as a solid. Flash chromatography of the resulting crude material on SiO<sub>2</sub> (0-20% v/v EtOAc in hexanes gradient) afforded indoline **4n** (37.7 mg, 0.117 mmol) as a white solid in 65% yield. Further purification by HPLC 10% EtOAc in hexanes, isocratic, was used prior to chiral HPLC analysis. mp = 140-141°C; [α]<sub>D</sub><sup>24</sup> = 93.7° (c = 0.63, CHCl<sub>3</sub>), ee = 93%, determined by HPLC analysis [Regis (*S,S*) Whelk-O 1, 2% IPA/hexane, 1 mL/min, λ = 254 nm, t(major) = 12.35 min, t(minor) = 15.58 min]; <sup>1</sup>H NMR (400 MHz, CDCl<sub>3</sub>): δ 7.65 (d, J = 8.4 Hz, 1H), 7.56 (d, J = 8.4 Hz, 2H), 7.25-7.17 (m, 3H), 7.08-7.02 (m, 2H), 4.44-4.37 (m, 1H), 3.93 (dd, J = 3.6, 10.8 Hz, 1H), 3.55 (dd, J = 9.6, 10.4 Hz, 1H), 2.96-2.85 (m, 2H), 2.36 (s, 3H); <sup>13</sup>C NMR (75.5 MHz, CDCl<sub>3</sub>): δ 144.3, 141.1, 134.5, 130.7, 129.7, 127.9, 127.1, 125.3, 124.9, 116.9, 62.3, 46.9, 32.2, 21.6; IR (neat): 3031, 2923, 1598, 1480, 1355, 1168, 1092, 1035, 755 cm<sup>-1</sup>; HRMS (ESI) calcd for [M+Na]<sup>+</sup> C<sub>16</sub>H<sub>16</sub>O<sub>2</sub>NCISNa 344.0482, found 344.0485.

**Procedure for the catalytic enantioselective aminobromination of N-(2-allylphenyl)-4-methylbenzenesulfonamide:**

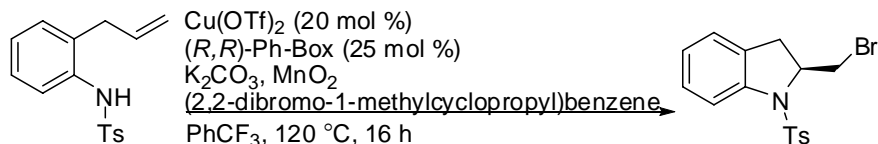

**(*S*)-2-(bromomethyl)-1-tosylindoline (4o)**

Copper (II) triflate (13.7 mg, 0.038 mmol) was added to an oven dried pressure tube (10 mL) equipped with a stir bar, in a glovebox. Upon removal from the glovebox the pressure tube was flushed with argon any time it was opened. To the tube, (*R,R*)-Ph-box (**2**) (15.8 mg, 0.047 mmol) in PhCF<sub>3</sub> (0.59 mL, 0.08 M) was added and the mixture was dissolved in additional PhCF<sub>3</sub> (1.30 mL), the tube was then sealed and heated to 60 °C for 2 h in an oil bath with stirring. The following reagents were then added sequentially: N-(2-allylphenyl)-4-methyl-benzenesulfonamide<sup>5</sup> (55.3 mg, 0.192 mmol), MnO<sub>2</sub> (49.7 mg, 0.572 mmol), K<sub>2</sub>CO<sub>3</sub> (26.1 mg, 0.189 mmol), (2,2-dibromo-1-methylcyclopropyl)benzene (0.185 mL, 329.5 mg, 1.14 mmol) and ~38 mg of flame activated 4Å molecular sieves. Once all reagents were added the tube was flushed with argon, sealed, and sonicated to ensure that all reagents were in solution, and placed in a 120 °C oil bath for 16 h. The tube was then allowed to come to rt and the mixture was filtered through a pad of Celite with EtOAc. The filtrate was collected and the solvent was removed *in vacuo* to yield the crude product as a solid. Flash chromatography of the resulting crude material on SiO<sub>2</sub> (0-20% v/v EtOAc in hexanes gradient) afforded indoline **4o** (40.2 mg, 0.110 mmol) as a white solid in 57% yield. Further purification by HPLC 10% EtOAc in hexanes, isocratic, was used prior to chiral HPLC analysis:

mp = 98-99°C;  $[\alpha]_D^{24} = 27.9^\circ$  ( $c = 0.79$ ,  $\text{CHCl}_3$ ), ee = 87%, determined by HPLC analysis [Regis (*S,S*) Whelk-O 1, 2% IPA/hexane, 1 mL/min,  $\lambda = 254$  nm,  $t(\text{major}) = 13.25$  min,  $t(\text{minor}) = 16.43$  min];  $^1\text{H}$  NMR (400 MHz,  $\text{CDCl}_3$ ):  $\delta$  7.65 (d,  $J = 8.4$  Hz, 1H), 7.57 (d,  $J = 8.4$  Hz, 2H), 7.25-7.18 (m, 3H), 7.08-7.02 (m, 2H), 4.45-4.41 (m, 1H), 3.82 (dd,  $J = 3.6, 10.0$  Hz, 1H), 3.41 (t,  $J = 10.4$  Hz, 1H), 2.94-2.90 (m, 2H), 2.36 (s, 3H);  $^{13}\text{C}$  NMR (75.5 MHz,  $\text{CDCl}_3$ ):  $\delta$  144.3, 141.1, 134.5, 130.6, 129.8, 127.9, 127.1, 125.3, 124.9, 116.9, 62.2, 35.9, 33.2, 21.6; IR (neat): 3031, 2923, 1598, 1479, 1355, 1168, 1092, 1026, 758  $\text{cm}^{-1}$ ; HRMS (ESI) calcd for  $[\text{M}+\text{Na}]^+ \text{C}_{16}\text{H}_{16}\text{O}_2\text{NBrSNa}$  387.9977, found 387.9986.

#### Procedure for the catalytic enantioselective aminohalogenation on a 0.5 g scale:

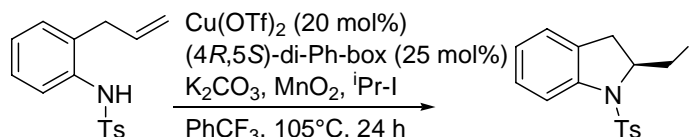

#### (*S*)-2-(Iodomethyl)-1-tosylindoline (**4a**)

Copper (II) triflate (125.2 mg, 0.346 mmol) was added to an oven dried pressure tube (60 mL) equipped with a stir bar, in a glovebox. Upon removal from the glovebox the pressure tube was flushed with argon any time it was opened. To the tube, (*4R,5S*)-di-Ph-box ligand (**3**) (211.4 mg, 0.434 mmol) was added and the mixture was dissolved in  $\text{PhCF}_3$  (17.0 mL), the tube was then sealed and heated to 60 °C for 2 h in an oil bath with stirring. The following reagents were then added sequentially: *N*-(2-allylphenyl)-4-methylbenzenesulfonamide<sup>5</sup> (504.6 mg, 1.756 mmol),  $\text{MnO}_2$  (611.3 mg, 7.031 mmol),  $\text{K}_2\text{CO}_3$  (242.8 mg, 1.757 mmol), *i*Pr-I (2.11 mL, 3.59 g, 21.1 mmol) and ~340 mg of flame activated 4Å molecular sieves. Once all reagents were added the tube was flushed with argon, sealed, and sonicated to ensure that all reagents were in solution. The reaction was then stirred at 105 °C (oil bath) for 24 h. The tube was then allowed to come to rt and the mixture was filtered through a pad of Celite with EtOAc. The filtrate was collected and the solvent was removed *in vacuo* to yield the crude product as a solid. Flash chromatography of the resulting crude material on  $\text{SiO}_2$  (0-20% v/v EtOAc in hexanes gradient) afforded the corresponding indoline **4a** (537.0 mg, 1.30 mmol) in 74% yield and 88% ee. Further purification by HPLC 10% EtOAc in hexanes, isocratic, was used prior to chiral HPLC analysis. The ee was further enriched to >98% via recrystallization from  $\text{CH}_2\text{Cl}_2$ /hexanes.

#### Procedure for the catalytic enantioselective aminohalogenation of **1d** on a 0.25 g scale:

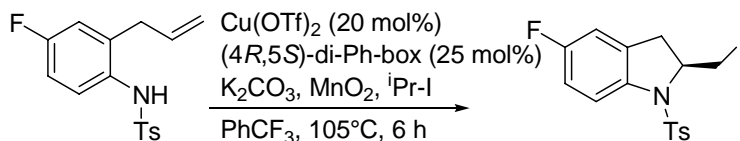

#### (*S*)-5-Fluoro-2-(iodomethyl)-1-tosylindoline (**4d**)

Copper (II) triflate (59.7 mg, 0.165 mmol) was added to an oven dried pressure tube (40 mL) equipped with a stir bar, in a glovebox. Upon removal from the glovebox the pressure tube was flushed with argon any time it was opened. To the tube, (*4R,5S*)-di-Ph-box ligand (**3**) (100.7 mg, 0.207 mmol) was added and the mixture was dissolved in  $\text{PhCF}_3$  (8.2 mL), the tube was then sealed and heated to 60 °C for 2 h in an oil bath with stirring. The following reagents were then added sequentially: *N*-(2-Allyl-4-fluorophenyl)-4-methylbenzenesulfonamide (**1d**)<sup>6</sup> (252.5 mg, 0.827 mmol),  $\text{MnO}_2$  (216.3 mg, 2.488 mmol),  $\text{K}_2\text{CO}_3$  (114.3 mg, 0.827 mmol), *i*Pr-I (0.75 mL, 1.28 g, 7.50 mmol) and ~164 mg of flame activated 4Å molecular sieves. Once all reagents were added the tube was flushed with argon, sealed, and sonicated to ensure that all reagents were in solution. The reaction was then stirred at 105 °C (oil bath) for 6 h. The tube was then allowed to come to rt and the mixture was filtered through a pad of Celite with EtOAc. The filtrate was collected and the solvent was removed *in vacuo* to yield the crude product as a solid. Flash chromatography of the resulting crude material on  $\text{SiO}_2$  (0-20% v/v EtOAc in hexanes gradient)

afforded the corresponding indoline **4d** (267.0 mg, 0.619 mmol) in 75% yield and 92% ee. Further purification by HPLC 10% EtOAc in hexanes, isocratic, was used prior to chiral HPLC analysis.

### Catalytic Methods for 4-Pentenyl Sulfonamide Substrates:

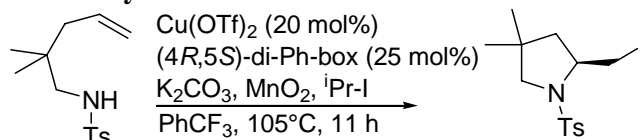

#### (S)-2-(Iodomethyl)-4,4-dimethyl-1-tosylpyrrolidine (**8a**) (Representative procedure)

Copper (II) triflate (13.9 mg, 0.039 mmol) was added to an oven dried pressure tube (10 mL) equipped with a stir bar, in a glovebox. Upon removal from the glovebox the pressure tube was flushed with argon any time it was opened. To the tube, (4*R*,5*S*)-di-Ph-box ligand (**3**) (21.0 mg, 0.043 mmol) was added and the mixture was dissolved in PhCF<sub>3</sub> (1.73 mL), the tube was then sealed and heated to 60 °C for 2 h in an oil bath with stirring. The following reagents were then added sequentially: *N*-(2, 2-dimethyl-pent-4-enyl)-4-methyl-benzenesulfonamide (**7a**)<sup>12</sup>(51.5 mg, 0.193 mmol), MnO<sub>2</sub> (45.1 mg, 0.518 mmol), K<sub>2</sub>CO<sub>3</sub> (23.9 mg, 0.173 mmol), <sup>1</sup>iPr-I (0.103 mL, 175.1 mg, 1.03 mmol) and ~35 mg of flame activated 4Å molecular sieves. Once all reagents were added the tube was flushed with argon, sealed, and sonicated to ensure that all reagents were in solution. The reaction was then stirred at 105 °C (oil bath) for 11 h. The tube was then allowed to come to rt and the mixture was filtered through a pad of Celite with EtOAc. The filtrate was collected and the solvent was removed *in vacuo* to yield the crude product as a solid. Flash chromatography of the resulting crude material on SiO<sub>2</sub> (0-20% v/v EtOAc in hexanes gradient) afforded the corresponding pyrrolidine **8a** in 81% yield. Further purification using HPLC (10% EtOAc in hexanes, isocratic) was performed prior to chiral HPLC analysis.

Pyrrolidine **8a** (61.3 mg, 0.156 mmol) was obtained as an oil in 81% yield from *N*-(2, 2-dimethyl-pent-4-enyl)-4-methyl-benzenesulfonamide (**7a**)<sup>12</sup>(51.5 mg, 0.193 mmol): mp = 65-67 °C; [α]<sub>D</sub><sup>24</sup> = -110.0 ° (c = 0.5, CHCl<sub>3</sub>), ee = 88%, determined by HPLC analysis [Chiralpak AD-RH, 4% IPA/hexane, 1 mL/min, λ = 254 nm, t(major) = 7.34 min, t(minor) = 8.61 min]; <sup>1</sup>H NMR (400 MHz, CDCl<sub>3</sub>): δ 7.74 (d, J = 8.4 Hz, 2H), 7.33 (d, J = 8.0 Hz, 2H), 3.77 (dd, J = 2.8, 9.2 Hz, 1H), 3.74-3.65 (m, 1H), 3.37 (apparent t, J = 8.8 Hz, 1H), 3.21 (apparent t, J = 8.8 Hz, 2H), 2.44 (s, 3H), 1.92 (dd, J = 7.6, 12.8 Hz, 1H), 1.60 (dd, J = 8.4, 12.8 Hz, 1H), 1.05 (s, 3H), 0.51 (s, 3H); <sup>13</sup>C NMR (75.5 MHz, CDCl<sub>3</sub>): δ 143.7, 134.9, 129.7, 127.5, 62.0, 60.1, 47.8, 37.5, 26.0, 25.8, 21.5, 13.2; IR (neat): 3029, 2958, 1598, 1465, 1347, 1157, 1092, 816, 662 cm<sup>-1</sup>; HRMS (ESI) calcd for [M+1]<sup>+</sup> C<sub>14</sub>H<sub>21</sub>O<sub>2</sub>NIS 394.0332, found 394.0336.

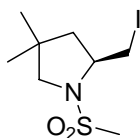

#### (S)-2-(Iodomethyl)-4,4-dimethyl-1-(methylsulfonyl)pyrrolidine (**8b**)

Pyrrolidine **8b** (49.8 mg, 0.157 mmol) was obtained as a white solid in a 78% yield from the corresponding sulfonamide<sup>16</sup> **7b** (38.5 mg, 0.201 mmol): mp = 79-80 °C; [α]<sub>D</sub><sup>24</sup> = -16.7 ° (c = 0.5, CHCl<sub>3</sub>), ee = 43%, determined by HPLC analysis [Chiralpak AD-RH, 2% water/MeOH, 1 mL/min, λ = 254 nm, t(minor) = 3.57 min, t(major) = 4.09 min]; <sup>1</sup>H NMR (400 MHz, CDCl<sub>3</sub>): δ 3.88-3.82 (m, 1H), 3.55-3.47 (m, 2H), 3.24 (ABq, J<sub>AB</sub> = 10.0 Hz, Δν = 60.4 Hz, 2H), 2.95 (s, 3H), 2.04-1.98 (m, 1H), 1.70-1.64 (m, 1H), 1.14 (s, 3H), 1.09 (s, 3H); <sup>13</sup>C NMR (75.5 MHz, CDCl<sub>3</sub>): δ 61.4, 59.4, 47.3, 39.4, 38.0, 26.5, 25.7, 13.7; IR (neat): 2958, 1466, 1331, 1148, 1050, 963 cm<sup>-1</sup>; HRMS (ESI) calcd for [M+Na]<sup>+</sup> C<sub>8</sub>H<sub>16</sub>O<sub>2</sub>NISNa 339.9839, found 339.9847.

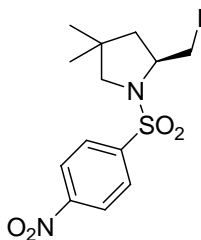

**(S)-2-(Iodomethyl)-4,4-dimethyl-1-((4-nitrophenyl)sulfonyl)pyrrolidine (8c)**

Pyrrolidine **8c** (61.7 mg, 0.146 mmol) was obtained as pale yellow crystals in a 80% yield from *N*-(2, 2-dimethyl-pent-4-enyl)-4-nitro-benzenesulfonamide (**7c**)<sup>17</sup> (54.4 mg, 0.182 mmol), the reaction time was increased to 24 h for this reaction: mp = 93-95°C;  $[\alpha]_D^{24} = -51.1^\circ$  ( $c = 1.00$ , CHCl<sub>3</sub>), ee = 60%, determined by HPLC analysis [Chiralpak AD-RH, 2% IPA/Hex, 1 mL/min,  $\lambda = 254$  nm, t(major) = 15.27 min, t(minor) = 20.06 min]; <sup>1</sup>H NMR (400 MHz, CDCl<sub>3</sub>):  $\delta$  8.38 (d,  $J = 12.8$  Hz, 2H), 8.05 (d,  $J = 12.0$  Hz, 2H), 3.81-3.75 (m, 1H), 3.65 (dd,  $J = 2.8, 10.0$  Hz, 1H), 3.44 (dd,  $J = 8.0$  Hz, 9.6 Hz, 1H), 3.28-3.20 (m, 2H), 1.95 (dd,  $J = 7.2, 12.8$  Hz, 1H), 1.65 (dd,  $J = 8.4, 12.8$  Hz, 1H), 1.08 (s, 3H), 0.63 (s, 3H); <sup>13</sup>C NMR (75.5 MHz, CDCl<sub>3</sub>):  $\delta$  150.1, 144.3, 128.5, 124.4, 61.9, 60.2, 47.4, 37.9, 26.0, 25.6, 12.7; IR (neat): 3104, 2960, 2875, 1605, 1530, 1349, 1161, 1091, 856, 743, 615 cm<sup>-1</sup>; HRMS (ESI) calcd for [M-I]<sup>+</sup> C<sub>13</sub>H<sub>17</sub>O<sub>4</sub>N<sub>2</sub>S 297.0900, found 297.1000.

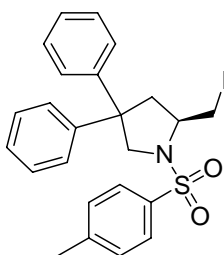

**(S)-2-(Iodomethyl)-4,4-diphenyl-1-tosylpyrrolidine (8d)**

Pyrrolidine **8d** (75.9 mg, 0.147 mmol) was obtained as white crystals in 85% yield from *N*-(2, 2-diphenyl-pent-4-enyl)-4-methyl-benzenesulfonamide (**7d**)<sup>14</sup> (67.6 mg, 0.173 mmol): mp = 78-80°C;  $[\alpha]_D^{24} = 6.7^\circ$  ( $c = 0.5$ , CHCl<sub>3</sub>), ee = 93%, determined by HPLC analysis [Chiralpak AD-RH, 2% IPA/hexane, 0.5 mL/min,  $\lambda = 254$  nm, t(minor) = 29.47 min, t(major) = 31.39 min]; <sup>1</sup>H NMR (500 MHz, CDCl<sub>3</sub>):  $\delta$  7.60 (d,  $J = 8.0$  Hz, 2H), 7.30-7.07 (m, 12H), 4.43 (d,  $J = 10.0$  Hz, 1H), 3.88-3.84 (m, 1H), 3.75 (d,  $J = 10.0$  Hz, 1H), 3.67 (dd,  $J = 3.0, 9.5$  Hz, 1H), 2.85-2.78 (m, 2H), 2.66 (dd,  $J = 5.0, 13.0$  Hz, 1H), 2.40 (s, 3H); <sup>13</sup>C NMR (75.5 MHz, CDCl<sub>3</sub>):  $\delta$  144.6, 144.4, 143.6, 134.0, 129.8, 128.7, 128.6, 127.4, 126.8, 126.6, 126.5, 126.3, 60.4, 59.2, 52.2, 43.8, 21.5, 11.3; IR (neat): 3026, 2962, 1598, 1495, 1448, 1344, 1262, 1162, 1091, 1029, 813, 753, 701, 665 cm<sup>-1</sup>; HRMS (ESI) calcd for [M+1]<sup>+</sup> C<sub>24</sub>H<sub>25</sub>O<sub>2</sub>NIS 518.0645, found 518.0658.

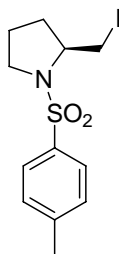

**(S)-2-(Iodomethyl)-1-tosylpyrrolidine (8e)**

Pyrrolidine **8e** (49.7 mg, 0.136 mmol) was obtained as a white solid in a 77% yield from *N*-(pent-4-enyl)-4-methyl-benzenesulfonamide (**7e**)<sup>5</sup> (42.3 mg, 0.177 mmol): mp = 89-91°C;  $[\alpha]_D^{24} = -103.2^\circ$  ( $c = 0.5$ , CHCl<sub>3</sub>), ee = 73%, determined by HPLC analysis [Chiralpak AD-RH, 2% IPA/hexane, 1 mL/min,  $\lambda = 254$  nm, t(major) = 10.85 min, t(minor) = 12.73 min]; <sup>1</sup>H NMR (400 MHz, CDCl<sub>3</sub>):  $\delta$  7.73 (d,  $J = 8.4$  Hz, 2H), 7.34 (d,  $J = 8.0$  Hz, 2H), 3.77-3.72 (m, 1H), 3.62 (dd,  $J = 2.8, 9.6$  Hz, 1H), 3.51-3.47 (m, 1H), 3.25-

3.16 (m, 2H), 2.44 (s, 3H), 1.91-1.80 (m, 3H), 1.56-1.50 (m, 1H);  $^{13}\text{C}$  NMR (75.5 MHz,  $\text{CDCl}_3$ ):  $\delta$  143.8, 134.2, 129.8, 127.5, 60.7, 50.1, 32.0, 23.8, 21.6, 11.5; IR (neat): 3027, 2971, 1597, 1448, 1346, 1159, 1092, 986, 816, 665  $\text{cm}^{-1}$ ; HRMS (EI) calcd for  $[\text{M}]^+ \text{C}_{12}\text{H}_{16}\text{O}_2\text{NIS}$  364.9941, found 364.9952.

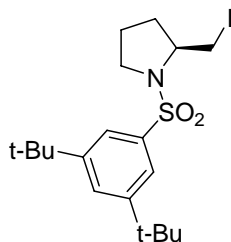

**(S)-1-((3,5-Di-tert-butylphenyl)sulfonyl)-2-(iodomethyl)pyrrolidine (8f)**

Pyrrolidine **8f** (58.3 mg, 0.126 mmol) was obtained as white crystals in 85% yield from the corresponding sulfonamide **7f** (50.0 mg, 0.148 mmol): mp = 94-95°C;  $[\alpha]_{\text{D}}^{24} = -63.8^\circ$  ( $c = 1.00$ ,  $\text{CHCl}_3$ ), ee = 82%, determined by HPLC analysis [Regis (*S,S*) Whelk-O 1, 2% IPA/hexane, 1.0 mL/min,  $\lambda = 254$  nm,  $t(\text{major}) = 9.30$  min,  $t(\text{minor}) = 10.59$  min];  $^1\text{H}$  NMR (400 MHz,  $\text{CDCl}_3$ ):  $\delta$  7.66-7.64 (m, 3H), 3.78-3.71 (m, 1H), 3.61 (dd,  $J = 2.8, 9.6$  Hz, 1H), 3.49-3.44 (m, 1H), 3.27-3.17 (m, 2H), 1.89-1.81 (m, 3H), 1.55-1.50 (m, 1H), 1.36 (s, 18H);  $^{13}\text{C}$  NMR (75.5 MHz,  $\text{CDCl}_3$ ):  $\delta$  152.3, 136.7, 126.9, 121.6, 60.7, 50.0, 35.1, 32.1, 31.3, 39.9, 23.9, 11.7; IR (neat): 3067, 2963, 1599, 1476, 1348, 1248, 1164, 1114, 1024, 985, 789  $\text{cm}^{-1}$ ; HRMS (ESI) calcd for  $[\text{M}+\text{Na}]^+ \text{C}_{19}\text{H}_{30}\text{O}_2\text{NISNa}$  486.0934, found 486.0935.

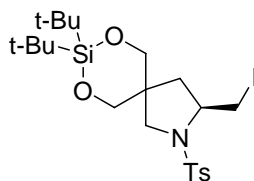

**(S)-8,8-Di-tert-butyl-3-(iodomethyl)-2-tosyl-7,9-dioxa-2-aza-8-silaspiro[4.5]decane (8g)**

Pyrrolidine **8g** (35.0 mg, 0.062 mmol) was obtained as white crystals in 78% yield from the corresponding sulfonamide **7g**<sup>4</sup> (34.9 mg, 0.079 mmol): mp = 123-125°C;  $[\alpha]_{\text{D}}^{24} = -25.6^\circ$  ( $c = 0.23$ ,  $\text{CHCl}_3$ ), ee = 92%, determined by HPLC analysis [Regis (*S,S*) Whelk-O 1, 4% IPA/hexane, 1.0 mL/min,  $\lambda = 254$  nm,  $t(\text{major}) = 15.77$  min,  $t(\text{minor}) = 18.98$  min];  $^1\text{H}$  NMR (400 MHz,  $\text{CDCl}_3$ ):  $\delta$  7.73 (d,  $J = 8.0$  Hz, 2H), 7.35 (d,  $J = 8.0$  Hz, 2H), 3.94 (ABq,  $J_{\text{AB}} = 10.8$ ,  $\Delta\nu = 42.3$  Hz, 2H), 3.73-3.38 (m, 2H), 3.33 (ABq,  $J_{\text{AB}} = 11.6$ ,  $\Delta\nu = 165.4$  Hz, 2H), 3.40-3.33 (m, 2H), 2.46 (s, 3H), 1.96 (dd,  $J = 7.6, 14$  Hz, 1H), 1.53 (dd,  $J = 7.6, 14$  Hz, 1H), 1.02 (s, 18H);  $^{13}\text{C}$  NMR (75.5 MHz,  $\text{CDCl}_3$ ):  $\delta$  144.1, 134.1, 129.9, 127.5, 71.6, 69.7, 59.1, 56.1, 45.3, 39.9, 29.7, 28.0, 27.5, 22.6, 21.6, 21.2, 12.9; IR (neat): 3010, 2928, 1599, 1471, 1348, 1160, 1064, 909, 824, 764  $\text{cm}^{-1}$ ; HRMS (ESI) calcd for  $[\text{M}+1]^+ \text{C}_{22}\text{H}_{37}\text{O}_4\text{NISI}$  566.1252, found 566.1267.



### Assignment of Absolute Stereochemistry of Pyrrolidine Products:

The crystal structure of pyrrolidine **8g** (CCDC 858585) showing the *S* stereochemistry was obtained by William W. Brennessel at the University of Rochester. The absolute configuration of all other pyrrolidine products was assigned by analogy to this structure.

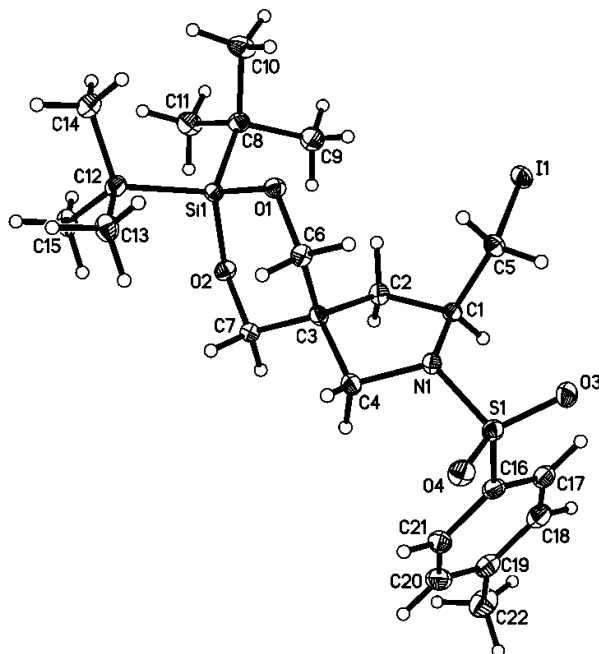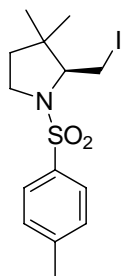

### (*S*)-2-(Iodomethyl)-3,3-dimethyl-1-tosylpyrrolidine (**10**)

Pyrrolidine **10** (52.5 mg, 0.134 mmol) was obtained as a white solid in a 78% yield from *N*-(3,3-dimethylpent-4-enyl)-4-methylbenzenesulfonamide (**9**)<sup>19</sup> (45.8 mg, 0.171 mmol): mp = 61–63°C;  $[\alpha]_D^{24} = -67.1^\circ$  ( $c = 0.5$ ,  $\text{CHCl}_3$ ), ee = 82%, determined by HPLC analysis [Chiralpak AD-RH, 2% IPA/hexane, 1 mL/min,  $\lambda = 254$  nm,  $t(\text{major}) = 9.21$  min,  $t(\text{minor}) = 10.69$  min];  $^1\text{H}$  NMR (400 MHz,  $\text{CDCl}_3$ ):  $\delta$  7.75 (d,  $J = 8.0$  Hz, 2H), 7.29 (d,  $J = 8.0$  Hz, 2H), 3.51–3.33 (m, 4H), 3.13–3.08 (m, 1H), 2.44 (s, 3H), 2.03–1.98 (m, 1H), 1.35–1.31 (m, 1H), 1.16 (s, 3H), 0.52 (s, 3H);  $^{13}\text{C}$  NMR (75.5 MHz,  $\text{CDCl}_3$ ):  $\delta$  143.7, 134.1, 129.6, 127.6, 67.7, 46.3, 42.1, 37.6, 28.5, 22.8, 21.6, 7.8; IR (neat): 3031, 2962, 1598, 1466, 1345, 1163, 1094, 1050, 816, 665  $\text{cm}^{-1}$ ; HRMS (EI) calcd for  $[\text{M}]^+ \text{C}_{14}\text{H}_{20}\text{O}_2\text{NIS}$  393.0254, found 393.0244.

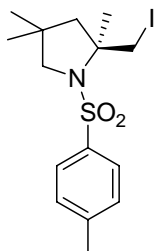

### (*S*)-2-(Iodomethyl)-2,4,4-trimethyl-1-tosylpyrrolidine (**12**)

Pyrrolidine **12** (52.1 mg, 0.128 mmol) was obtained as a yellow oil in a 74% yield from *N*-(2,2,4-trimethyl-pent-4-enyl)-4-methyl-benzenesulfonamide (**11**)<sup>15</sup> (48.8 mg, 0.173 mmol):  $[\alpha]_D^{24} = 7.2^\circ$  ( $c = 0.67$ ,  $\text{CHCl}_3$ ),  $ee = 16\%$ , determined by HPLC analysis [Chiralpak AD-RH, 2% IPA/hexane, 1 mL/min,  $\lambda = 254$  nm,  $t(\text{major}) = 7.56$  min,  $t(\text{minor}) = 8.98$  min];  $^1\text{H NMR}$  (400 MHz,  $\text{CDCl}_3$ ):  $\delta$  7.75 (d,  $J = 8.0$  Hz, 2H), 7.29 (d,  $J = 8.0$  Hz, 2H), 3.74 (ABq,  $J_{AB} = 10.0$  Hz,  $\Delta\nu = 72.3$  Hz, 2H), 3.17 (ABq,  $J_{AB} = 9.2$  Hz,  $\Delta\nu = 39.1$  Hz, 2H), 2.43 (s, 3H), 1.90 (ABq,  $J_{AB} = 12.8$  Hz,  $\Delta\nu = 186.6$  Hz, 2H), 1.71 (s, 3H), 1.08 (s, 3H), 0.96 (s, 3H);  $^{13}\text{C NMR}$  (75.5 MHz,  $\text{CDCl}_3$ ):  $\delta$  143.1, 137.7, 129.5, 127.4, 67.3, 62.1, 55.3, 36.1, 27.4, 27.1, 25.9, 21.5, 19.8; IR (neat): 3027, 2957, 1598, 1448, 1338, 1212, 1155, 1092, 1044, 970, 815, 713, 659  $\text{cm}^{-1}$ ; HRMS (EI) calcd for  $[\text{M}]^+ \text{C}_{15}\text{H}_{22}\text{O}_2\text{NIS}$  407.0410, found 407.0403.

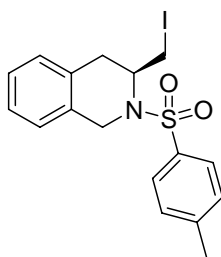

#### (*S*)-3-(Iodomethyl)-2-tosyl-1,2,3,4-tetrahydroisoquinoline (**14**)

Tetrahydroisoquinoline **14** (54.6 mg, 0.128 mmol) was obtained as a yellow oil in a 73% yield from *N*-(2-allylbenzyl)-4-methylbenzenesulfonamide (**13**)<sup>5</sup> (52.8 mg, 0.175 mmol). The (*R,R*)-Ph-box ligand (**2**) was used for this reaction:  $[\alpha]_D^{24} = 29.2^\circ$  ( $c = 0.37$ ,  $\text{CHCl}_3$ ),  $ee = 27\%$ , determined by HPLC analysis [Regis (*S,S*) Whelk-O 1, 4% IPA/hexane, 1 mL/min,  $\lambda = 254$  nm,  $t(\text{major}) = 28.09$  min,  $t(\text{minor}) = 34.05$  min];  $^1\text{H NMR}$  (400 MHz,  $\text{CDCl}_3$ ):  $\delta$  7.70 (d,  $J = 8.0$  Hz, 2H), 7.27-7.25 (m, 2H), 7.18-7.16 (m, 2H), 7.10-7.05 (m, 2H), 4.39 (ABq,  $J_{AB} = 15.6$  Hz,  $\Delta\nu = 21.3$  Hz, 2H), 4.34-4.31 (m, 1H), 3.28 (dd,  $J = 3.6, 6.0$  Hz, 1H), 3.08 (dd,  $J = 3.2, 16.0$  Hz, 1H), 2.96 (apparent t,  $J = 10.4$  Hz, 1H), 2.82 (dd,  $J = 5.2, 12.8$  Hz, 1H), 2.40 (s, 3H);  $^{13}\text{C NMR}$  (75.5 MHz,  $\text{CDCl}_3$ ):  $\delta$  143.7, 135.8, 131.9, 131.8, 129.8, 129.1, 127.5, 127.3, 126.8, 126.1, 53.8, 44.5, 31.9, 21.5, 7.4; IR (neat): 3027, 2922, 1598, 1495, 1456, 1335, 1161, 1091, 1038, 907, 814, 745, 664  $\text{cm}^{-1}$ ; HRMS (ESI) calcd for  $[\text{M}+1]^+ \text{C}_{17}\text{H}_{19}\text{O}_2\text{NIS}$  428.0176, found 428.0169. The absolute stereochemistry of **14** was assigned by analogy to **8e**.

#### Assignment of Relative Stereochemistry of Pyrrolidine Product **16**:

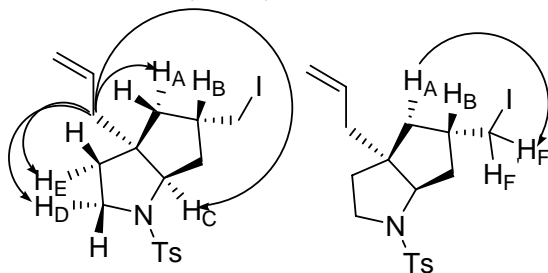

#### (3*aR*,5*S*,6*aR*)-3*a*-allyl-5-(iodomethyl)-1-tosyl-octahydrocyclopenta[*b*]pyrrole (**16**)

Pyrrolidine **16** (52.6 mg, 0.118 mol) was obtained as a clear oil in a 70% yield from the corresponding sulfonamide **15** (53.9 mg, 0.169 mmol). The stereochemistry of  $\text{H}_C$  was assigned by analogy to crystal structure **8g**. An nOe experiment showing a strong signal between the allyl methylene protons and  $\text{H}_C$  was used to assign the stereochemistry of the quaternary carbon center, this experiment also showed a strong signal between the allyl methylene protons and  $\text{H}_A$ . The stereochemistry of the last chiral center was assigned based on an nOe experiment showing a strong signal between  $\text{H}_A$  and  $\text{H}_F$ :  $[\alpha]_D^{24} = -25.5^\circ$  ( $c = 0.5$ ,  $\text{CHCl}_3$ ),  $ee = 91\%$ , determined by HPLC analysis [Chiralpak AD-RH, 2% water/MeOH, 1 mL/min,  $\lambda = 254$  nm,  $t(\text{major}) = 4.70$  min,  $t(\text{minor}) = 6.75$  min];  $^1\text{H NMR}$  (400 MHz,  $\text{CDCl}_3$ ):  $\delta$  7.70 (d,  $J = 10.0$  Hz, 2H), 7.33 (d,  $J = 8.0$  Hz, 2H), 5.43-5.36 (m, 1H), 4.90 (d,  $J = 12.0$  Hz, 1H), 4.82 (d,  $J = 18.8$  Hz, 1H), 3.49-3.41 (m, 2H), 3.43-3.23 (m, 1H), 3.16-3.12 (m, 1H), 2.99-2.92 (m, 1H), 2.45 (s, 3H), 2.39-2.32 (m, 2H), 1.86 (dd,  $J = 3.2, 7.6$  Hz, 2H), 1.74-1.62 (m, 3H), 1.47-1.43 (m, 1H), 1.18 (dd,  $J = 11.2, 12.8$  Hz,

1H); <sup>13</sup>C NMR (75.5 MHz, CDCl<sub>3</sub>): δ 143.6, 133.8, 133.2, 129.6, 127.9, 118.4, 69.3, 54.2, 48.9, 45.0, 43.8, 41.2, 40.1, 36.0, 21.5, 11.1; IR (neat): 3070, 2948, 1639, 1598, 1451, 1344, 1162, 1093, 919, 816, 657 cm<sup>-1</sup>; HRMS (ESI) calcd for [M+1]<sup>+</sup> C<sub>18</sub>H<sub>25</sub>O<sub>2</sub>NIS 446.0645, found 446.0638.

### Substitution and Cross-Coupling Reactions:

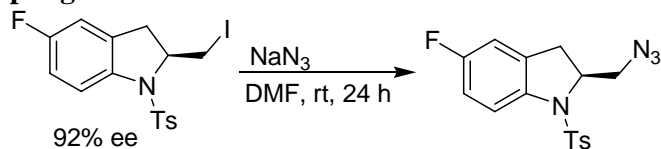

#### (S)-2-(Azidomethyl)-5-fluoro-1-tosylindoline (17)

To an oven dried flask with a stir bar, under argon, was added (S)-5-fluoro-2-(iodomethyl)-1-tosylindoline (**4d**) (44.8 mg, 0.104 mmol, 92% ee), sodium azide (20.5 mg, 0.315 mmol) and 1.05 mL of DMF. The flask was then allowed to stir under an inert atmosphere at room temperature for 24 h. The reaction mixture was then filtered through a pad of Celite with ethyl acetate. The filtrate was collected and the solvent removed *in vacuo* providing 79.1 mg of crude material. The crude product was further purified via flash chromatography on SiO<sub>2</sub> (0-30% EtOAc in hexanes eluent) providing pure alkyl azide **17** (35.3 mg, 0.102 mmol) as white crystals in 98% yield: mp = 98-99 °C; [α]<sub>D</sub><sup>24</sup> = 144.2° (c = 0.85, CHCl<sub>3</sub>), ee = 92%, determined by HPLC analysis [Regis (S,S) Whelk-O 1, 2% IPA/hexane, 1.0 mL/min, λ = 254 nm, t(major) = 20.71 min, t(minor) = 24.96 min]; <sup>1</sup>H NMR (400 MHz, CDCl<sub>3</sub>): δ 7.62 (dd, J = 4.8, 8.4 Hz, 1H), 7.51 (d, J = 8.0 Hz, 2H), 7.19 (d, J = 8.4 Hz, 2H), 6.95 (td, J = 2.4, 8.8 Hz, 1H), 6.76 (dd, J = 2.8, 8.0 Hz, 1H), 4.39-4.29 (m, 1H), 3.60-3.50 (m, 2H), 2.80-2.65 (m, 2H), 2.37 (s, 3H); <sup>13</sup>C NMR (75.5 MHz, CDCl<sub>3</sub>): δ 160.6 (d, J = 244.2 Hz), 144.4, 137.3, 134.2, 133.5 (d, J = 8.1 Hz), 129.8, 127.1, 118.5 (d, J = 8.1 Hz), 114.6 (d, J = 24.2 Hz), 112.3 (d, J = 24.2 Hz), 61.5, 55.2, 32.1, 21.6; IR (neat): 3030, 2924, 1599, 1482, 1356, 1166, 1091, 893, 815 cm<sup>-1</sup>; HRMS (ESI) calcd for [M+Na]<sup>+</sup> C<sub>16</sub>H<sub>15</sub>O<sub>2</sub>N<sub>4</sub>FSNa 369.0792, found 369.0799.

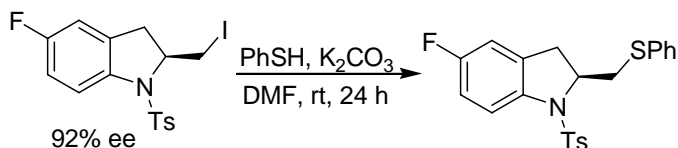

#### (S)-5-Fluoro-2-(phenylthiomethyl)-1-tosylindoline (18)

To an oven dried flask with a stir bar, under argon, was added (S)-5-fluoro-2-(iodomethyl)-1-tosylindoline (**4d**) (44.1 mg, 0.102 mmol, 92% ee), thiophenol (31 μL, 33.4 mg, 0.303 mmol), K<sub>2</sub>CO<sub>3</sub> (14.5 mg, 0.105 mmol) and 1.00 mL of DMF. The flask was then allowed to stir under an inert atmosphere at room temperature for 24 h. The reaction mixture was then filtered through a pad of Celite with ethyl acetate, the filtrate was collected and the solvent removed *in vacuo* providing 146.4 mg of crude material. The crude product was further purified via flash chromatography on SiO<sub>2</sub> (0-30% EtOAc in hexanes eluent). Indoline **18** (41.3 mg, 0.100 mmol) was obtained as a clear oil in 98% yield: [α]<sub>D</sub><sup>24</sup> = -15.5° (c = 0.57, CHCl<sub>3</sub>), ee = 92%, determined by HPLC analysis [Chiralpak AD-RH, 2% IPA/hexane, 1.0 mL/min, λ = 254 nm, t(major) = 21.11 min, t(minor) = 14.21 min]; <sup>1</sup>H NMR (400 MHz, CDCl<sub>3</sub>): δ 7.59 (dd, J = 4.8, 8.4 Hz, 1H), 7.44 (d, J = 7.6 Hz, 2H), 7.39-7.34 (m, 4H), 7.27-7.23 (m, 1H), 7.11 (d, J = 8.0 Hz, 2H), 6.91 (td, J = 2.4, 9.2 Hz, 1H), 6.74 (dd, J = 2.8, 8.0 Hz, 1H), 4.30-4.22 (m, 1H), 3.67 (dd, J = 3.6, 13.6 Hz, 1H), 2.92-2.73 (m, 3H), 2.34 (s, 3H); <sup>13</sup>C NMR (75.5 MHz, CDCl<sub>3</sub>): δ 160.4 (d, J = 243.2 Hz), 144.1, 137.2 (d, J = 2.3 Hz), 134.7, 134.2, 133.3 (d, J = 9.2 Hz), 129.6, 129.1 (d, J = 2.3 Hz), 126.9, 126.3, 118.2 (d, J = 8.1 Hz), 114.5 (d, J = 24.2 Hz), 112.4 (d, J = 24.2 Hz), 61.2, 38.5, 33.2, 21.5; IR (neat): 3058, 2923, 1599, 1482, 1356, 1166, 1090, 1026, 935, 814 cm<sup>-1</sup>; HRMS (ESI) calcd for [M+Na]<sup>+</sup> C<sub>22</sub>H<sub>20</sub>O<sub>2</sub>NFS<sub>2</sub>Na 436.0812, found 436.0812.

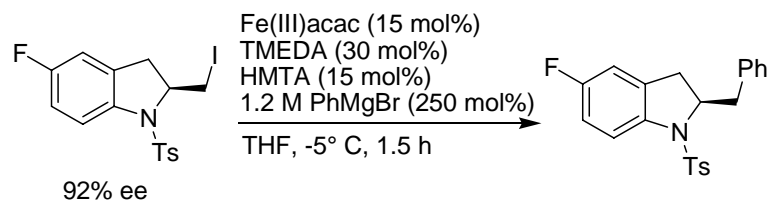

**(R)-2-Benzyl-5-fluoro-1-tosylindoline (19)** was prepared by a procedure analogous to that developed by Cahiez.<sup>22</sup>

To an oven dried flask with a stir bar, under argon, was added  $\text{Fe(acac)}_3$  (5.8 mg, 0.016 mmol), HMTA (2.6 mg, 0.019 mmol), TMEDA (5  $\mu\text{L}$ , 3.9 mg, 0.033 mmol), (*S*)-5-fluoro-2-(iodomethyl)-1-tosylindoline (**4d**) (48.6 mg, 0.113 mmol, 92% ee) and 0.145 mL of THF. The reaction was then stirred and cooled to  $-5^\circ \text{C}$  over the course of a few minutes. Once the mixture had cooled, 1.2M phenyl magnesium bromide (0.203 mL, 0.276 mmol) was added dropwise over an hour. Once the addition was complete the reaction was allowed to stir for an additional 30 minutes before being quenched with aqueous HCl 1M (1.0 mL). The mixture was then extracted with  $\text{Et}_2\text{O}$  (3 x 1.5 mL), the organics were combined and the solvent removed *in vacuo* providing 77.6 mg of crude material. The crude product was further purified via flash chromatography on  $\text{SiO}_2$  (0-20% EtOAc in hexanes eluent) to provide indoline **20** (34.4 mg, 0.090 mmol) as white crystals in 80% yield: mp =  $99\text{-}100^\circ \text{C}$ ;  $[\alpha]_{\text{D}}^{24} = 39.1^\circ$  ( $c = 0.78$ ,  $\text{CHCl}_3$ ), ee = 90%, determined by HPLC analysis [Chiralpak AD-RH, 8% IPA/hexane, 1.0 mL/min,  $\lambda = 254 \text{ nm}$ ,  $t(\text{major}) = 10.91 \text{ min}$ ,  $t(\text{minor}) = 6.12 \text{ min}$ ];  $^1\text{H NMR}$  (400 MHz,  $\text{CDCl}_3$ ):  $\delta$  7.61 (dd,  $J = 4.8, 9.2 \text{ Hz}$ , 1H), 7.53 (d,  $J = 8.4 \text{ Hz}$ , 2H), 7.32-7.21 (m, 5H), 7.16 (d,  $J = 8.0 \text{ Hz}$ , 2H), 6.91 (td,  $J = 2.0, 8.4 \text{ Hz}$ , 1H), 6.69 (dd,  $J = 1.6, 7.6 \text{ Hz}$ , 1H), 4.49-4.43 (m, 1H), 3.30 (dd,  $J = 4.4, 13.6 \text{ Hz}$ , 1H), 2.79 (dd,  $J = 10.0, 13.2 \text{ Hz}$ , 1H), 2.53 (d,  $J = 6.0 \text{ Hz}$ , 2H), 2.35 (s, 3H);  $^{13}\text{C NMR}$  (75.5 MHz,  $\text{CDCl}_3$ ):  $\delta$  160.3 (d,  $J = 243.2 \text{ Hz}$ ), 143.9, 137.4, 137.3, 136.9, 134.9, 134.1 (d,  $J = 9.2 \text{ Hz}$ ), 129.6, 128.5, 126.9, 126.7, 118.6 (d,  $J = 8.1 \text{ Hz}$ ), 114.3 (d,  $J = 23.1 \text{ Hz}$ ), 112.4 (d,  $J = 24.2 \text{ Hz}$ ), 63.9, 42.4, 32.8, 21.5; IR (neat): 3029, 2922, 1599, 1481, 1354, 1165, 1090, 1031, 814  $\text{cm}^{-1}$ ; HRMS (ESI) calcd for  $[\text{M}+\text{Na}]^+ \text{C}_{22}\text{H}_{20}\text{O}_2\text{NFSNa}$  404.1091, found 404.1095.

### Chiral HPLC Traces:

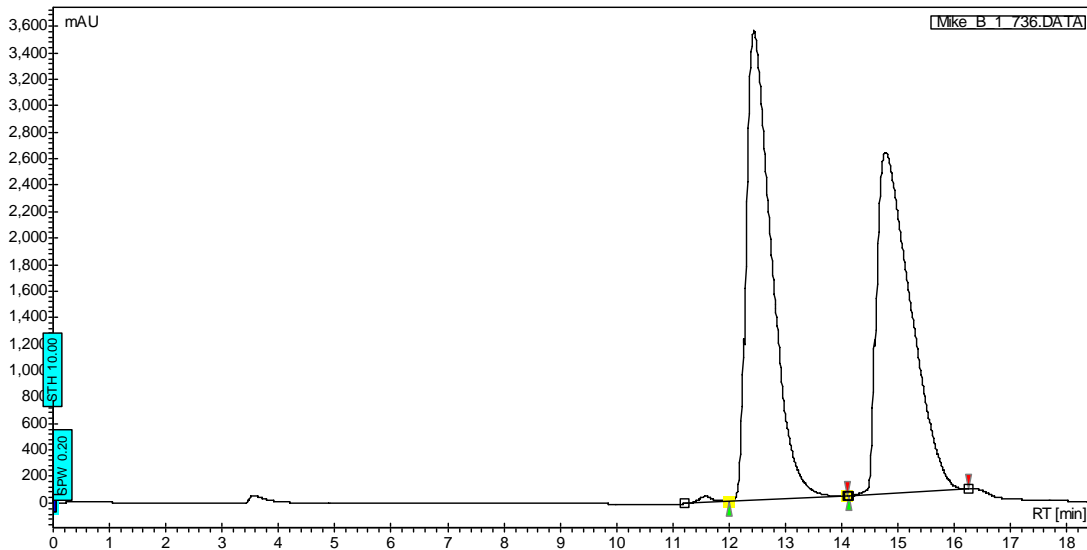

| Time (min) | Area (%) |
|------------|----------|
| 12.44      | 50.403   |
| 14.78      | 49.597   |

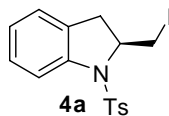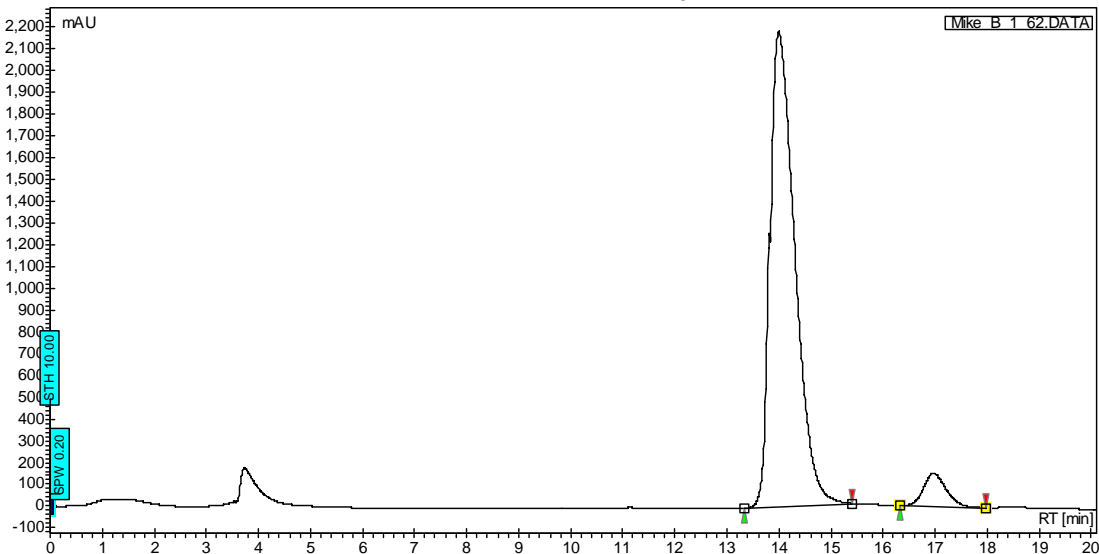

| Time (min) | Area (%) |
|------------|----------|
| 13.99      | 94.037   |
| 16.97      | 5.963    |

0.5 g scale:

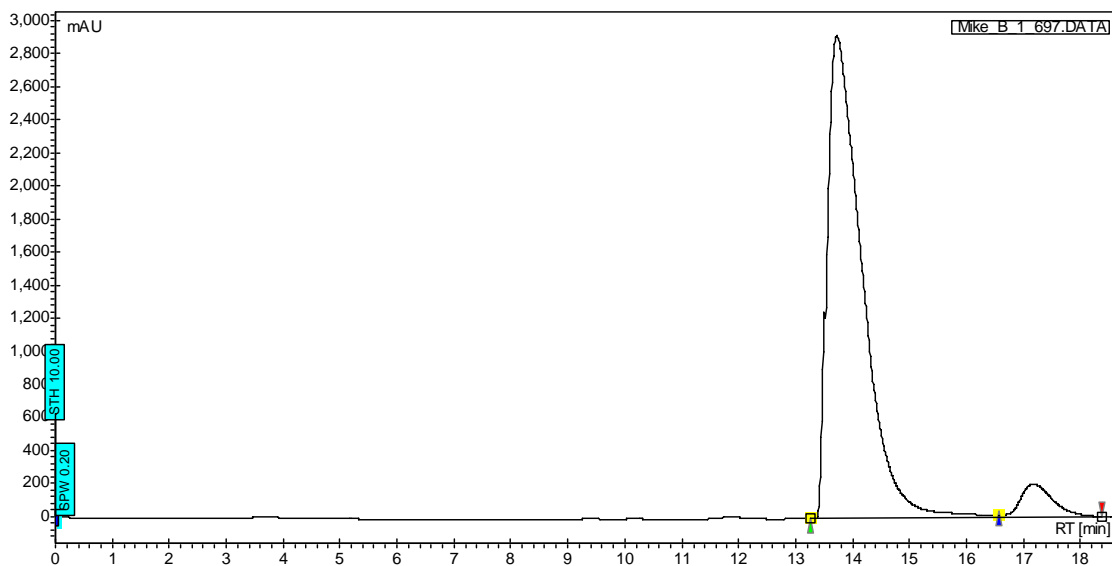

| Time (min) | Area (%) |
|------------|----------|
| 13.73      | 93.931   |
| 17.18      | 6.069    |

After 1 recrystallization:

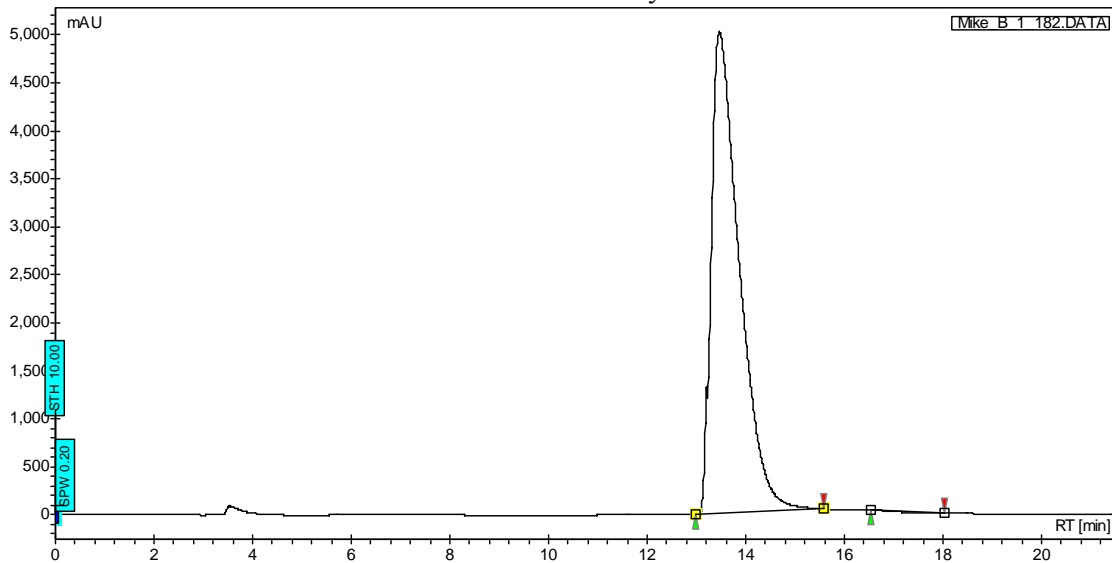

| Time (min) | Area (%) |
|------------|----------|
| 13.47      | 99.824   |
| 17.27      | 0.176    |

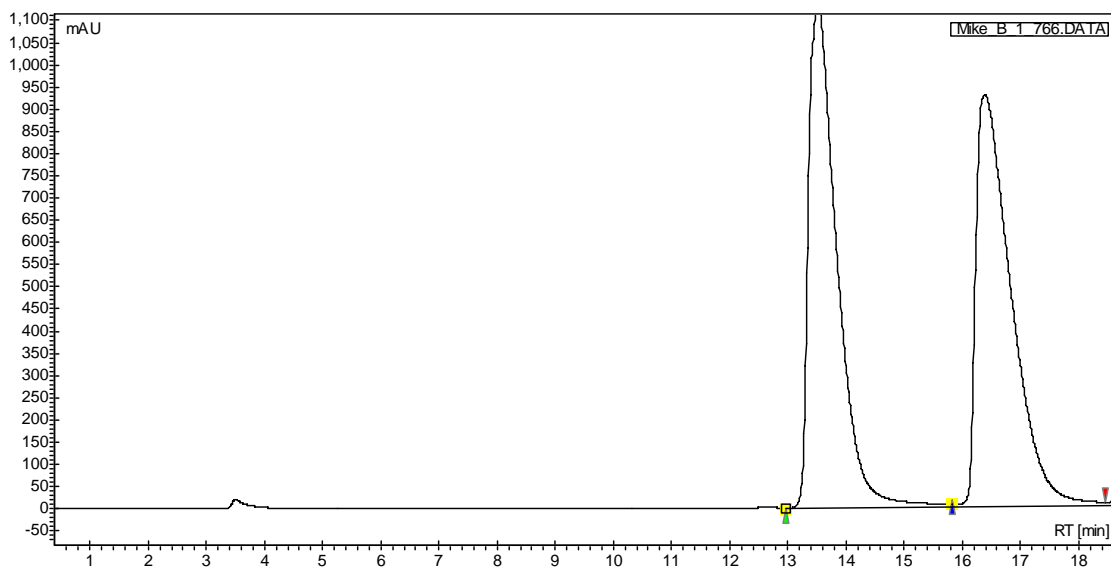

| Time (min) | Area (%) |
|------------|----------|
| 13.5       | 49.526   |
| 16.39      | 50.474   |

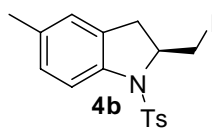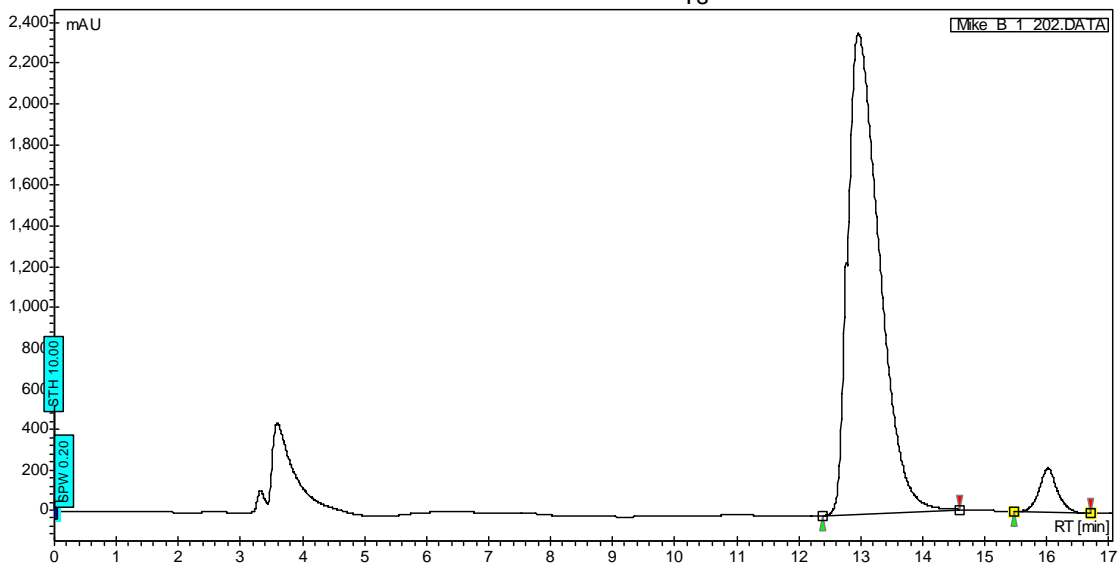

| Time (min) | Area (%) |
|------------|----------|
| 12.96      | 94.916   |
| 16.02      | 5.084    |

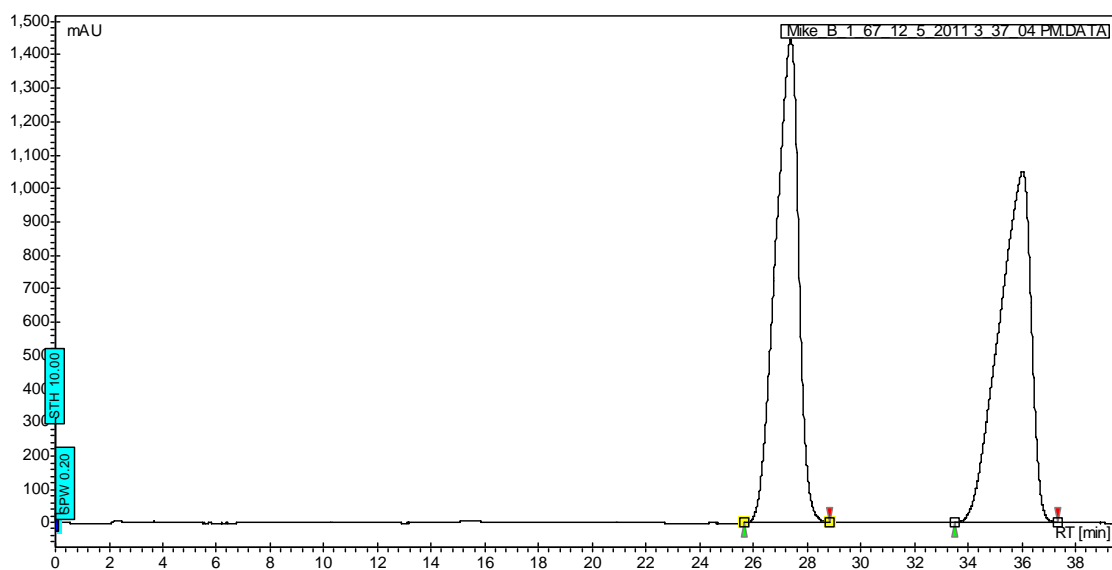

| Time (min) | Area (%) |
|------------|----------|
| 27.38      | 49.770   |
| 36.02      | 50.23    |

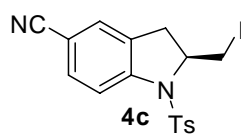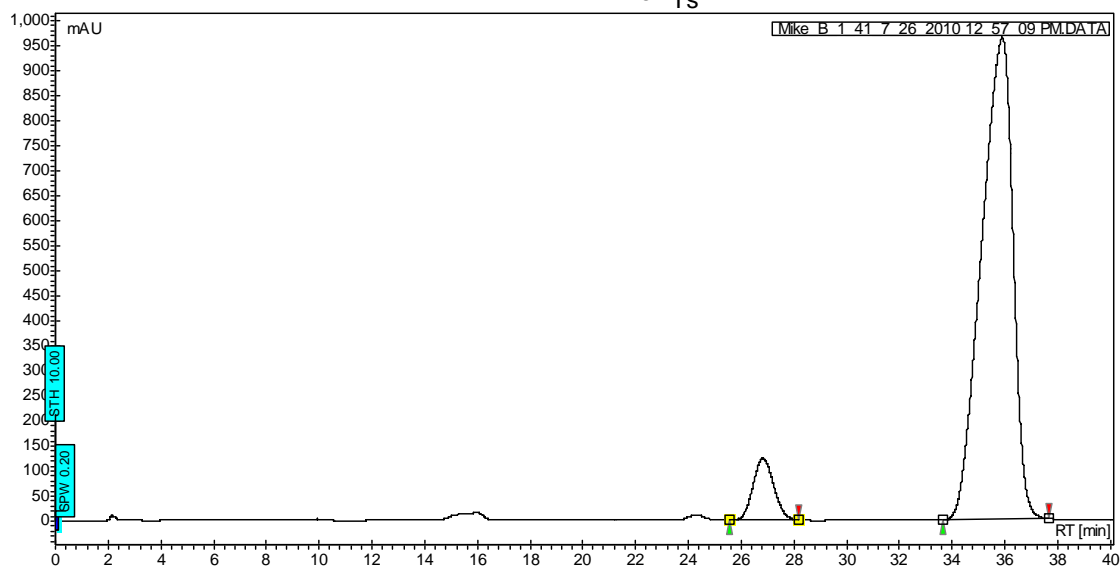

| Time (min) | Area (%) |
|------------|----------|
| 26.83      | 7.815    |
| 35.9       | 92.185   |



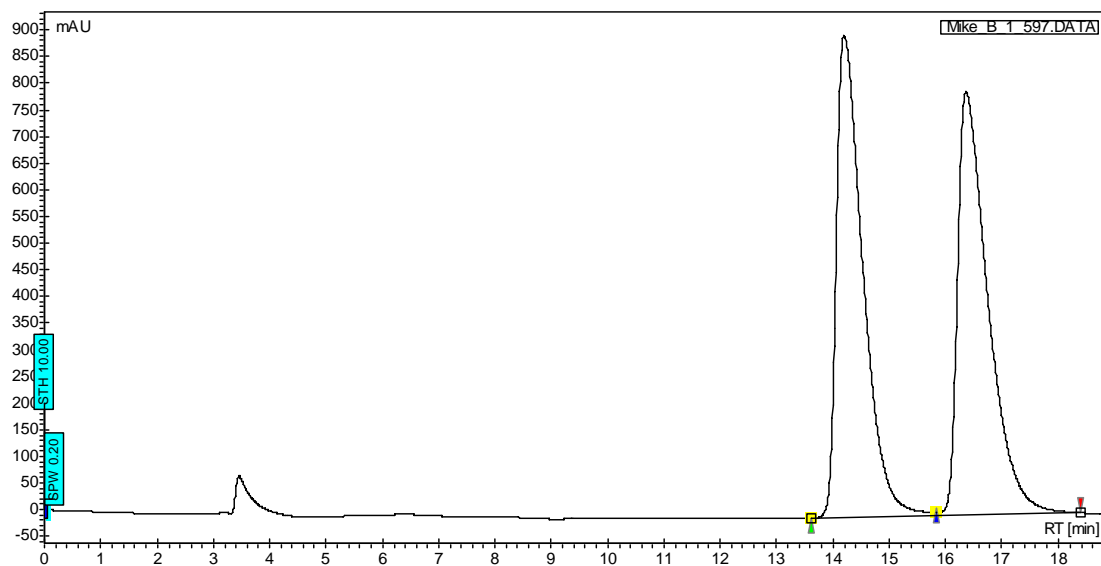

| Time (min) | Area (%) |
|------------|----------|
| 14.2       | 49.938   |
| 16.37      | 50.062   |

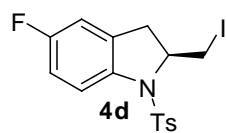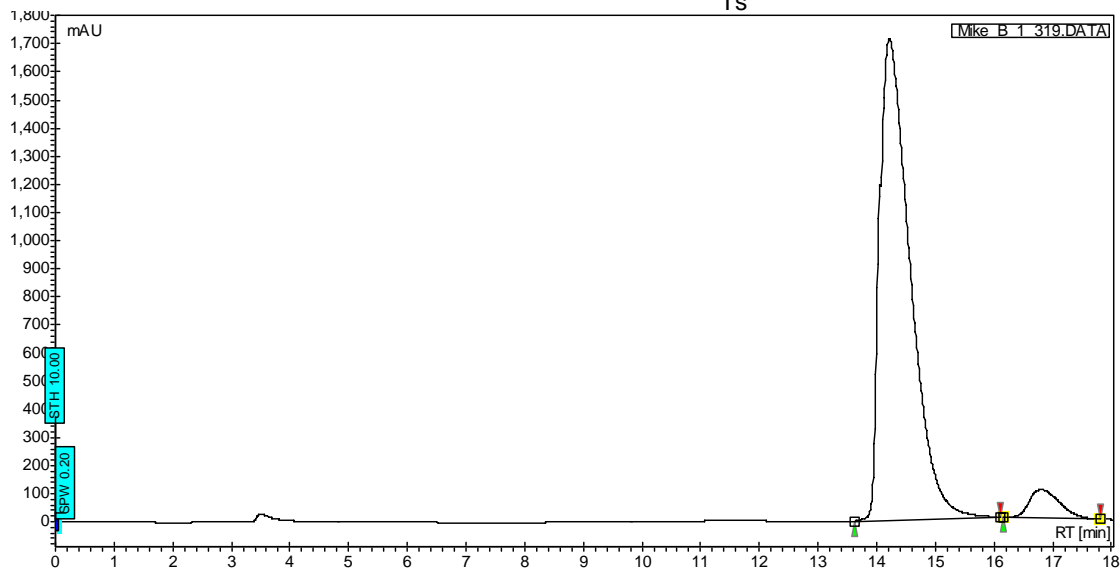

| Time (min) | Area (%) |
|------------|----------|
| 14.21      | 94.45    |
| 16.8       | 5.55     |

0.25 g scale with the (4*R*,5*S*)-di-Ph-box ligand:

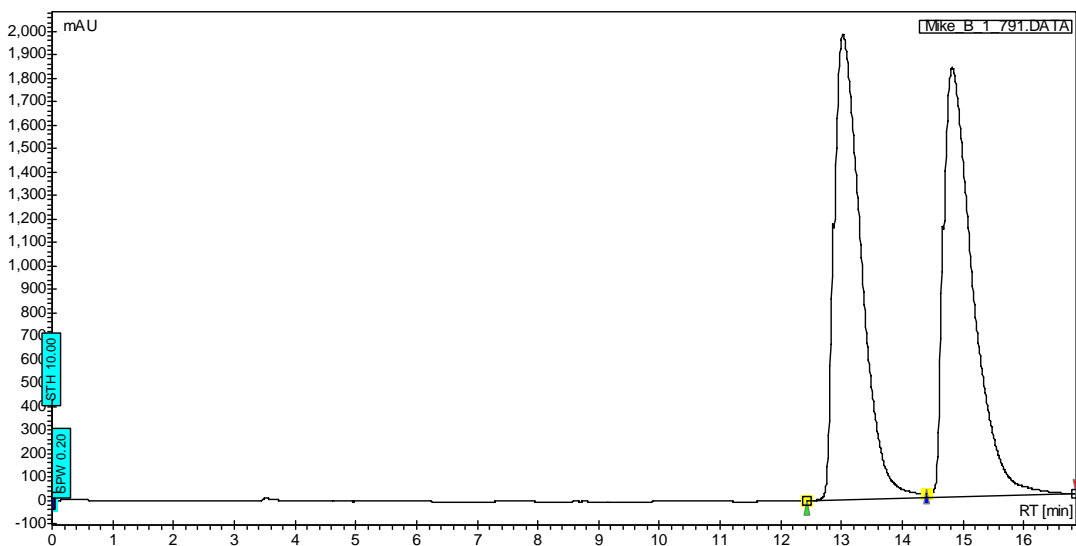

| Time (min) | Area (%) |
|------------|----------|
| 13.02      | 49.965   |
| 14.82      | 50.035   |

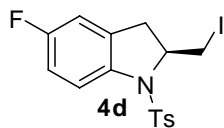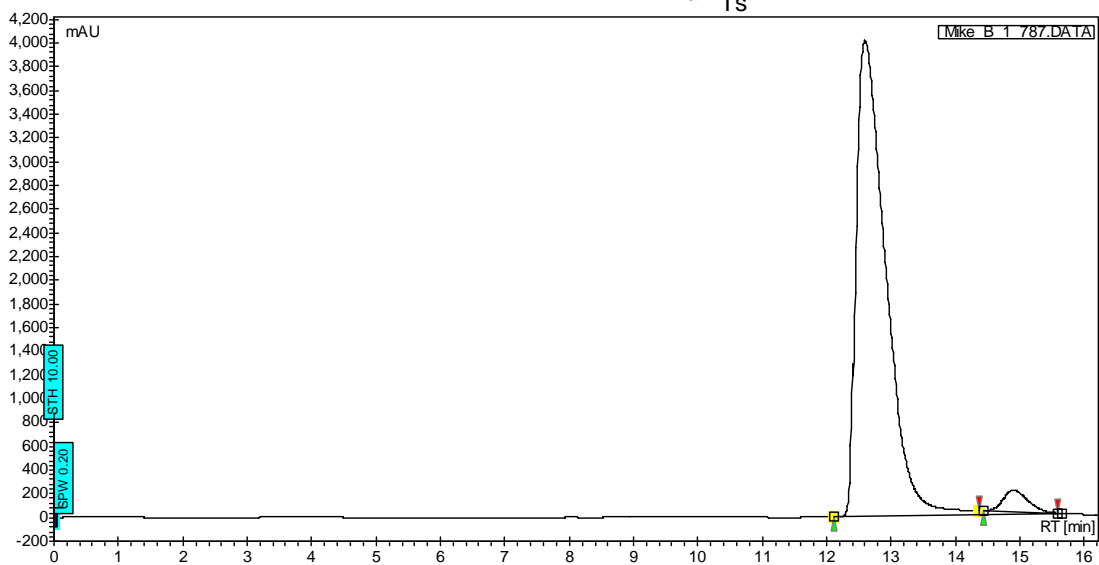

| Time (min) | Area (%) |
|------------|----------|
| 12.59      | 96.297   |
| 14.9       | 3.703    |

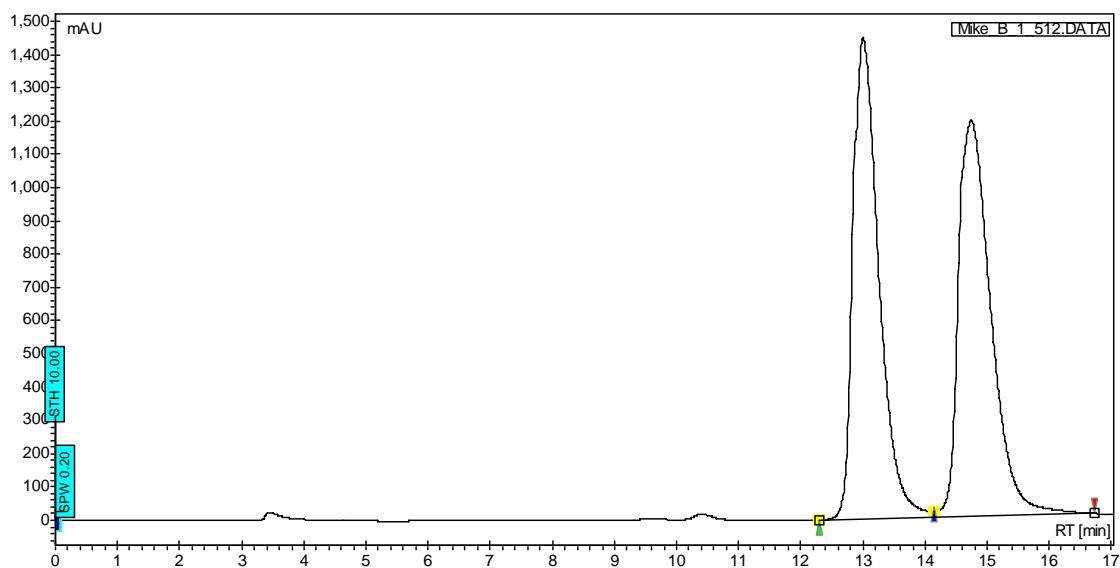

| Time (min) | Area (%) |
|------------|----------|
| 13.01      | 49.315   |
| 14.75      | 50.685   |

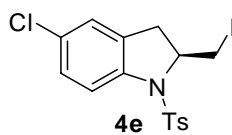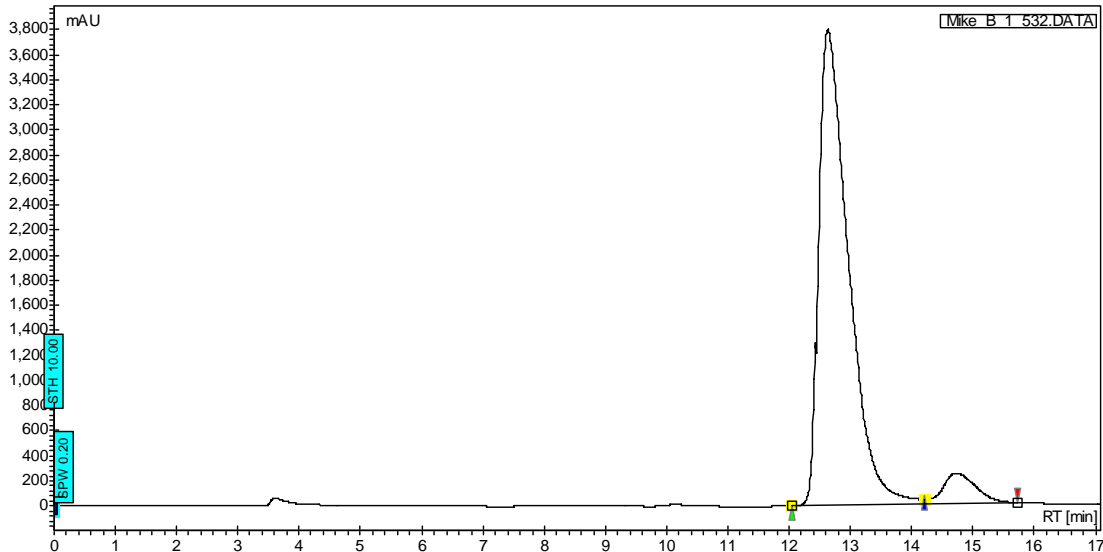

| Time (min) | Area (%) |
|------------|----------|
| 12.63      | 93.368   |
| 14.73      | 6.632    |

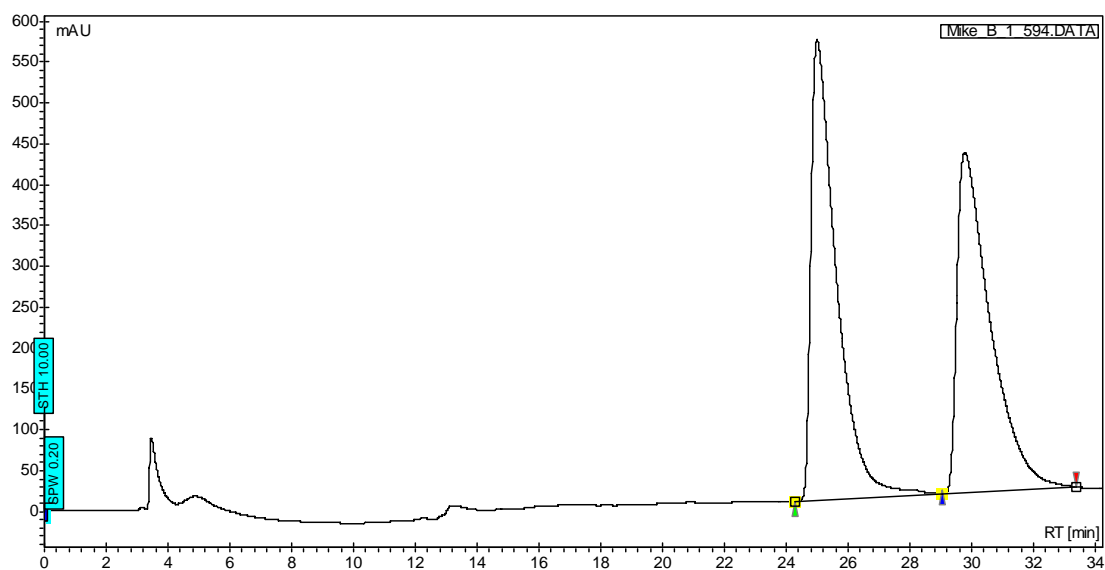

| Time (min) | Area (%) |
|------------|----------|
| 25.01      | 50.898   |
| 29.79      | 49.102   |

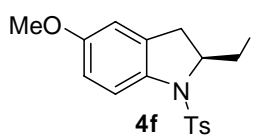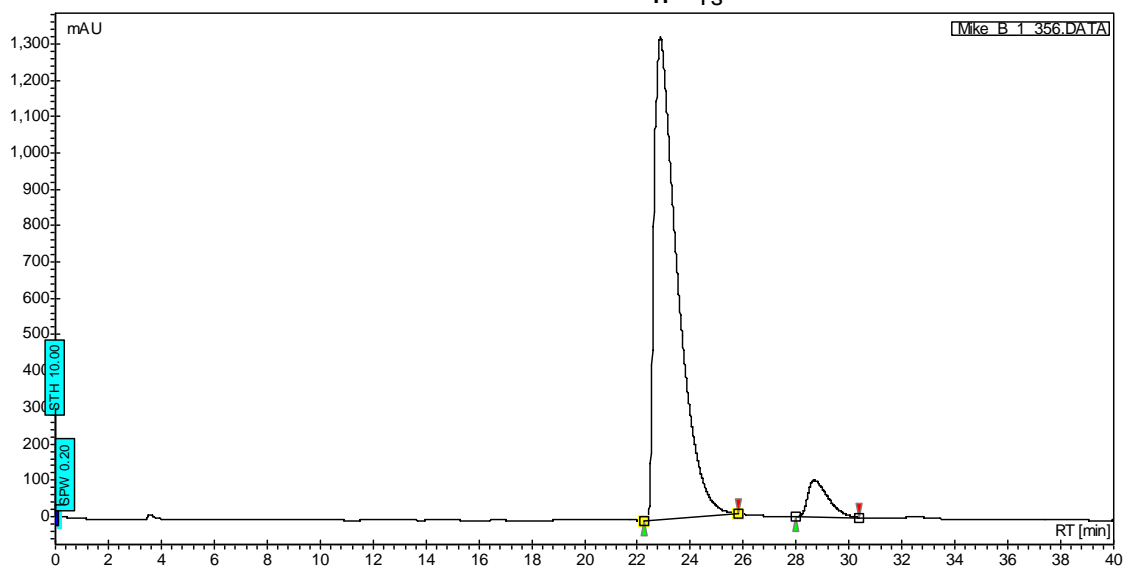

| Time (min) | Area (%) |
|------------|----------|
| 22.87      | 93.715   |
| 28.69      | 6.285    |

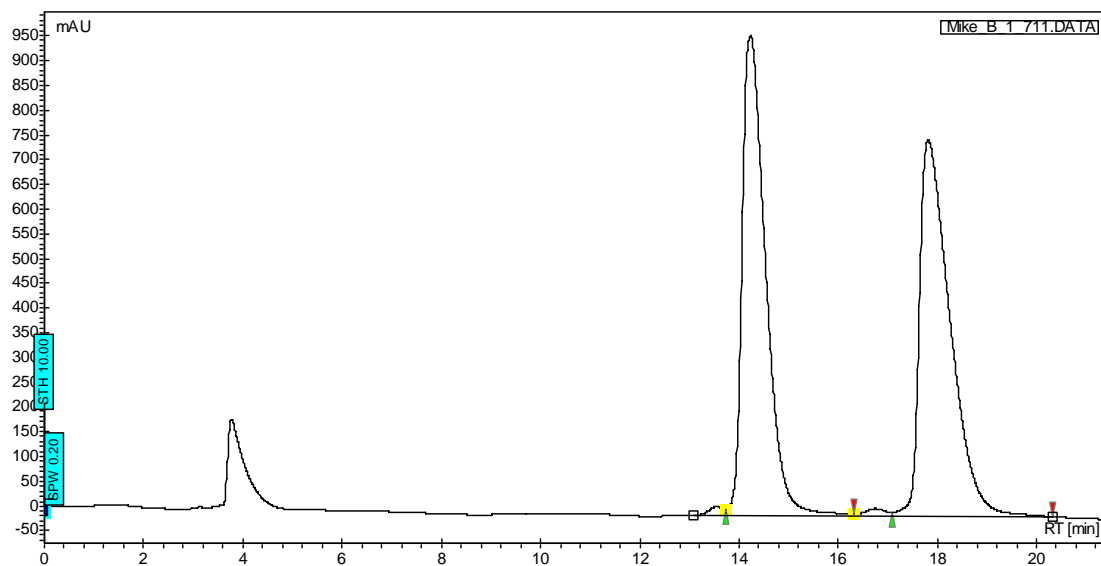

| Time (min) | Area (%) |
|------------|----------|
| 14.23      | 49.587   |
| 17.81      | 50.413   |

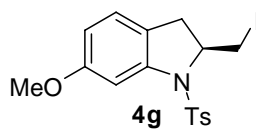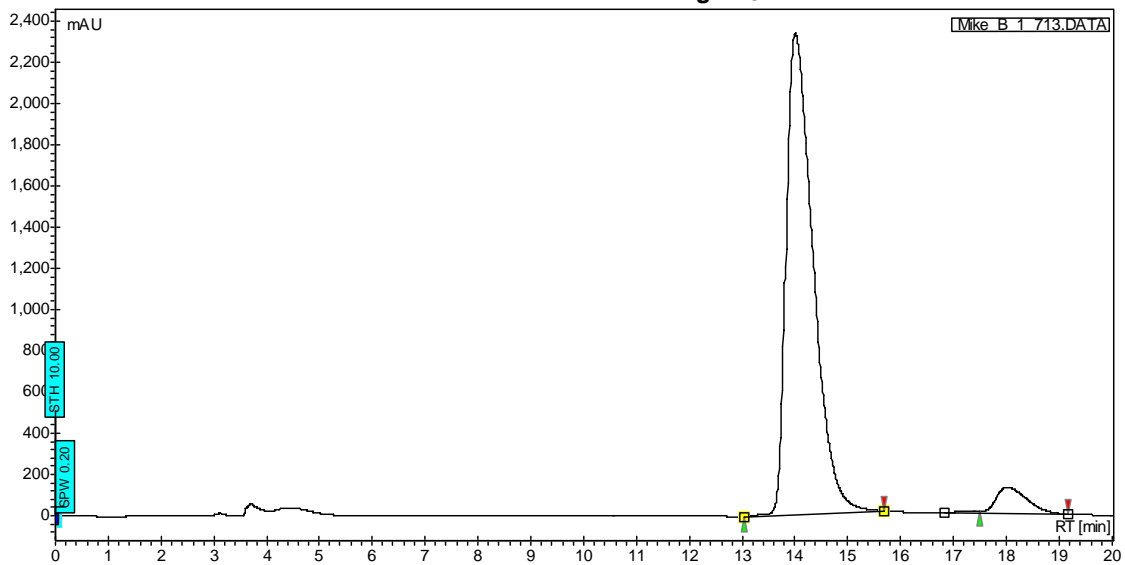

| Time (min) | Area (%) |
|------------|----------|
| 14.01      | 93.969   |
| 18.02      | 6.031    |

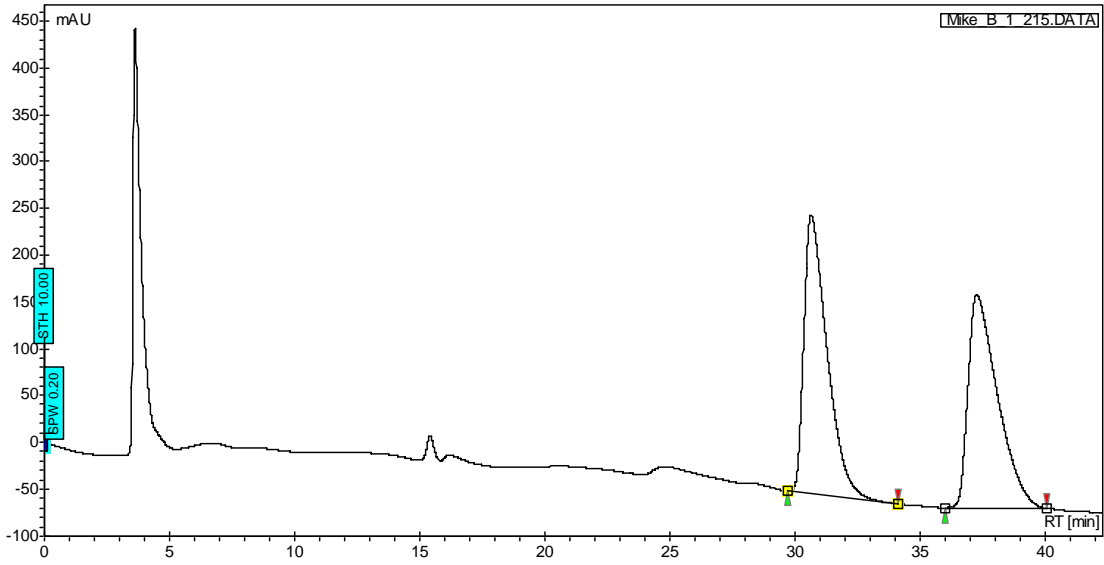

| Time (min) | Area (%) |
|------------|----------|
| 30.63      | 50.698   |
| 37.25      | 49.302   |

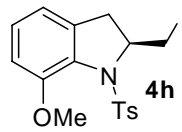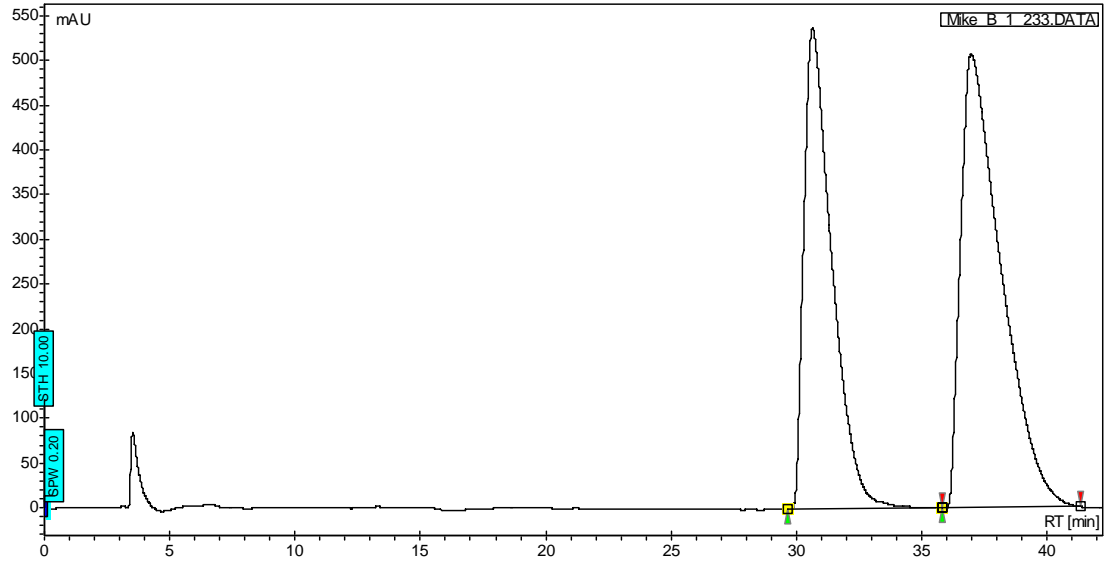

| Time (min) | Area (%) |
|------------|----------|
| 30.64      | 42.414   |
| 36.97      | 57.586   |

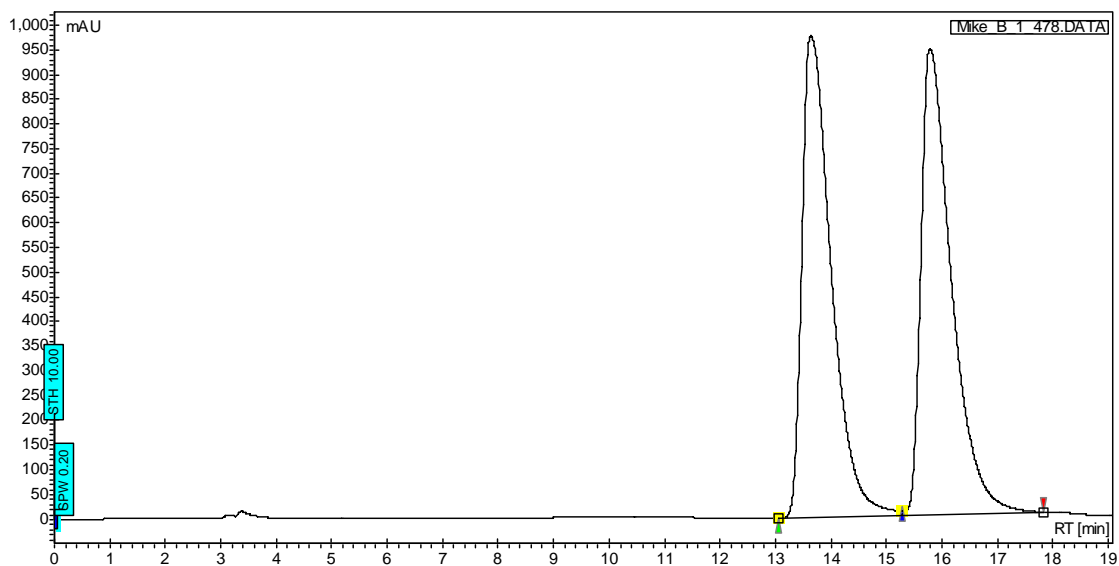

| Time (min) | Area (%) |
|------------|----------|
| 13.65      | 49.656   |
| 15.79      | 50.344   |

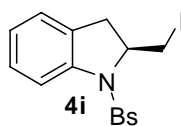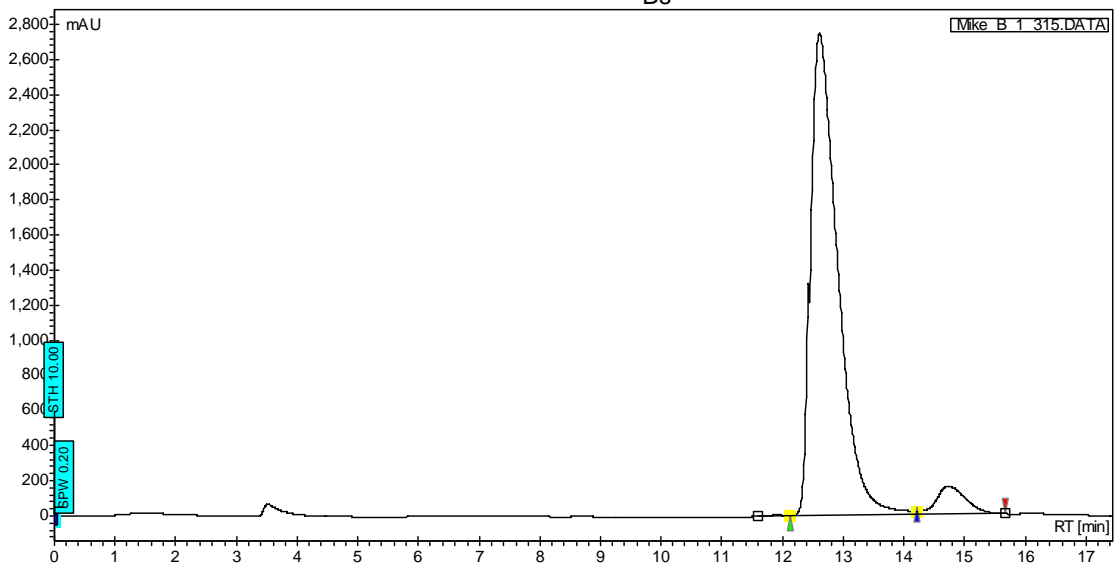

| Time (min) | Area (%) |
|------------|----------|
| 12.61      | 93.947   |
| 14.74      | 6.053    |

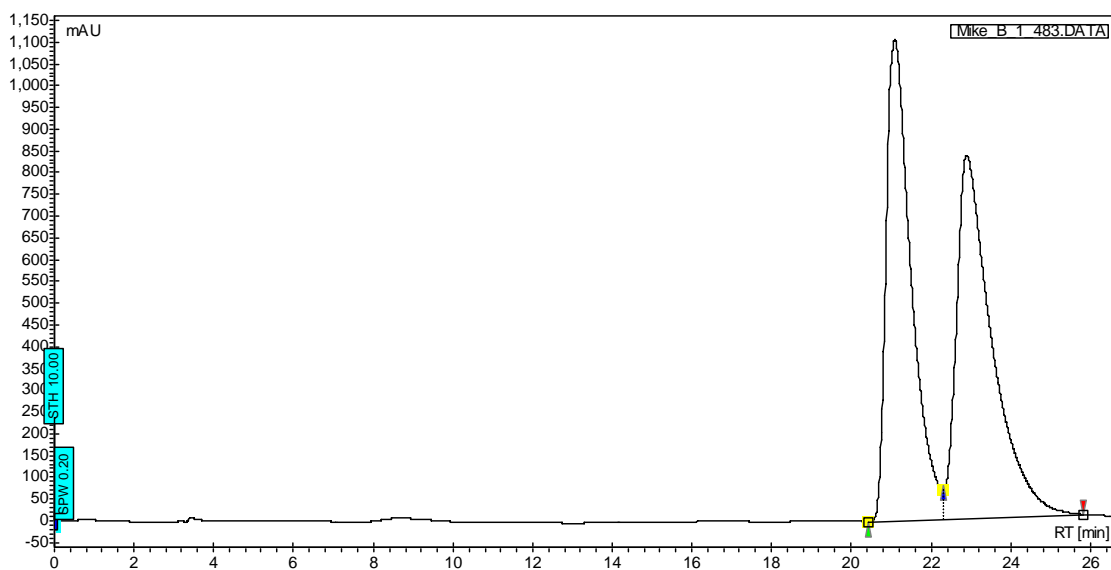

| Time (min) | Area (%) |
|------------|----------|
| 21.09      | 48.43    |
| 22.89      | 51.57    |

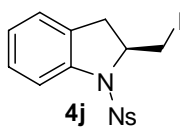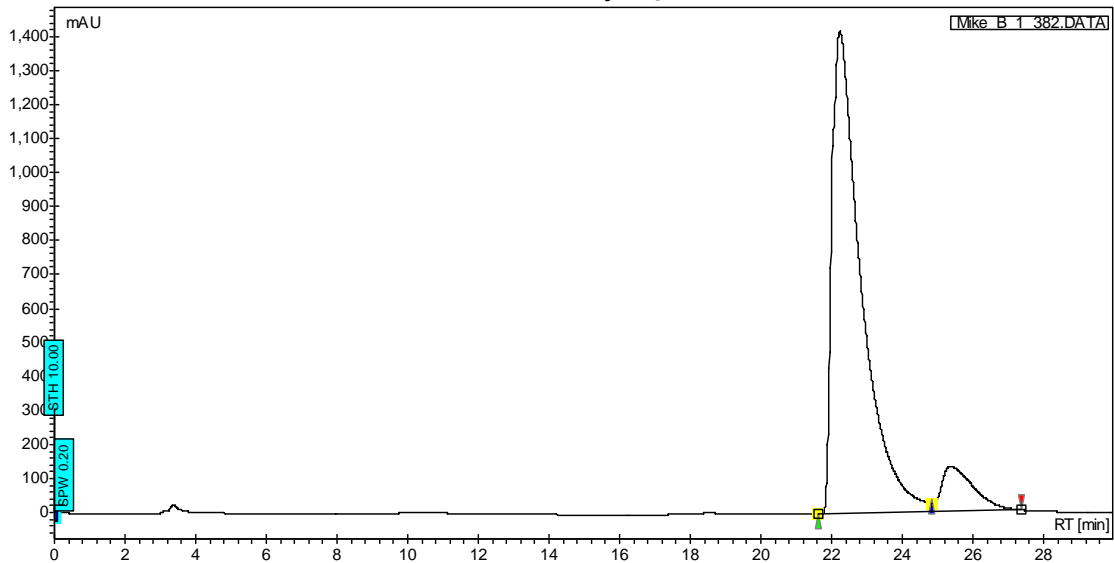

| Time (min) | Area (%) |
|------------|----------|
| 22.24      | 90.705   |
| 25.38      | 9.295    |



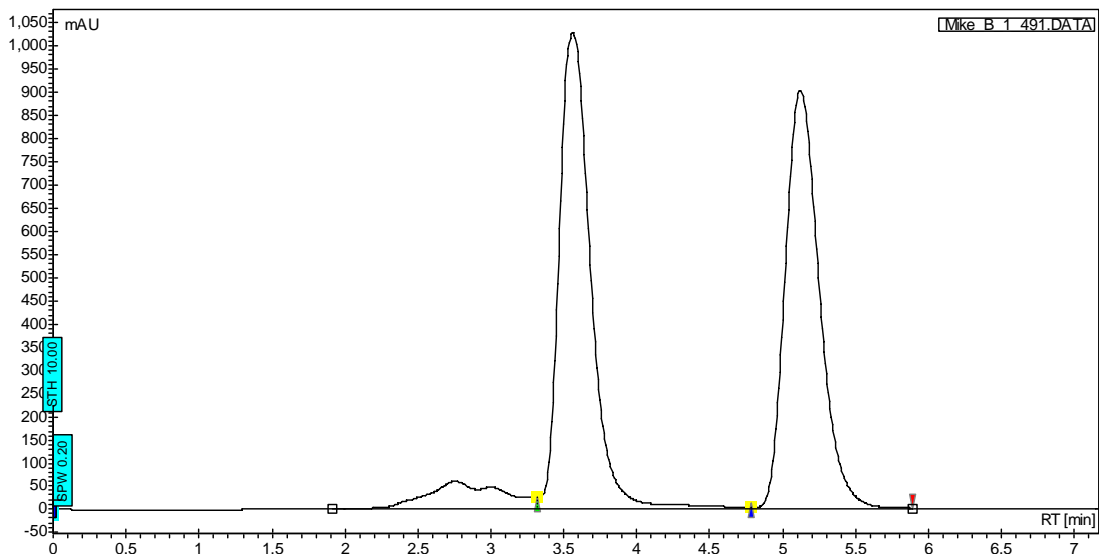

| Time (min) | Area (%) |
|------------|----------|
| 3.56       | 50.796   |
| 5.12       | 49.204   |

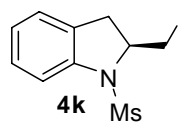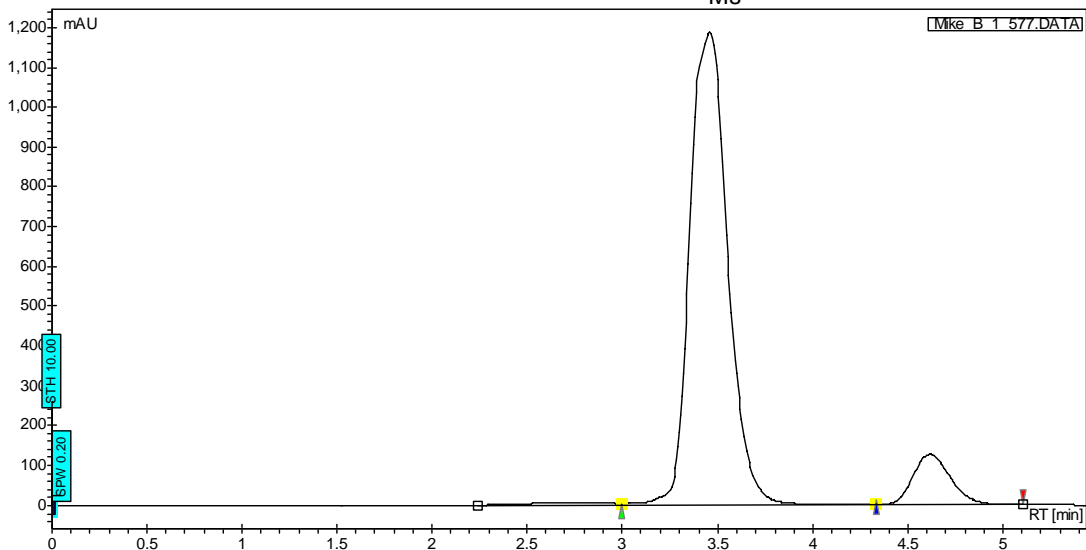

| Time (min) | Area (%) |
|------------|----------|
| 3.46       | 90.35    |
| 4.62       | 9.65     |

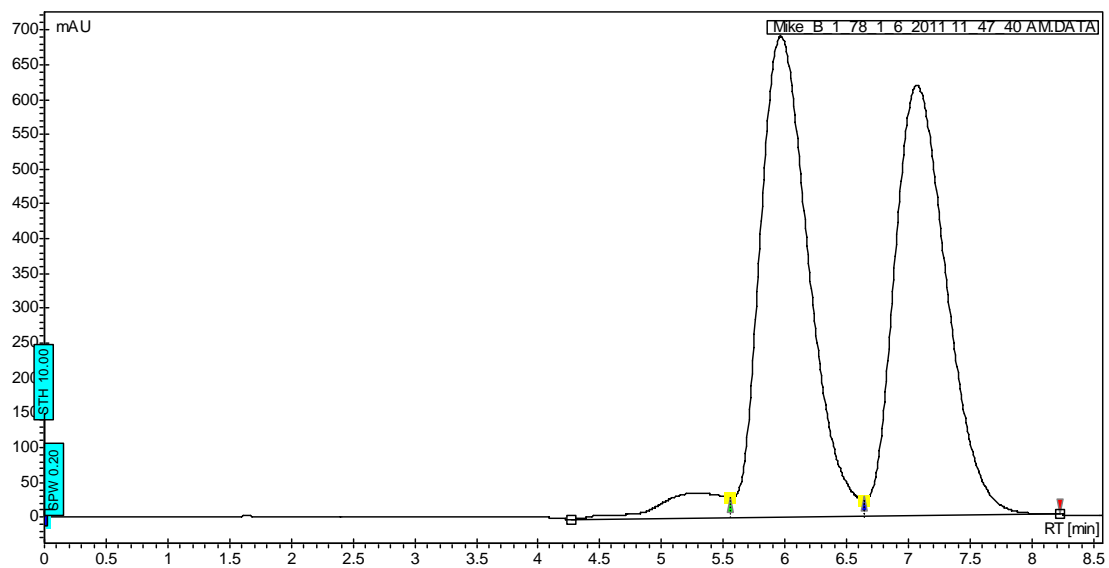

| Time (min) | Area (%) |
|------------|----------|
| 5.97       | 50.965   |
| 7.07       | 49.035   |

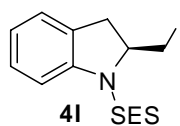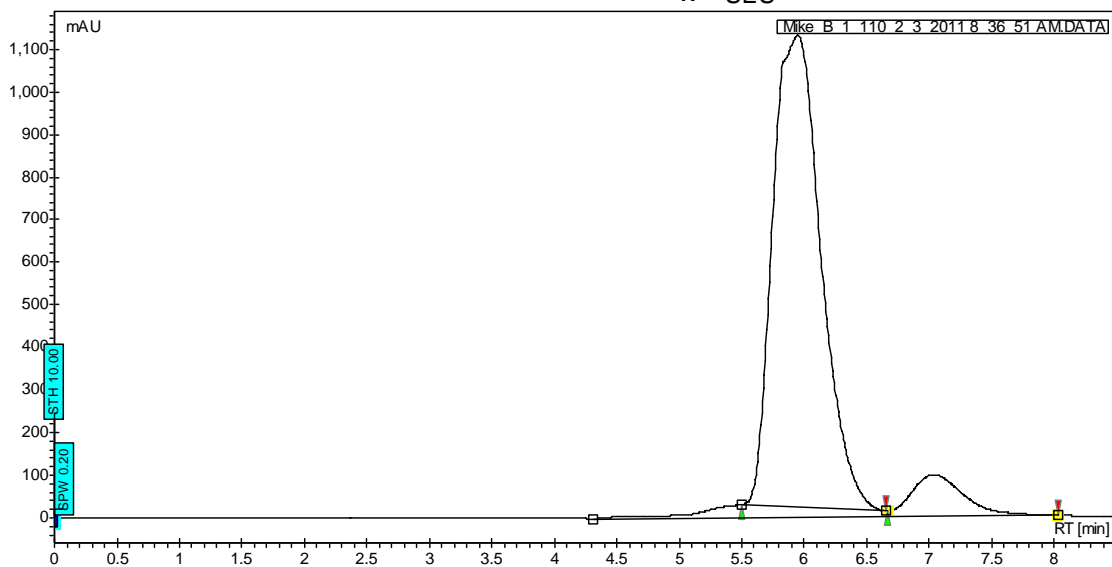

| Time (min) | Area (%) |
|------------|----------|
| 5.95       | 91.146   |
| 7.03       | 8.854    |

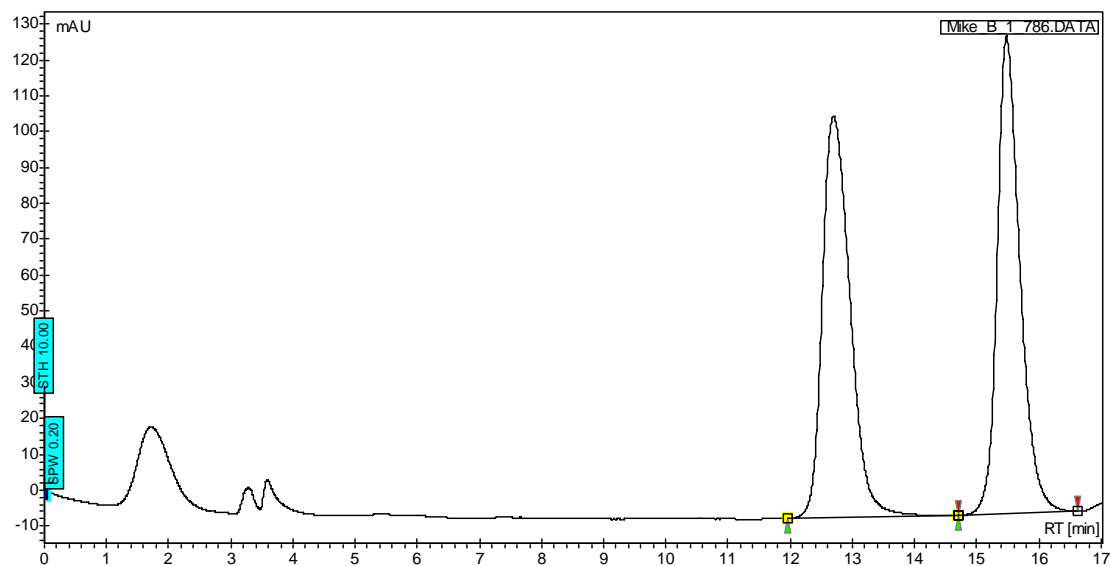

| Time (min) | Area (%) |
|------------|----------|
| 12.69      | 50.584   |
| 15.48      | 49.416   |

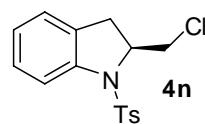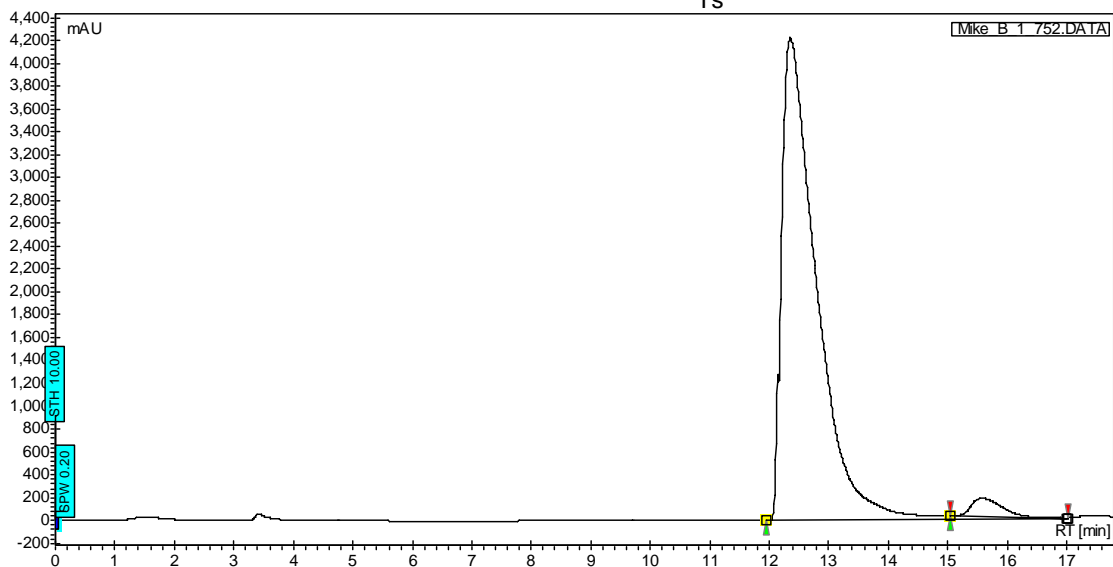

| Time (min) | Area (%) |
|------------|----------|
| 12.35      | 96.792   |
| 15.58      | 3.208    |

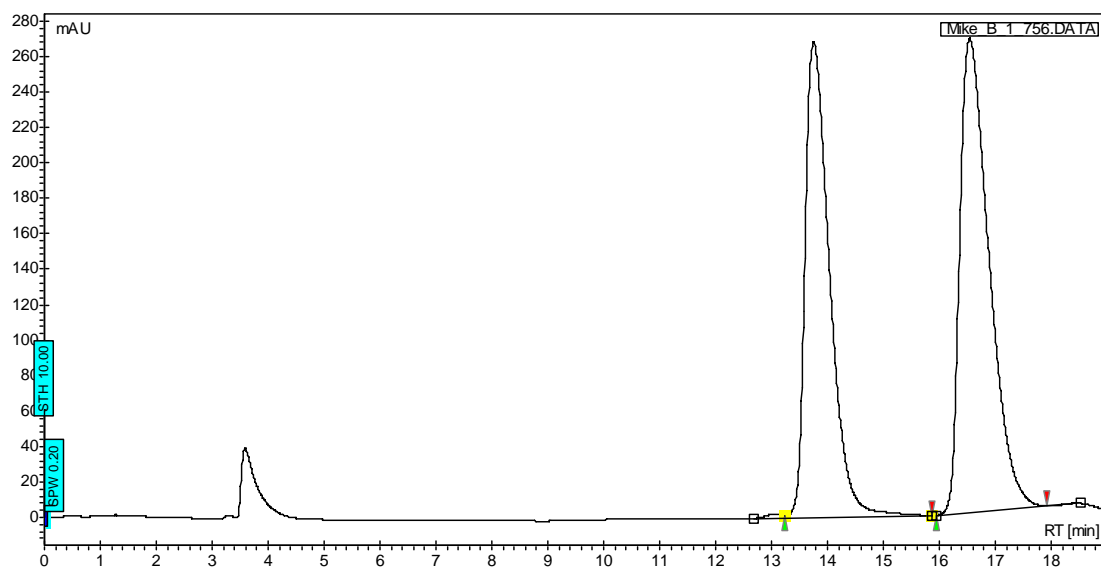

| Time (min) | Area (%) |
|------------|----------|
| 13.76      | 45.531   |
| 16.55      | 54.469   |

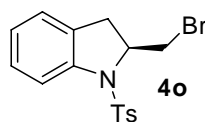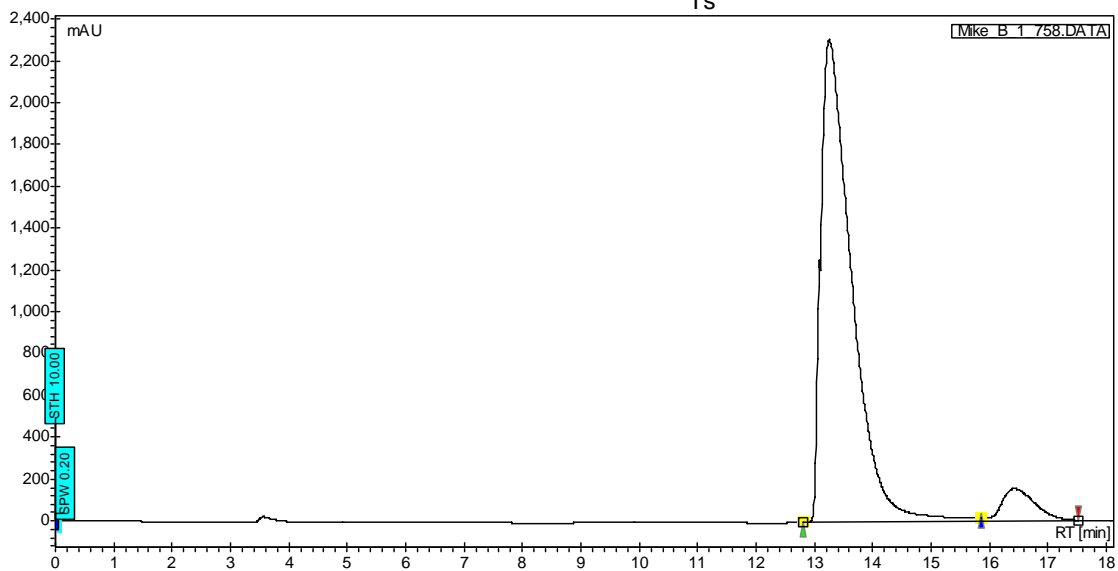

| Time (min) | Area (%) |
|------------|----------|
| 13.25      | 93.345   |
| 16.43      | 6.655    |

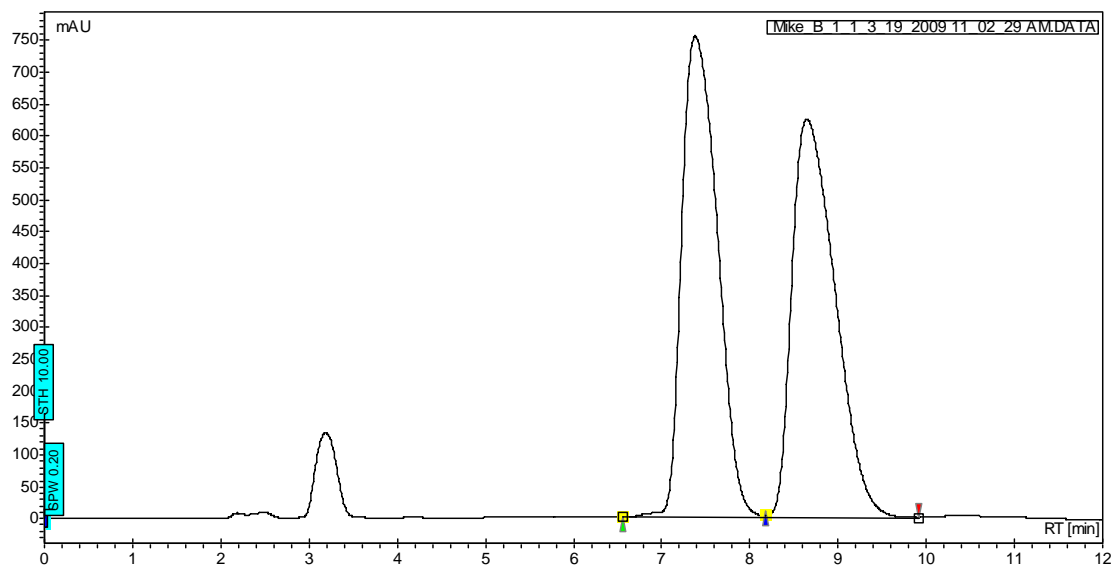

| Time (min) | Area (%) |
|------------|----------|
| 7.38       | 50.015   |
| 8.65       | 49.985   |

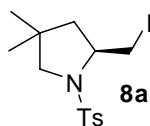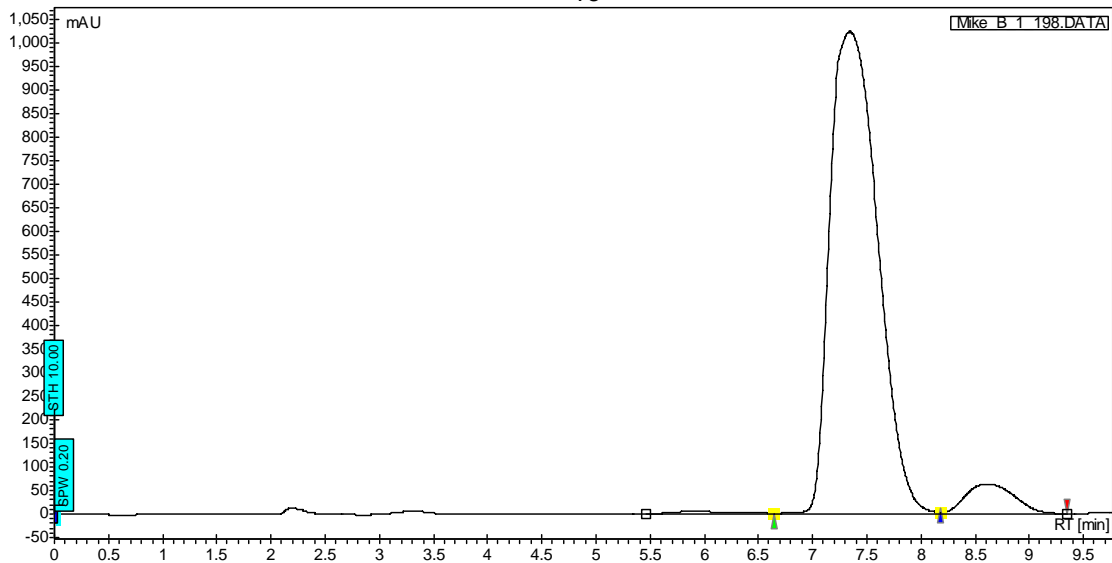

| Time (min) | Area (%) |
|------------|----------|
| 7.34       | 94.099   |
| 8.61       | 5.901    |

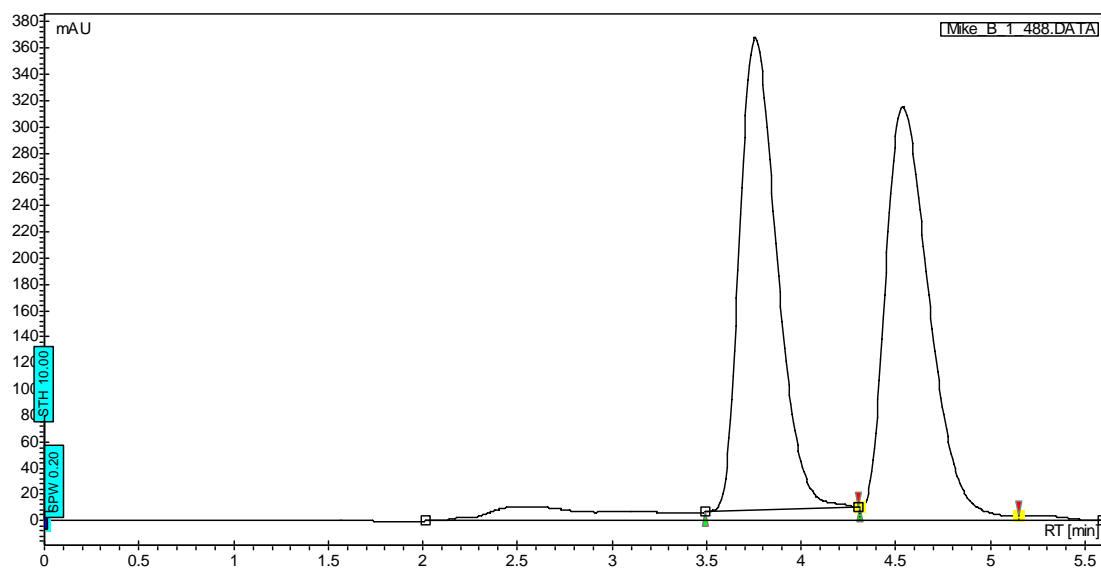

| Time (min) | Area (%) |
|------------|----------|
| 3.76       | 49.108   |
| 4.54       | 50.892   |

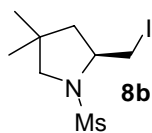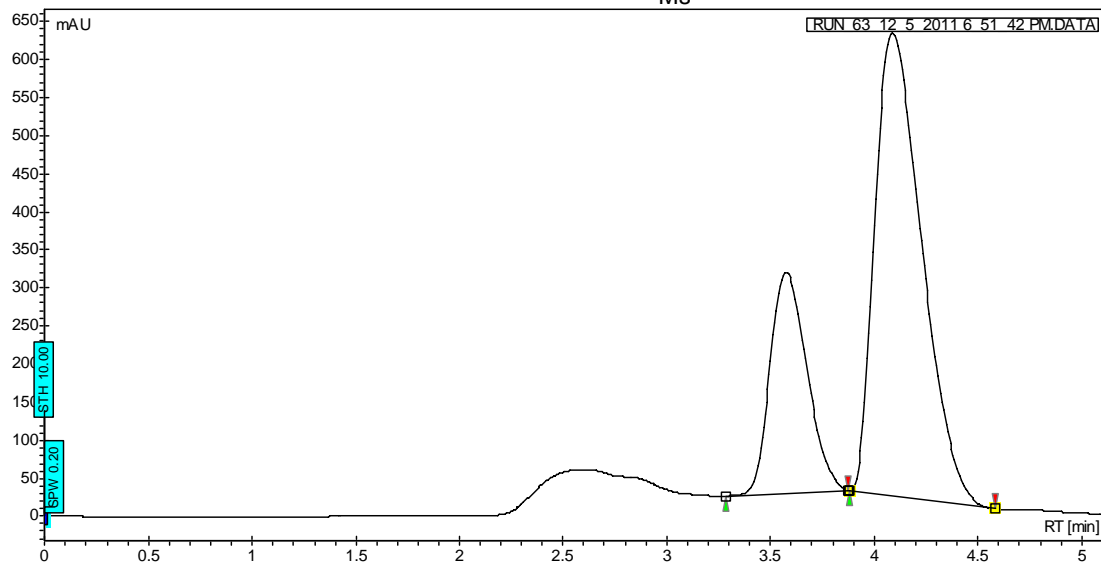

| Time (min) | Area (%) |
|------------|----------|
| 3.57       | 27.234   |
| 4.09       | 72.766   |

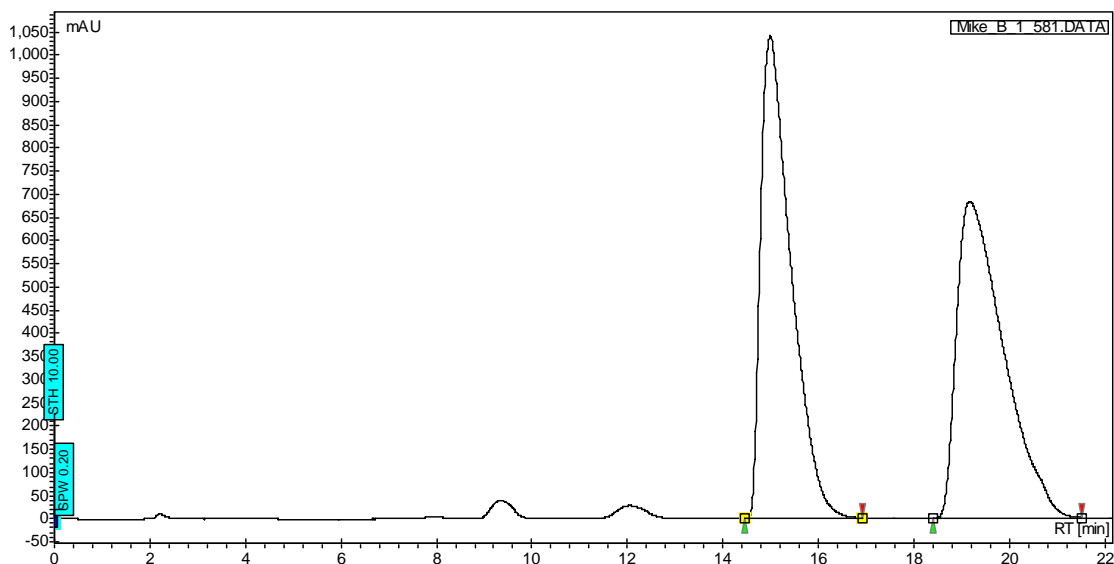

| Time (min) | Area (%) |
|------------|----------|
| 14.99      | 49.699   |
| 19.17      | 50.301   |

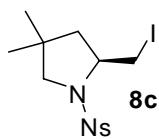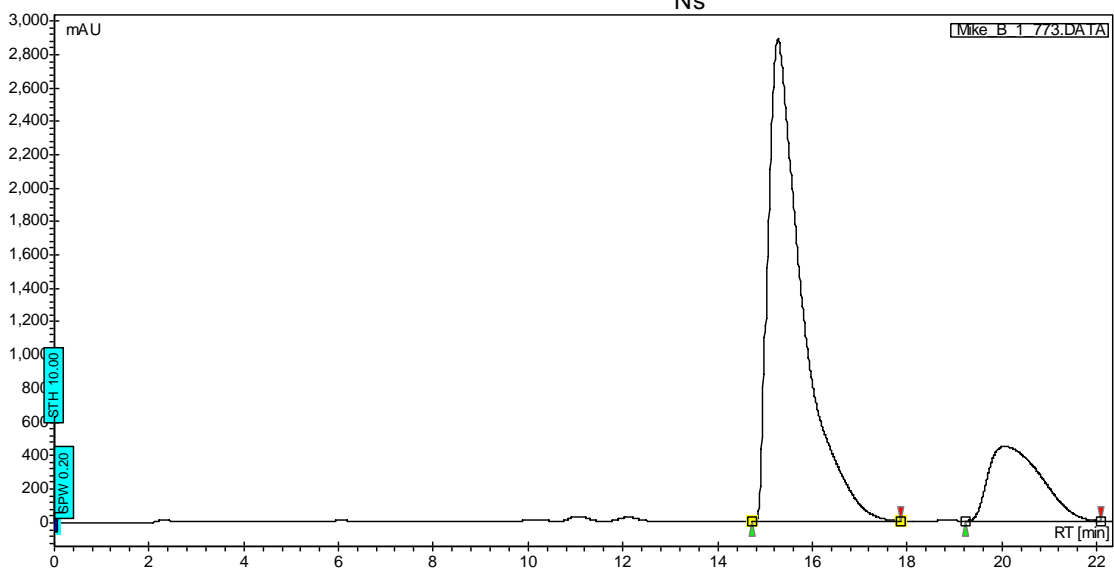

| Time (min) | Area (%) |
|------------|----------|
| 15.27      | 80.678   |
| 20.06      | 19.322   |

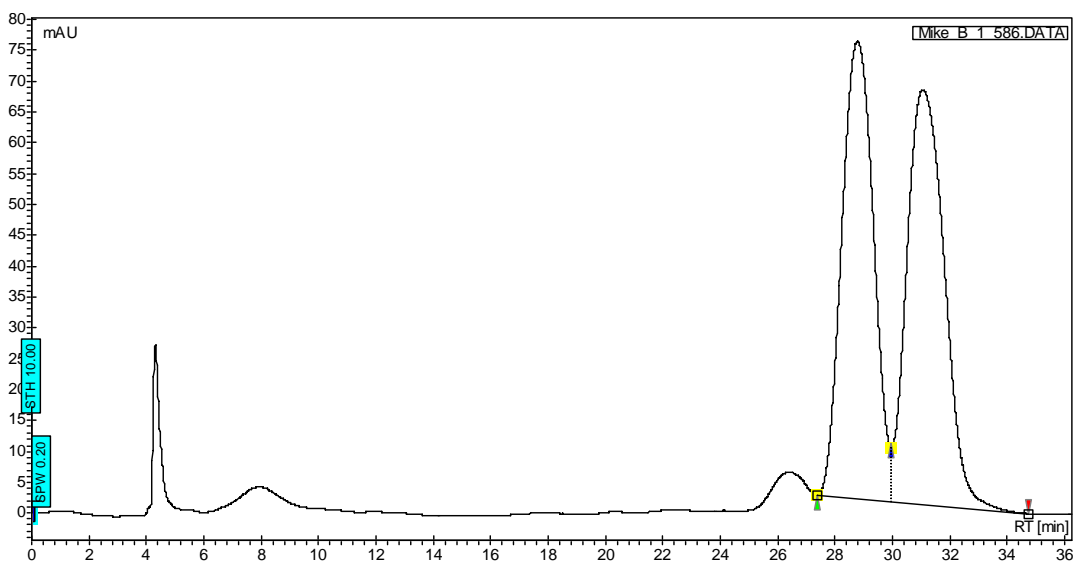

| Time (min) | Area (%) |
|------------|----------|
| 28.79      | 48.24    |
| 31.07      | 51.76    |

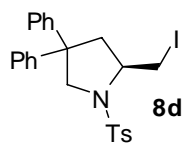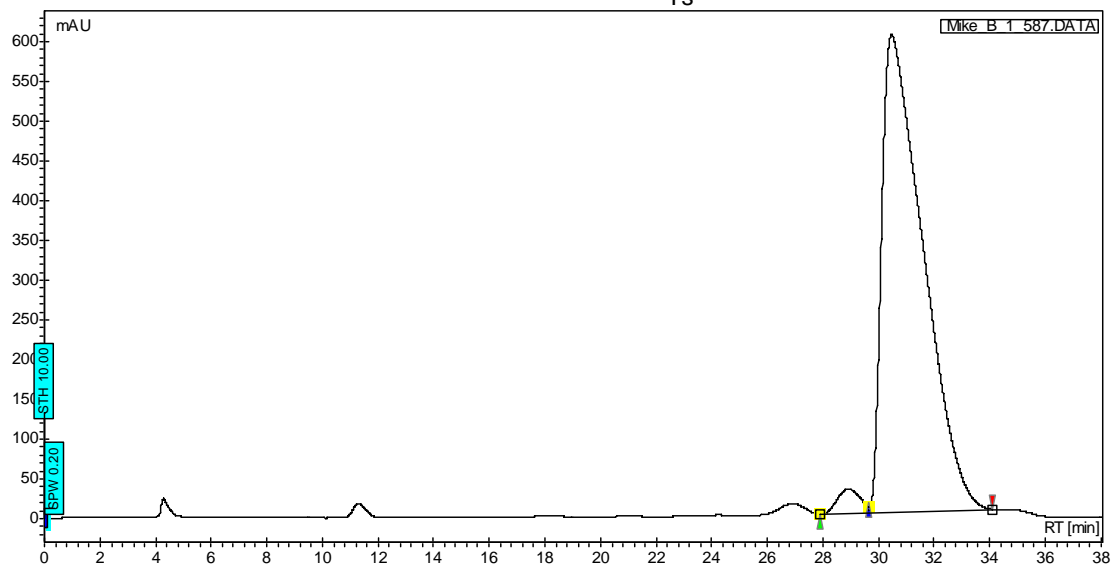

| Time (min) | Area (%) |
|------------|----------|
| 28.93      | 2.777    |
| 30.47      | 97.223   |



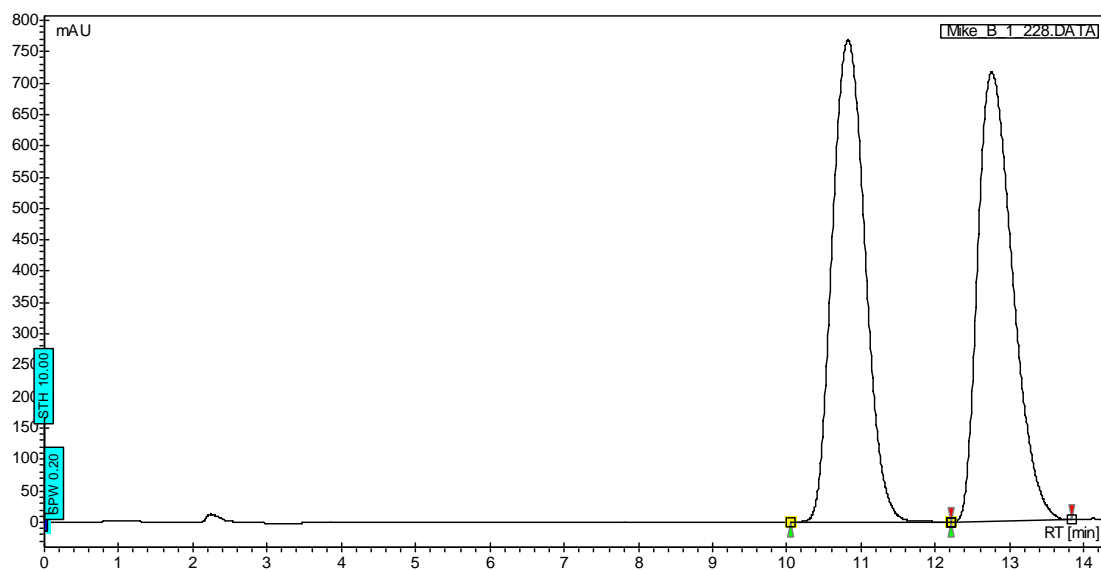

| Time (min) | Area (%) |
|------------|----------|
| 10.83      | 50.157   |
| 12.76      | 49.843   |

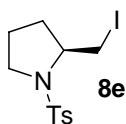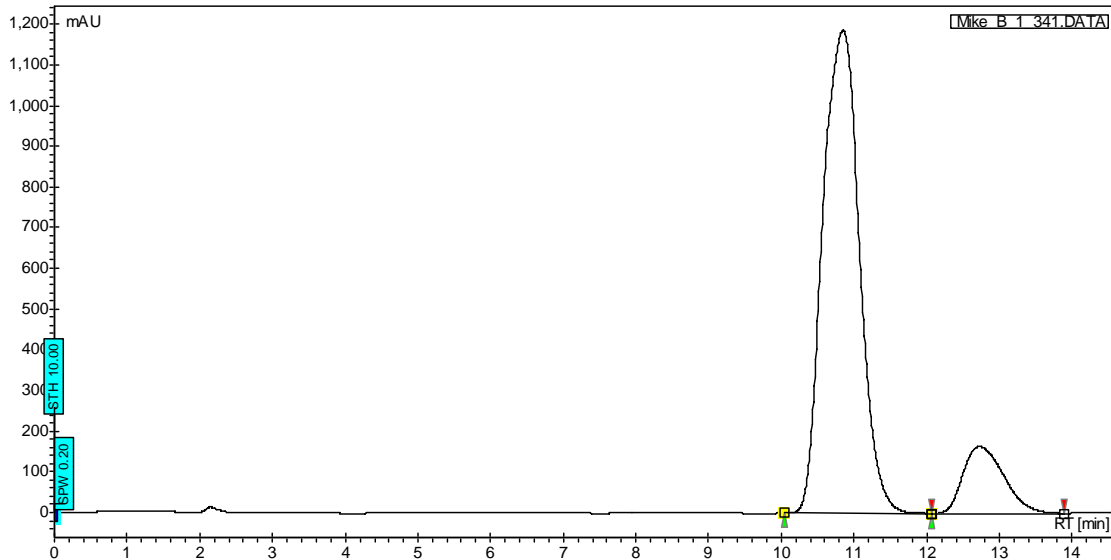

| Time (min) | Area (%) |
|------------|----------|
| 10.85      | 86.645   |
| 12.73      | 13.355   |

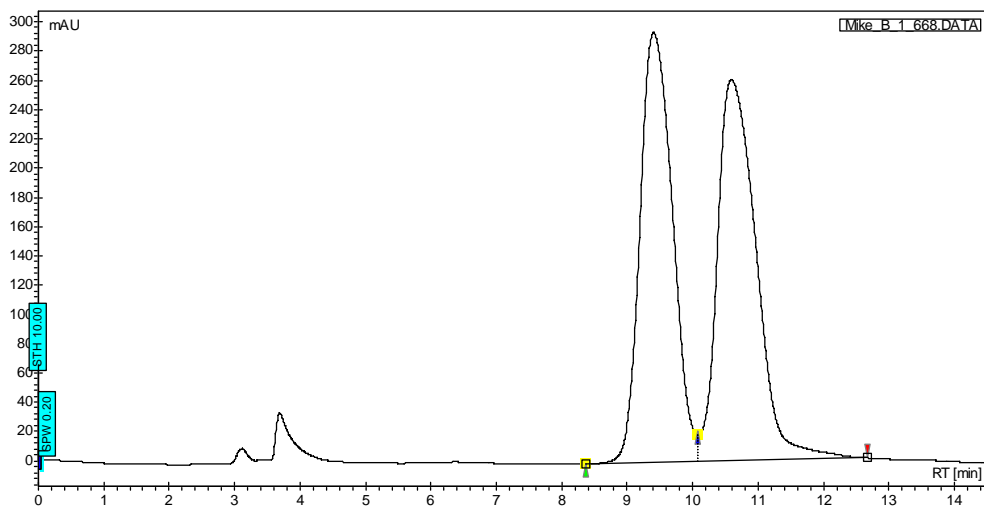

| Time (min) | Area (%) |
|------------|----------|
| 9.4        | 48.655   |
| 10.59      | 51.345   |

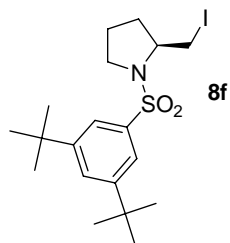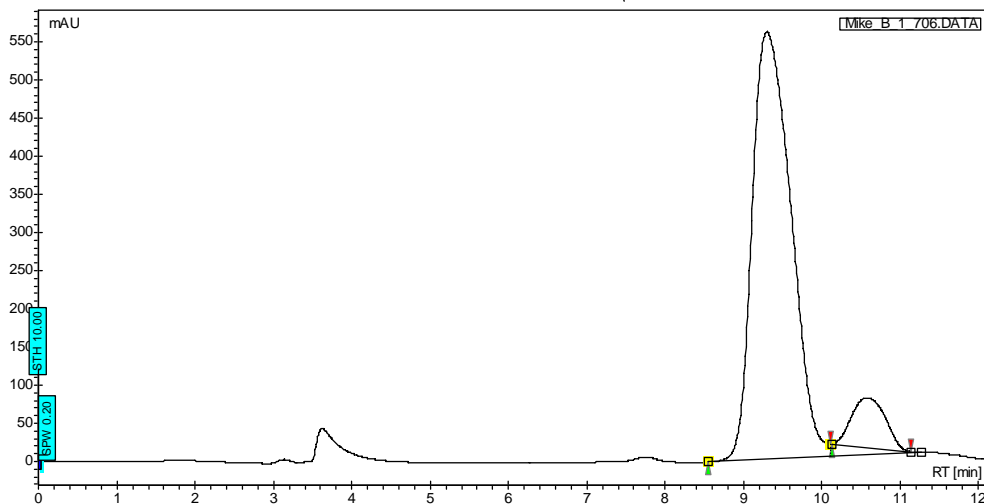

| Time (min) | Area (%) |
|------------|----------|
| 9.3        | 90.72    |
| 10.59      | 9.28     |

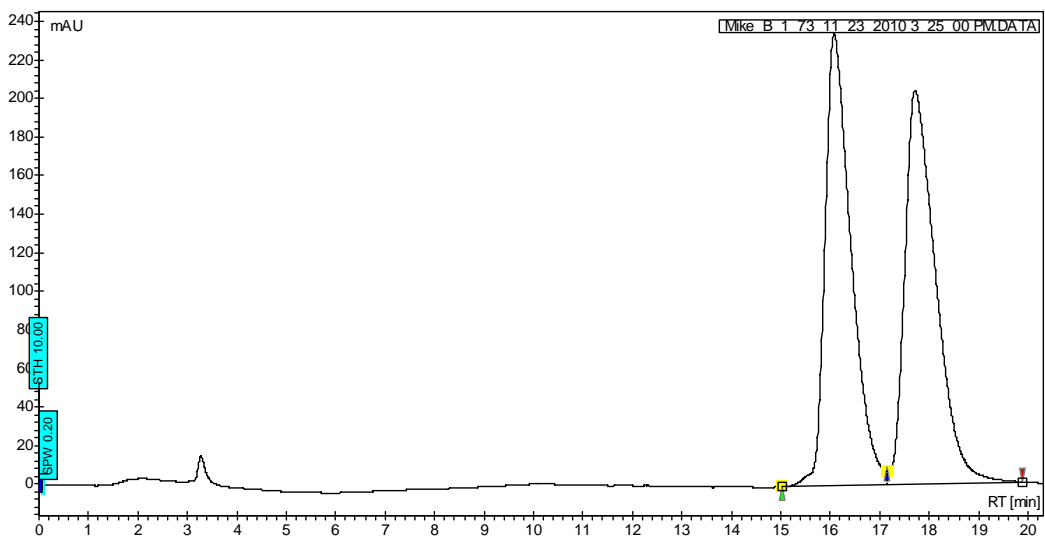

| Time (min) | Area (%) |
|------------|----------|
| 16.07      | 49.236   |
| 17.71      | 50.764   |

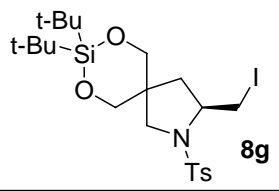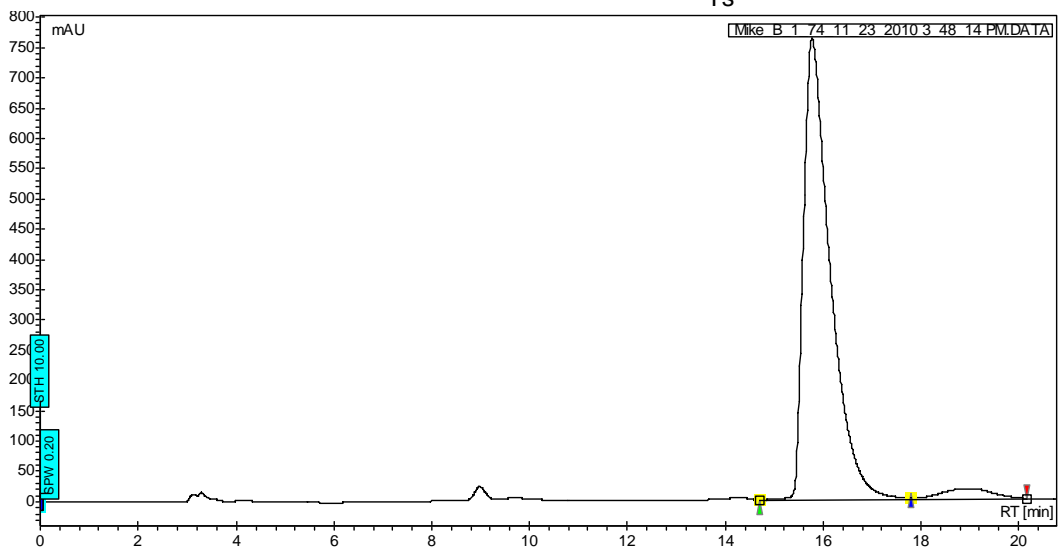

| Time (min) | Area (%) |
|------------|----------|
| 15.77      | 95.943   |
| 18.98      | 4.057    |

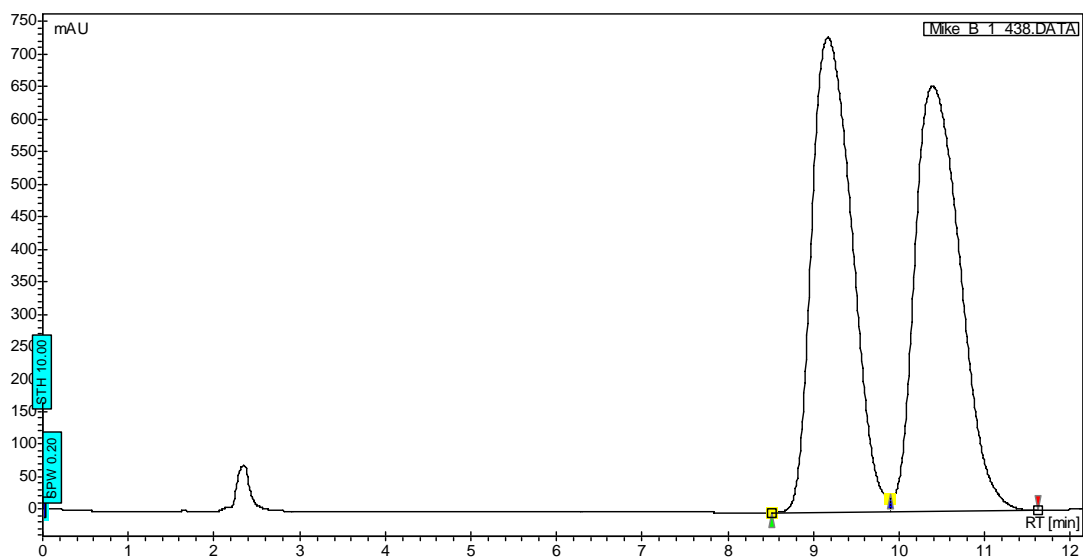

| Time (min) | Area (%) |
|------------|----------|
| 9.17       | 49.685   |
| 10.39      | 50.315   |

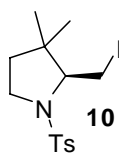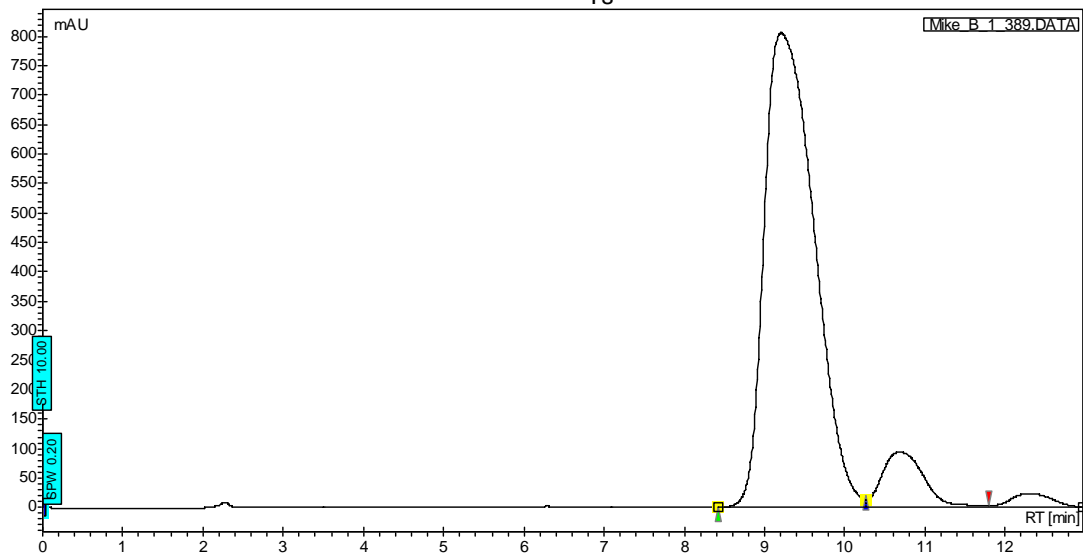

| Time (min) | Area (%) |
|------------|----------|
| 9.21       | 91.09    |
| 10.69      | 8.91     |

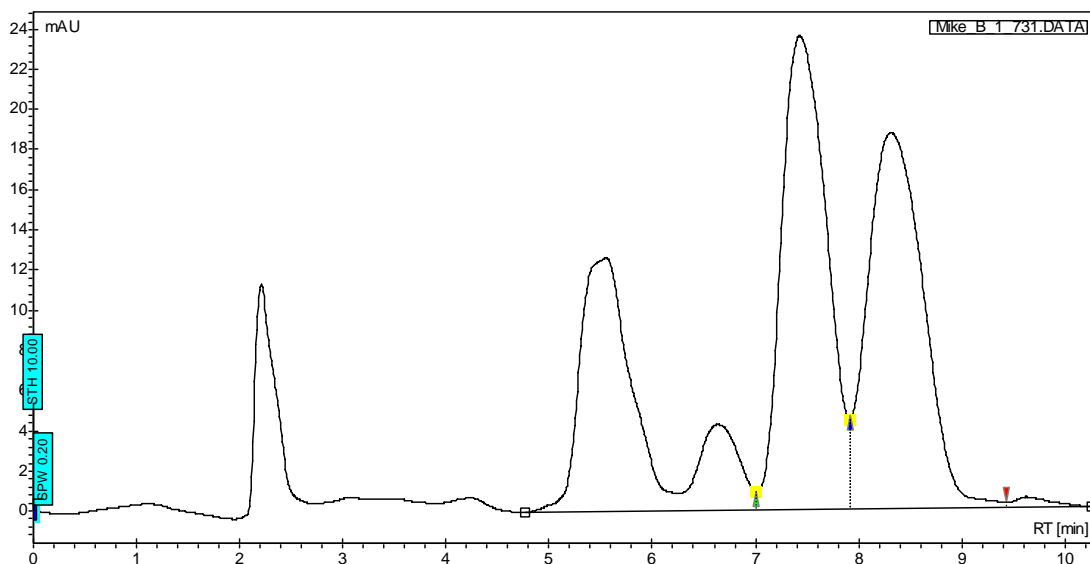

| Time (min) | Area (%) |
|------------|----------|
| 7.43       | 50.383   |
| 8.31       | 49.617   |

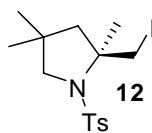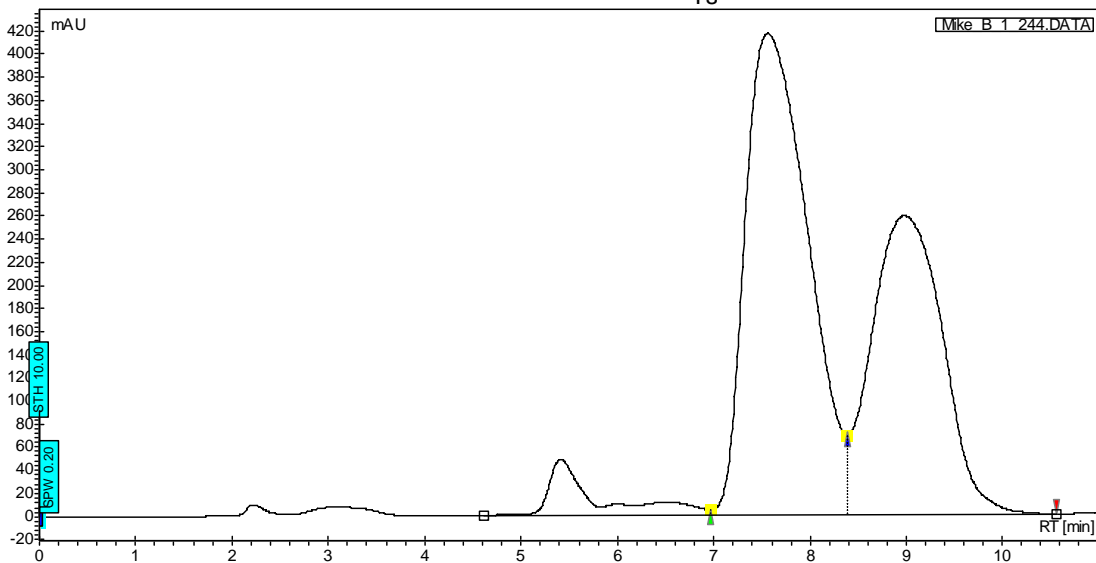

| Time (min) | Area (%) |
|------------|----------|
| 7.56       | 58.445   |
| 8.98       | 41.555   |

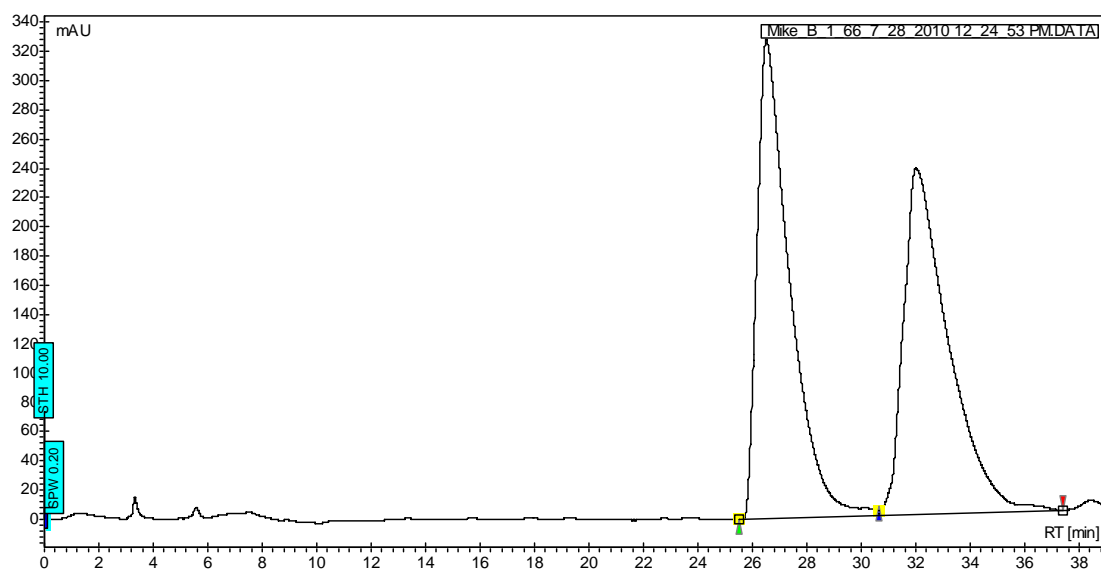

| Time (min) | Area (%) |
|------------|----------|
| 26.52      | 50.187   |
| 32.02      | 49.813   |

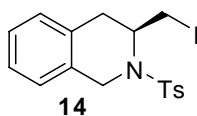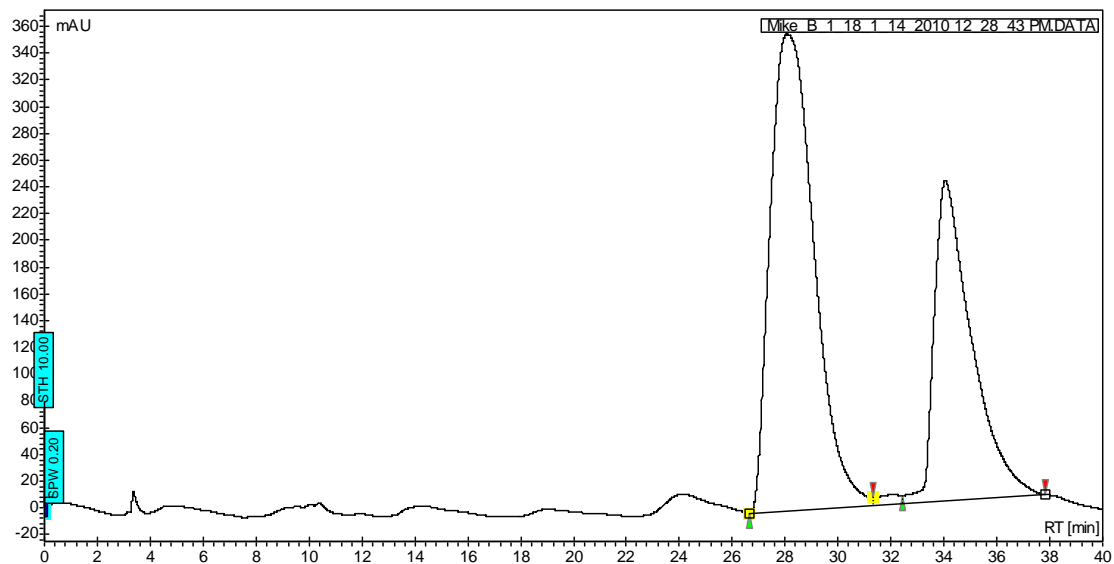

| Time (min) | Area (%) |
|------------|----------|
| 28.09      | 63.492   |
| 34.05      | 36.508   |

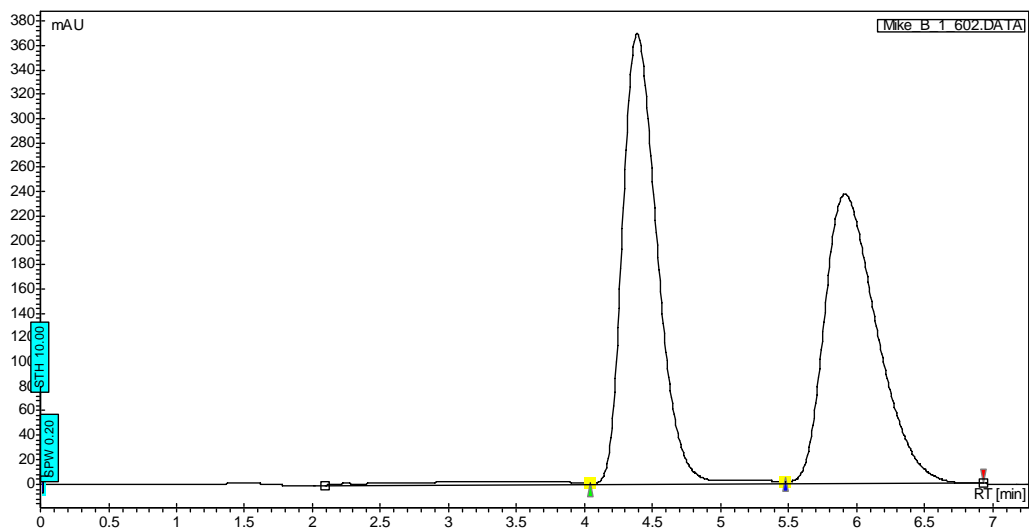

| Time (min) | Area (%) |
|------------|----------|
| 4.39       | 50.724   |
| 5.91       | 49.276   |

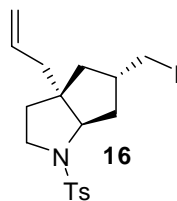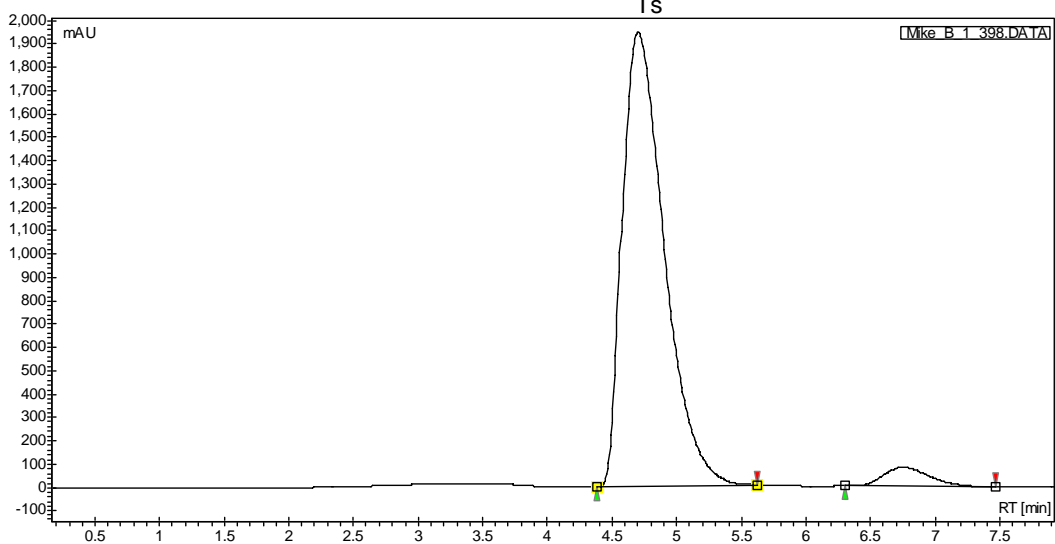

| Time (min) | Area (%) |
|------------|----------|
| 4.7        | 95.56    |
| 6.75       | 4.44     |

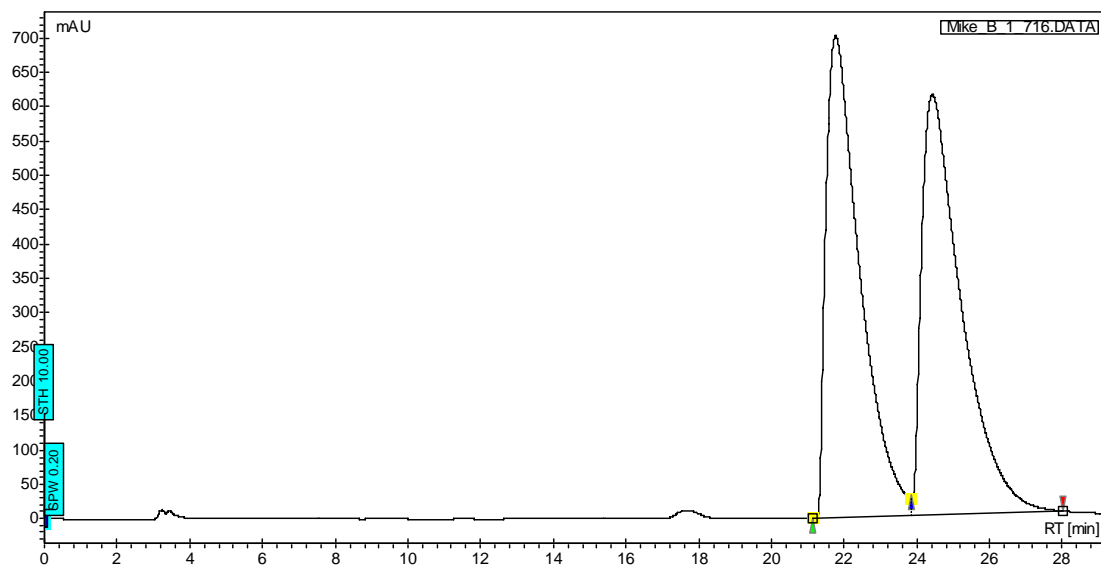

| Time (min) | Area (%) |
|------------|----------|
| 21.86      | 49.384   |
| 24.42      | 50.616   |

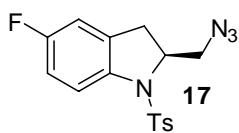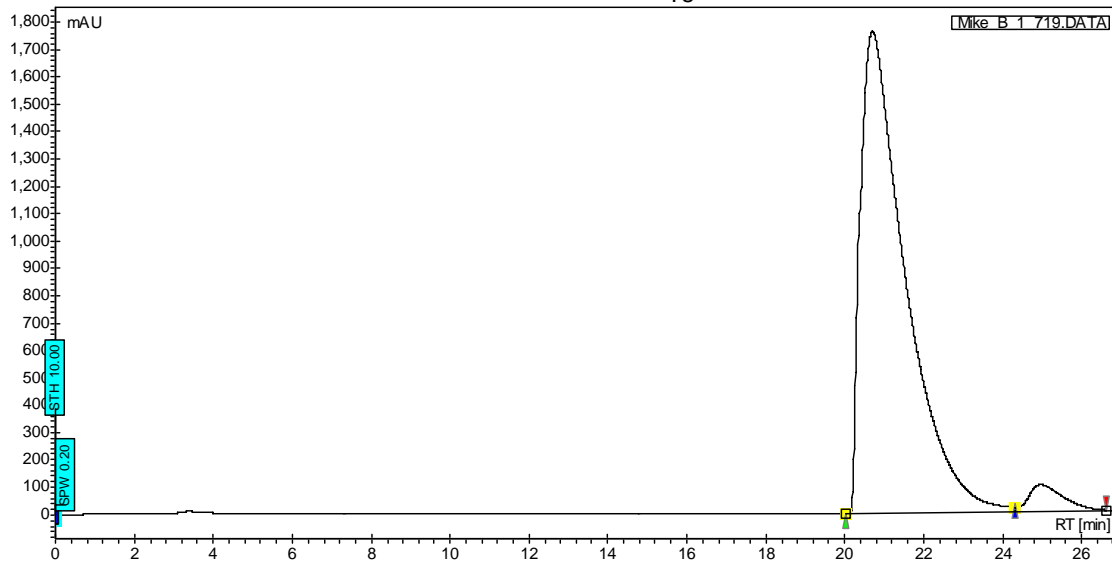

| Time (min) | Area (%) |
|------------|----------|
| 20.71      | 95.956   |
| 24.96      | 4.044    |



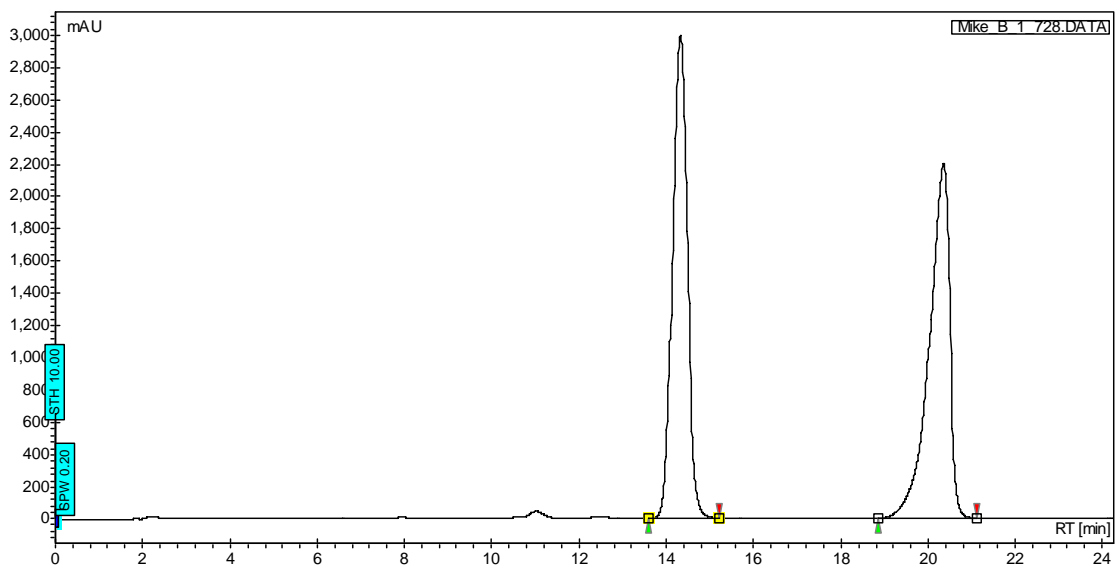

| Time (min) | Area (%) |
|------------|----------|
| 14.32      | 49.822   |
| 20.35      | 50.178   |

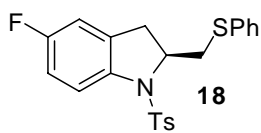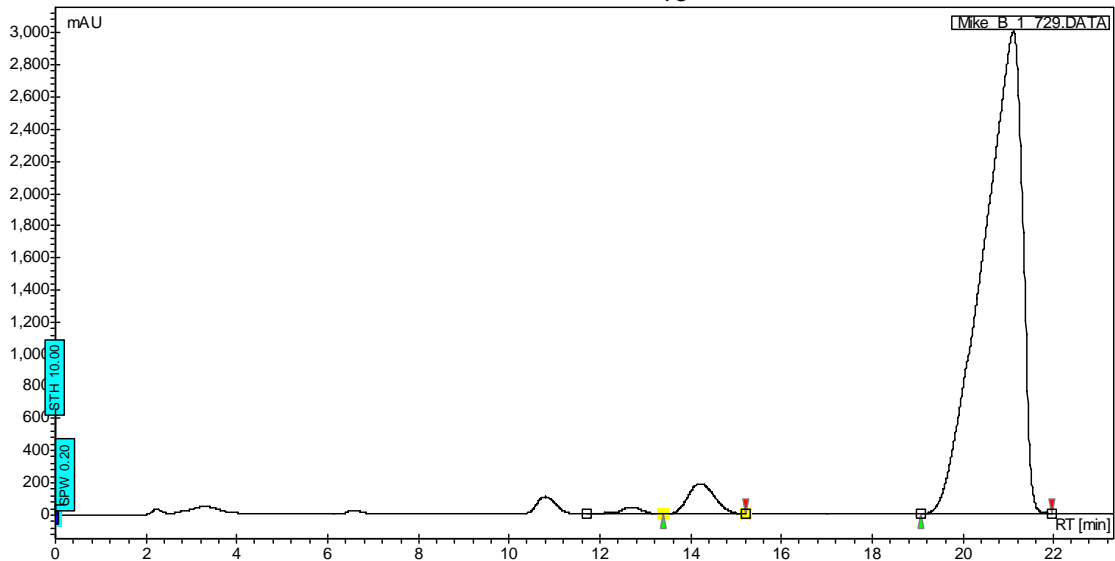

| Time (min) | Area (%) |
|------------|----------|
| 14.21      | 4.087    |
| 21.11      | 95.913   |

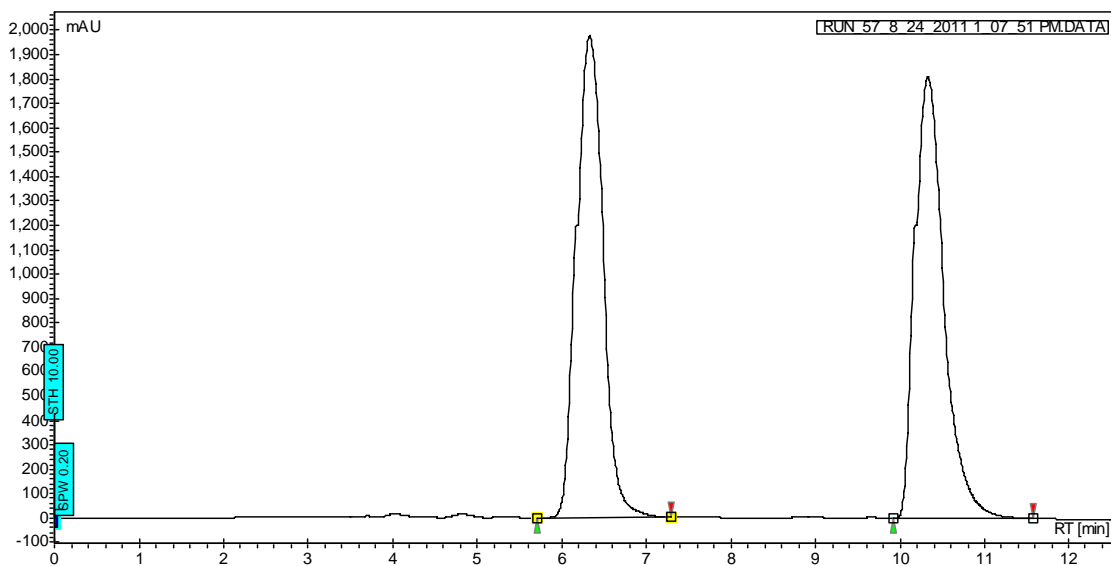

| Time (min) | Area (%) |
|------------|----------|
| 6.33       | 50.062   |
| 10.33      | 49.938   |

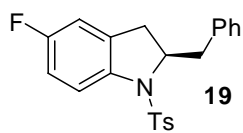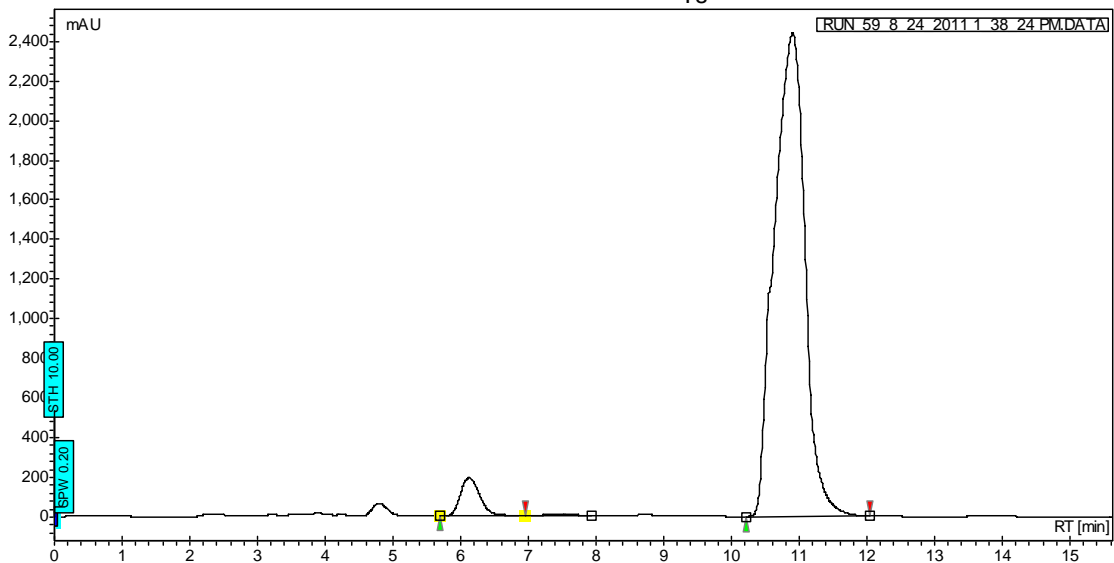

| Time (min) | Area (%) |
|------------|----------|
| 6.12       | 4.841    |
| 10.91      | 95.159   |

## References:

- (1) Masamune, S.; Lowenthal, R. *Patent # US19910789748 19911108* **1994**.
- (2) Denmark, S. E., Stiff, C. *J. Org. Chem.* **2000**, *65*, 5875-5878.
- (3) Huntress, E. H.; Carten, F. H. *J. Am. Chem. Soc.* **1940**, *62*, 511-514.
- (4) Fuller, P. H.; Kim, J.-W.; Chemler, S. R. *J. Am. Chem. Soc.* **2008**, *130*, 17638-17639.
- (5) Hegedus, L. S. M. *J. Am. Chem. Soc.* **1982**, *104*, 2444-2451.
- (6) Yin, Y.; Z., G. *J. Fluor. Chem.* **2007**, *128*, 40-45.
- (7) Muniz, K.; Hovelmann, C. H.; Streuff, J. *J. Am. Chem. Soc.* **2008**, *130*, 763-773.
- (8) Bennasar, M. L. R., T.; Monerri, M.; Garcia-Diaz, D. J. *J. Org. Chem.* **2006**, *71*, 7028-7034.
- (9) Lira, R.; Wolfe, J. P. *J. Am. Chem. Soc.* **2004**, *126*, 13906-13907.
- (10) Sherman, E. S.; Chemler, S. R.; Tan, T. B.; Gerlits, O. *Org. Lett.* **2004**, *6*, 1573-1575.
- (11) El Ali, B.; Okuro, K.; Vasapollo, G.; Alper, H. *J. Am. Chem. Soc.* **1996**, *118*, 4264-4270.
- (12) Michael, F. E. C., B. M. *J. Am. Chem. Soc.* **2006**, *128*, 4246-4247.
- (13) Bender, C. F. W., R. A. *J. Am. Chem. Soc.* **2005**, *127*, 1070-1071.
- (14) Zhang, J. Y.; C.-G.; He, C. *J. Am. Chem. Soc.* **2006**, *128*, 1798-1799.
- (15) Tamaru, Y. H., M.; Higashimura, H.; Yoshida, Z.-I. *J. Am. Chem. Soc.* **1988**, *110*, 3994-4002.
- (16) de Haro, T.; Nevado, C. *Angew. Chem., Int. Ed.* **2011**, *50*, 906-910.
- (17) Sherman, E. S.; Fuller, P. H.; Kasi, D.; Chemler, S. R. *J. Org. Chem.* **2007**, *72*, 3896-3905.
- (18) Miao, L.; Haque, I.; Manzoni, M. R.; Tham, W. S.; Chemler, S. R. *Org. Lett.* **2011**, *12*, 4739-4741.
- (19) Haque, I. Master's dissertation, University at Buffalo, 2009.
- (20) Marcotullio, M. C.; Campagna, V.; Sternativo, S.; Costantino, F.; Curini, M. *Synthesis* **2006**, 2760-2766.
- (21) Flemer, S.; Madalengoitia, J. S. *Synthesis* **2007**, 1848-1860.
- (22) Cahiez, G.; Habiak, V.; Duplais, C.; Moyeux, A. *Angew. Chem., Int. Ed.* **2007**, *46*, 4364-4366.

# NMR Spectra for all new compounds:

Sample Name:  
 Data Collected on: chemmr400.chem.buffalo.edu-inova400  
 Archive directory:  
 Sample directory:  
 Fidfile: PROTON  
 Pulse Sequence: PROTON (s2pul)  
 Solvent: cdcl3  
 Data collected on: Oct 20 2011

Temp. 25.0 C / 298.1 K  
 Operator: Chemier  
 Relax. delay 1.000 sec  
 Pulse 45.0 degrees  
 Acq. time 2.585 sec  
 Width 6387.7 Hz  
 8 repetitions  
 OBSERVE H1, 399.9389027 MHz  
 DATA PROCESSING  
 FT size 32788  
 Total time 0 min 29 sec

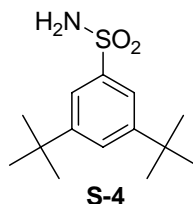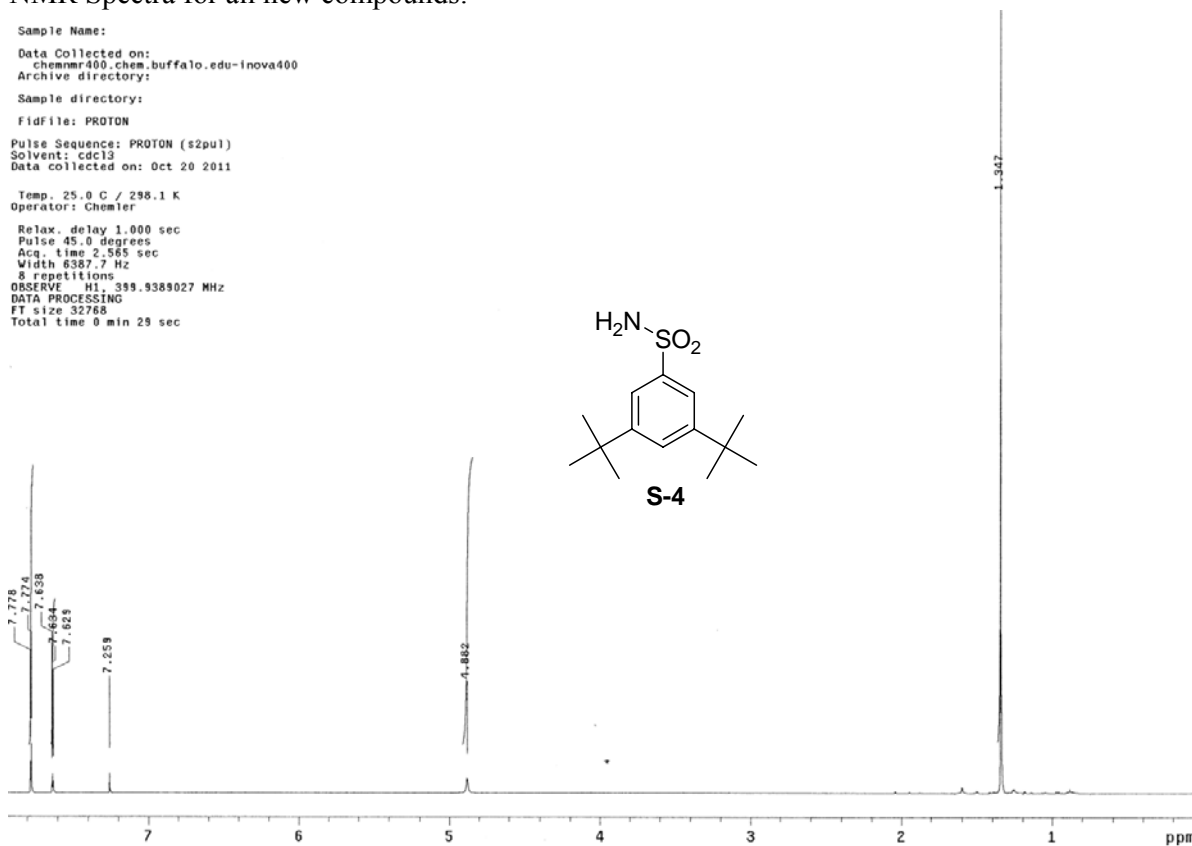

## STANDARD CARBON PARAMETERS

Sample Name:  
 Data Collected on: roesy.chem.buffalo.edu-mercury300  
 Archive directory:  
 Sample directory:  
 Fidfile: CARBON  
 Pulse Sequence: CARBON (s2pul)  
 Solvent: cdcl3  
 Data collected on: Oct 24 2011

Temp. 25.0 C / 298.1 K  
 Operator: Sherry  
 Relax. delay 8.000 sec  
 Pulse 45.0 degrees  
 Acq. time 0.868 sec  
 Width 18867.9 Hz  
 4800 repetitions  
 OBSERVE C13, 75.4536375 MHz  
 DECOUPLE H1, 500.0754430 MHz  
 Power 38 dB  
 Continuously on  
 WALTZ-16 modulated  
 DATA PROCESSING  
 Line broadening 0.5 Hz  
 FT size 32788  
 Total time 11 hr, 54 min

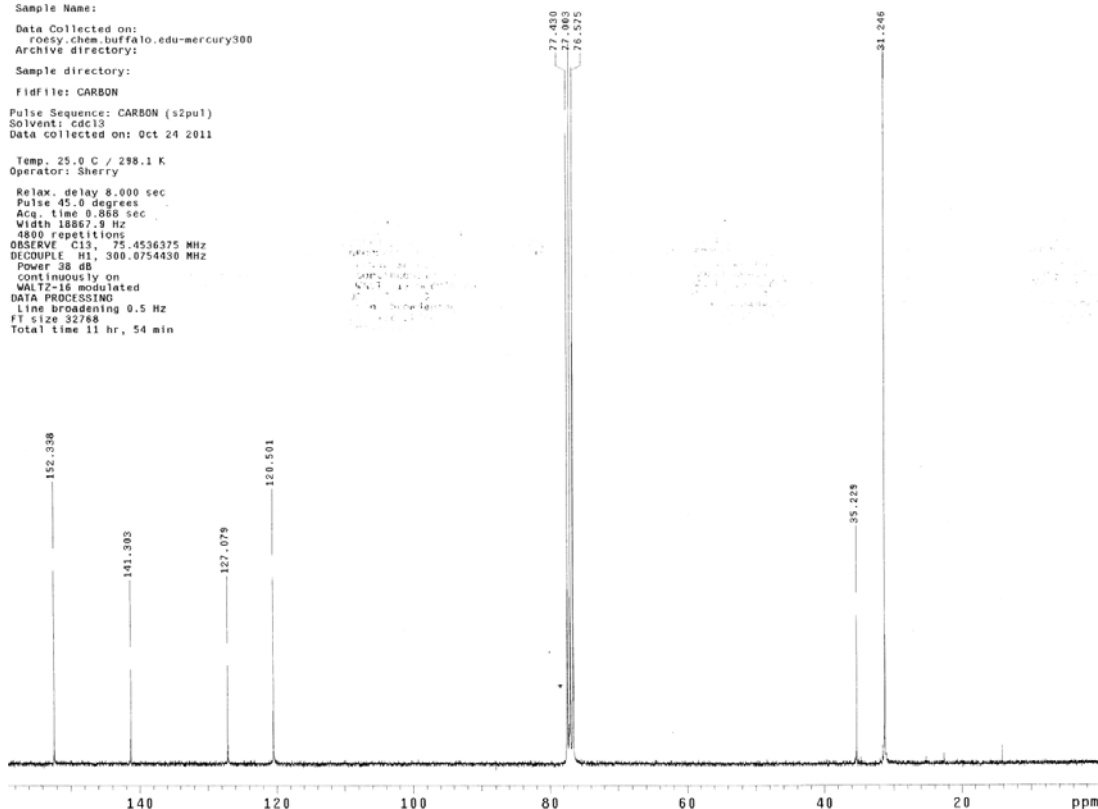

JK-p48-2  
Pulse Sequence: s2pul  
Solvent: CDCl3  
Ambient temperature  
INOVA-500 "tocsy.chem.buffalo.edu"

Relax. delay 2.000 sec  
Pulse 34.6 degrees  
Acq. time 1.591 sec  
Width 10000.0 Hz  
16 repetitions  
OBSERVE H1, 499.8984039 MHz  
DATA PROCESSING  
Line broadening 0.7 Hz  
FT size 65536  
Total time 1 min, 18 sec

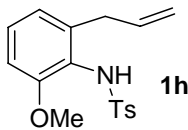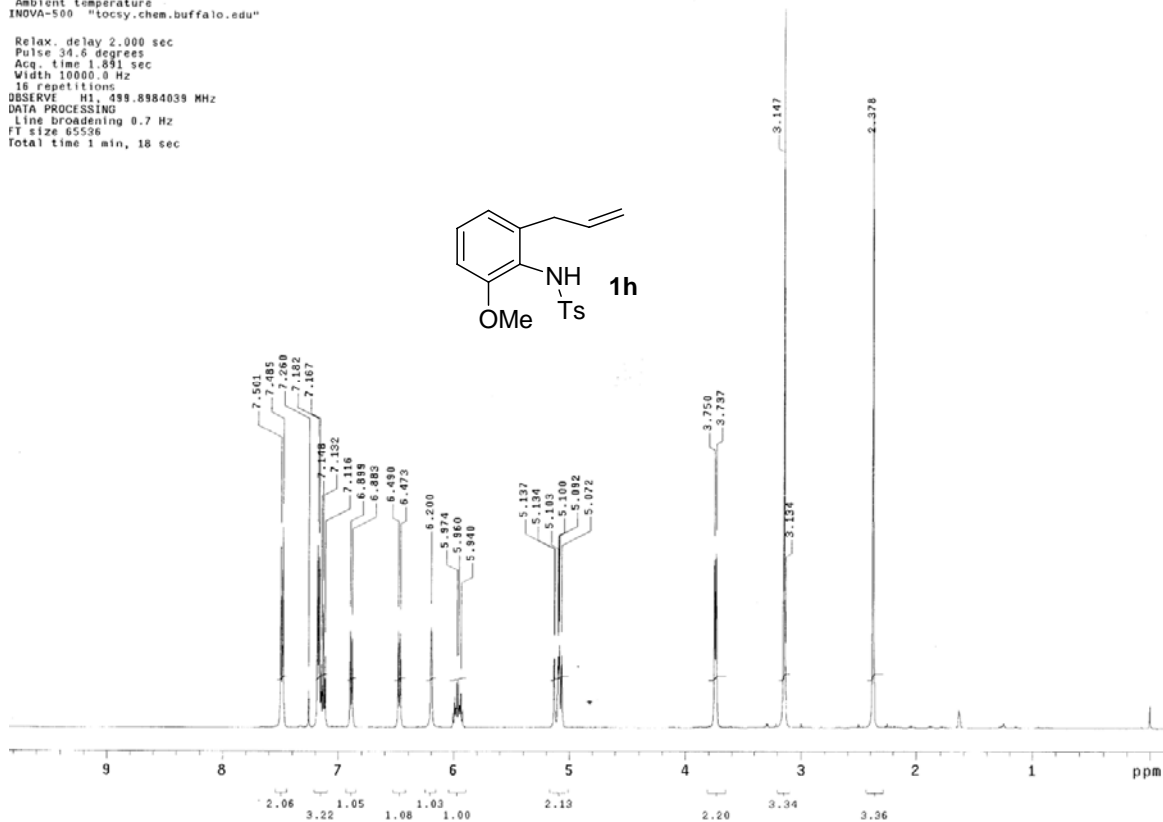

JK-p48-2-c13  
Pulse Sequence: s2pul  
Solvent: CDCl3  
Ambient temperature  
GEMINI-300 "roesy.chem.buffalo.edu"

Relax. delay 5.000 sec  
Pulse 90.0 degrees  
Acq. time 1.706 sec  
Width 18761.7 Hz  
624 repetitions  
OBSERVE C13, 75.4536624 MHz  
DECOUPLE H1, 300.0754431 MHz  
Power 1023 dB  
continuously on  
WALTZ-16 modulated  
DATA PROCESSING  
Line broadening 1.0 Hz  
FT size 65536  
Total time 106 hr, 45 min, 9 sec

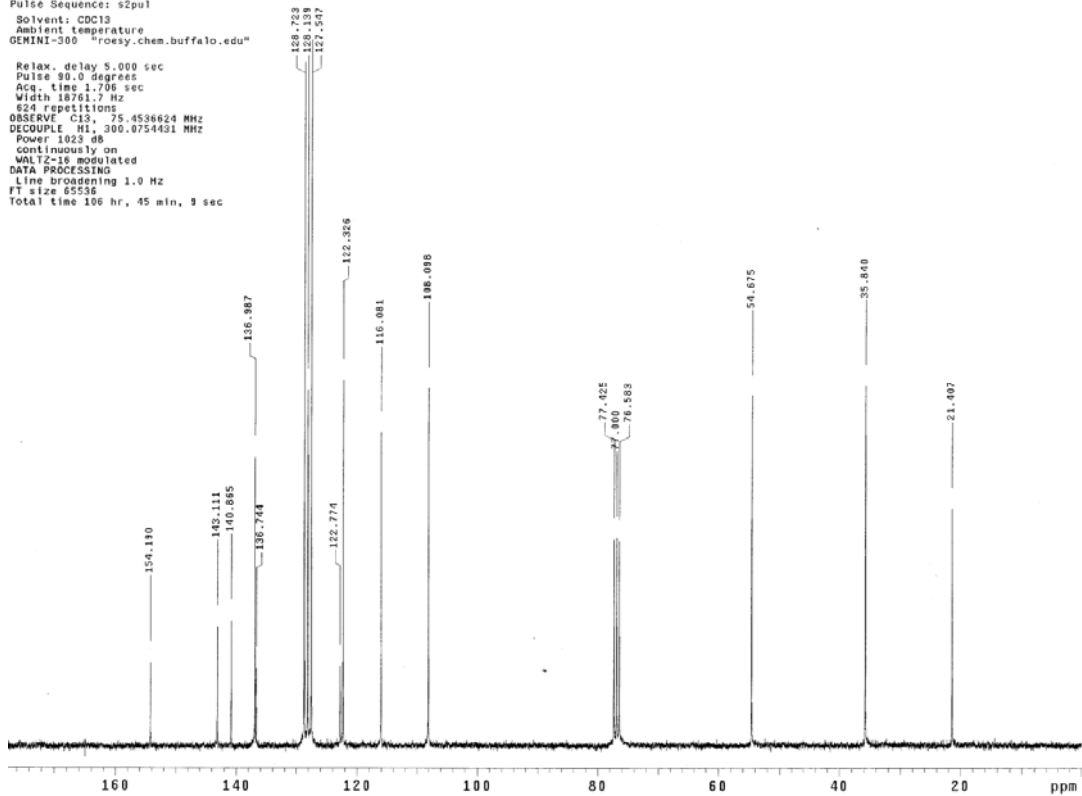

Sample Name:  
 Data Collected on:  
 roesy.chem.buffalo.edu-mercury300  
 Archive directory:  
 Sample directory:  
 FidFile: PROTON  
 Pulse Sequence: PROTON (s2pu1)  
 Solvent: cdcl3  
 Data collected on: Nov 17 2010

Operator: Chemler

Relax. delay 1.000 sec  
 Pulse 45.0 degrees  
 Acq. time 1.705 sec  
 Width 4810.0 Hz  
 8 repetitions  
 OBSERVE H1, 300.073 MHz  
 DATA PROCESSING  
 FT size 32768  
 Total time 1 hr, 22 min, 56 sec

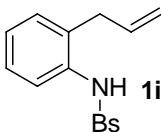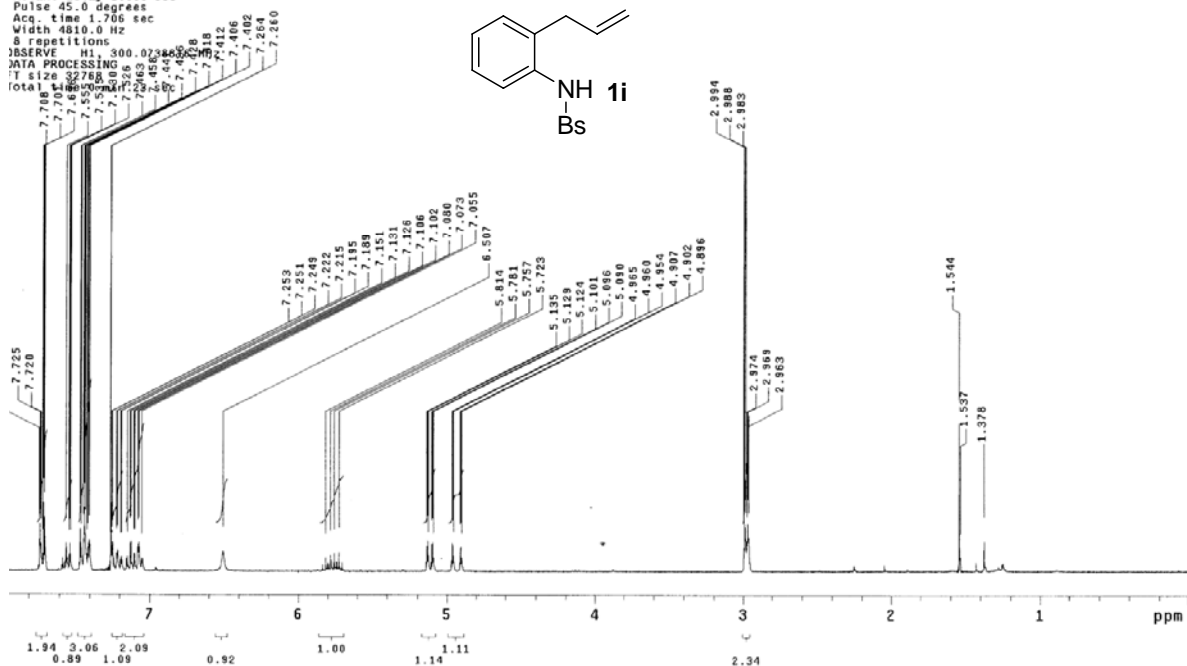

STANDARD CARBON PARAMETERS

Sample Name:  
 Data Collected on:  
 roesy.chem.buffalo.edu-mercury300  
 Archive directory:  
 Sample directory:  
 FidFile: CARBON  
 Pulse Sequence: CARBON (s2pu1)  
 Solvent: cdcl3  
 Data collected on: Dec 20 2010

Operator: Chemler

Relax. delay 10.000 sec  
 Pulse 45.0 degrees  
 Acq. time 0.858 sec  
 Width 18867.9 Hz  
 512 repetitions  
 OBSERVE C13, 75.454330 MHz  
 DECOUPLE H1, 300.073430 MHz  
 Power 38 dB  
 continuously  
 WALTZ-16 modulated  
 DATA PROCESSING  
 Line broadening 0.15 Hz  
 FT size 32768  
 Total time 1 hr, 33 min

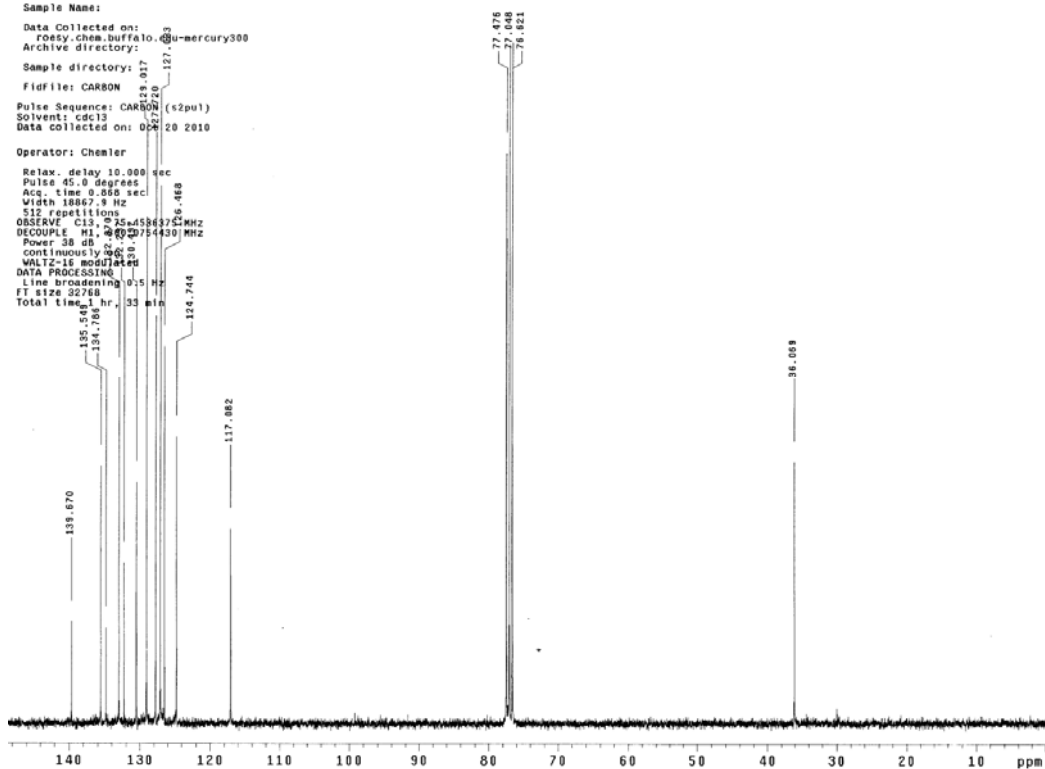

Sample Name:  
 Data Collected on:  
 chemmr400.chem.buffalo.edu-inova400  
 Archive directory:  
 Sample directory:  
 Fidfile: PROTON  
 Pulse Sequence: PROTON (s2pul)  
 Solvent: cdcl3  
 Data collected on: Sep 29 2011  
 Temp. 25.0 C / 298.1 K  
 Operator: Chemier  
 Relax. delay 2.000 sec  
 Pulse 45.0 degrees  
 Acq. time 2.565 sec  
 Width 6387.7 Hz  
 8 repetitions  
 OBSERVE H1, 399.9389027 MHz  
 DATA PROCESSING  
 FT size 32768  
 Total time 0 min 29 sec

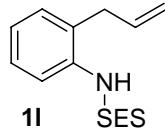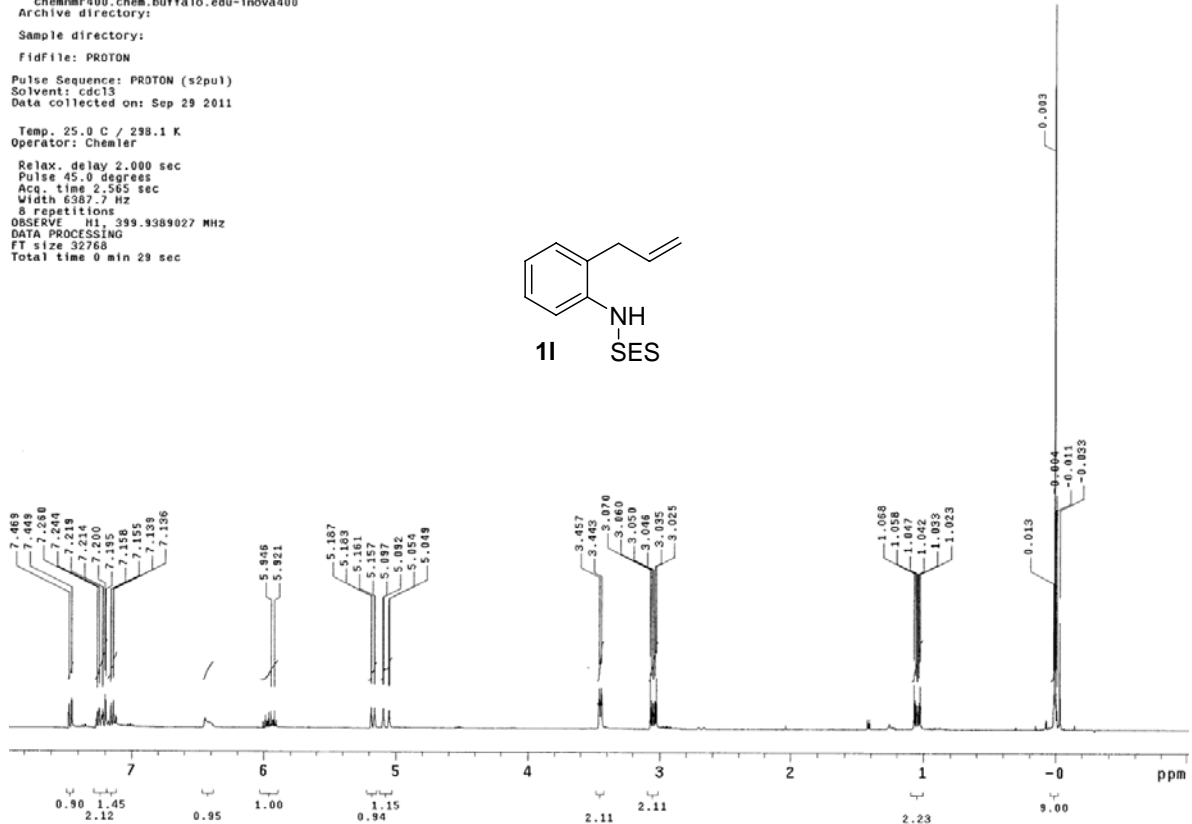

Sample Name:  
 Data Collected on:  
 roesy.chem.buffalo.edu-mercury300  
 Archive directory:  
 Sample directory:  
 Fidfile: CARBON  
 Pulse Sequence: CARBON (s2pul)  
 Solvent: cdcl3  
 Data collected on: Oct 3 2011  
 Temp. 22.0 C / 295.1 K  
 Operator: Sherry  
 Relax. delay 8.000 sec  
 Pulse 45.0 degrees  
 Acq. time 0.885 sec  
 Width 18887.3 Hz  
 1088 repetitions  
 OBSERVE C13, 75.4536412 MHz  
 DECOUPLE H1, 300.0754430 MHz  
 Power 38 dB  
 continuously on  
 WALTZ-16 modulated  
 DATA PROCESSING  
 Line broadening 0.5 Hz  
 FT size 32768  
 Total time 2 hr, 41 min

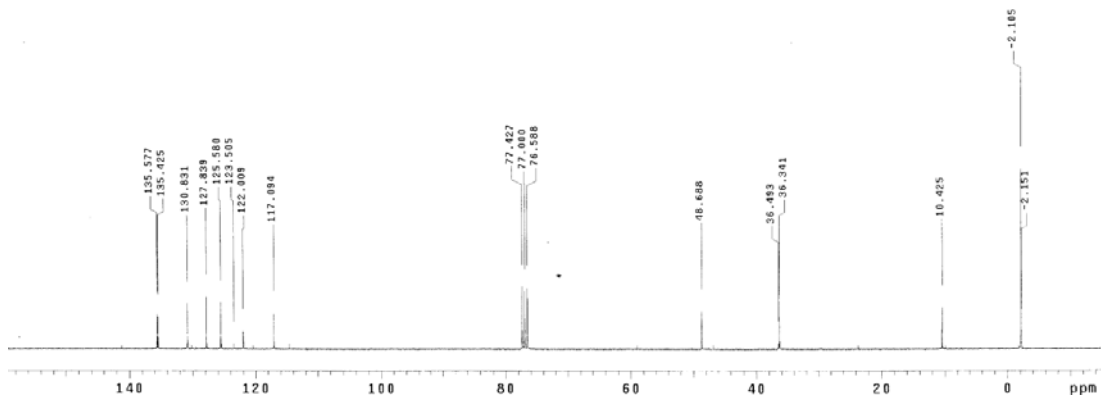

Sample Name:  
 Data Collected on:  
 chemmr400.chem.buffalo.edu-inova400  
 Archive directory:  
 Sample directory:  
 Fidfile: MTB-1-67  
 Pulse Sequence: PROTON (s2pu1)  
 Solvent: cdcl3  
 Data collected on: Oct 26 2010  
 Temp. 25.0 C / 298.1 K  
 Operator: Chemler  
 Relax. delay 1.000 sec  
 Pulse 45.0 degrees  
 Acq. time 2.585 sec  
 Width 6387.7 Hz  
 8 repetitions  
 OBSERVE H1, 399.9389071 MHz  
 DATA PROCESSING  
 FT size 32768  
 Total time 0 min 29 sec

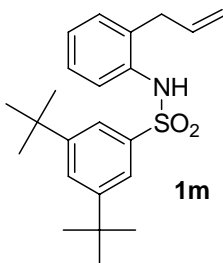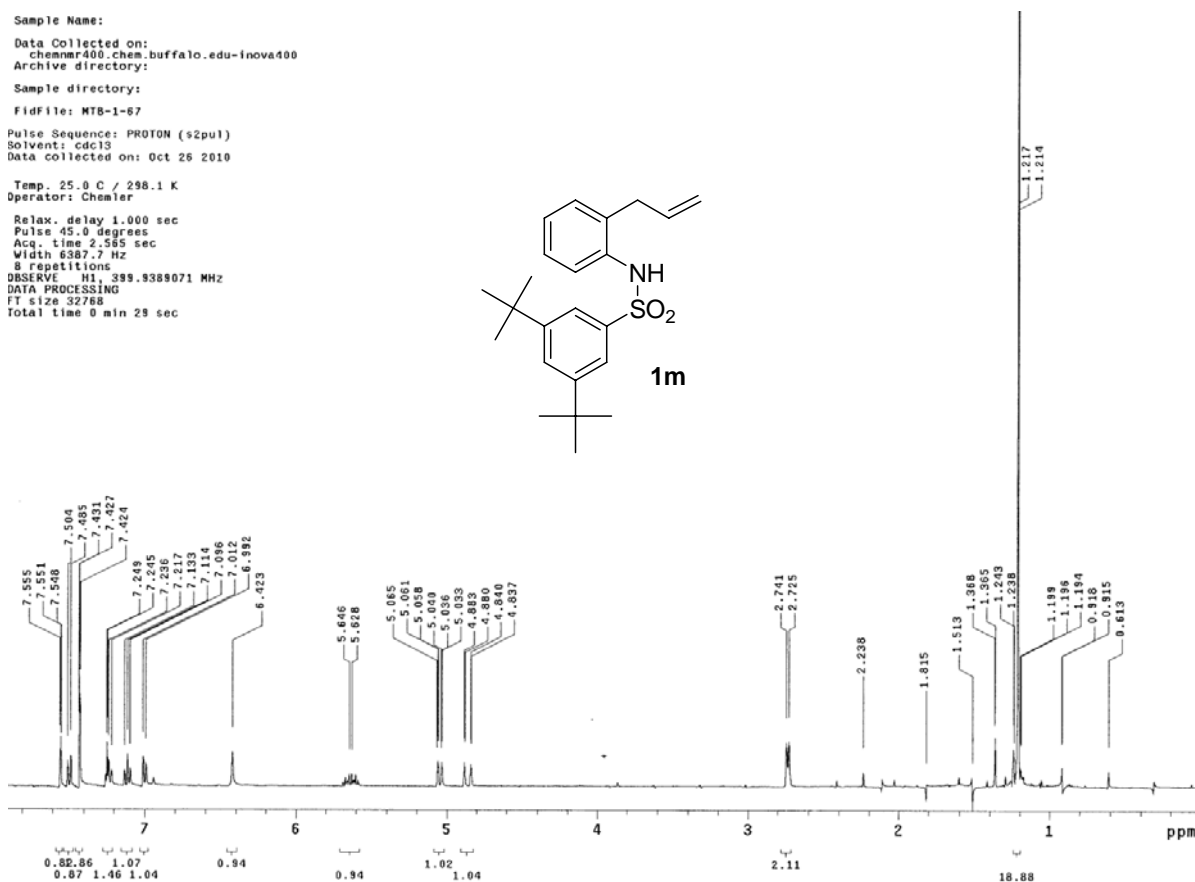

Sample Name:  
 Data Collected on:  
 roesy.chem.buffalo.edu-mercury300  
 Archive directory:  
 Sample directory:  
 Fidfile: CARBON  
 Pulse Sequence: CARBON (s2pu1)  
 Solvent: cdcl3  
 Data collected on: Oct 26 2010  
 Operator: Chemler  
 Relax. delay 10.000 sec  
 Pulse 45.0 degrees  
 Acq. time 0.888 sec  
 Width 18867.9 Hz  
 576 repetitions  
 OBSERVE C13, 75.4536377 MHz  
 DECOUPLE H1, 300.0754430 MHz  
 Power 38 db  
 continuously on  
 WALTZ-16 modulated  
 DATA PROCESSING  
 Line broadening 0.5 Hz  
 FT size 32768  
 Total time 2 hr, 19 min

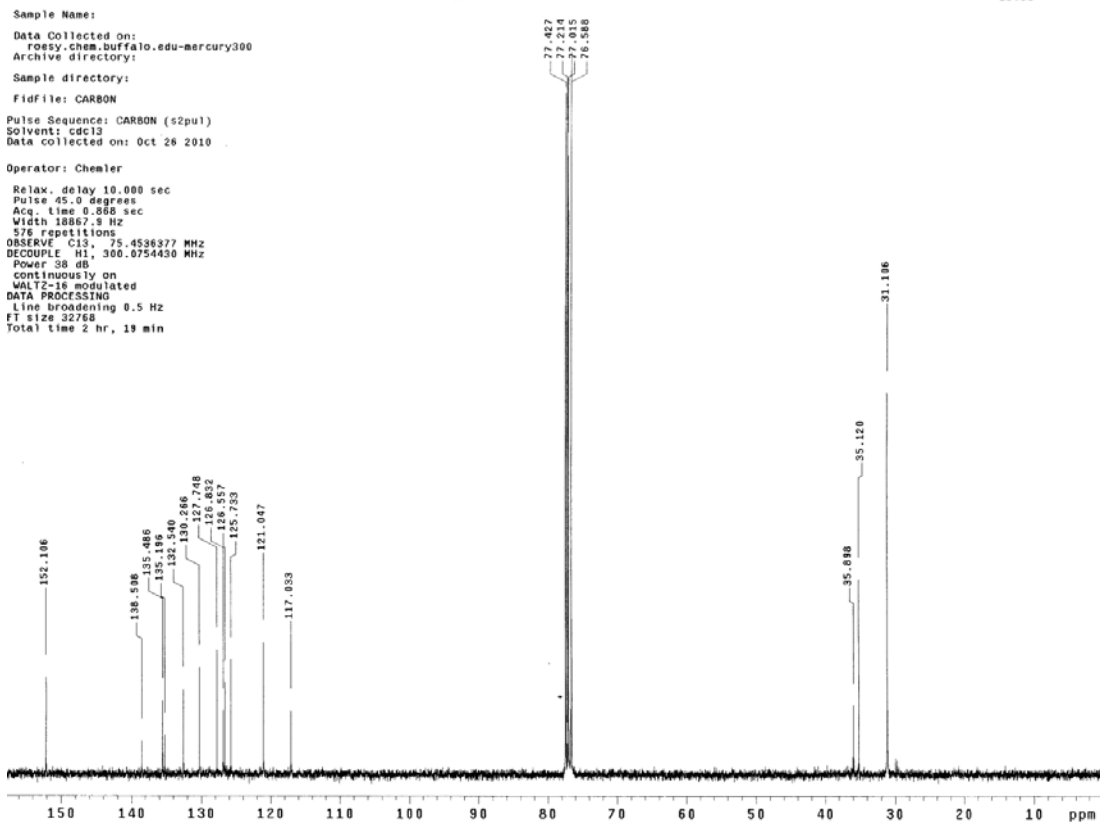



STANDARD IN OBSERVE

Pulse Sequence: s2pu1  
Solvent: CDCl3  
Ambient temperature  
INDVA-400 "cosy.chem.buffalo.edu"

Relax. delay 1.000 sec  
Pulse 47.9 degrees  
Acq. time 1.860 sec  
Width 6000.6 Hz  
16 repetitions  
OBSERVE R1, 599.9389106 MHz  
DATA PROCESSING  
Line broadening 0.9 Hz  
FT size 32768  
Total time 0 min, 44 sec

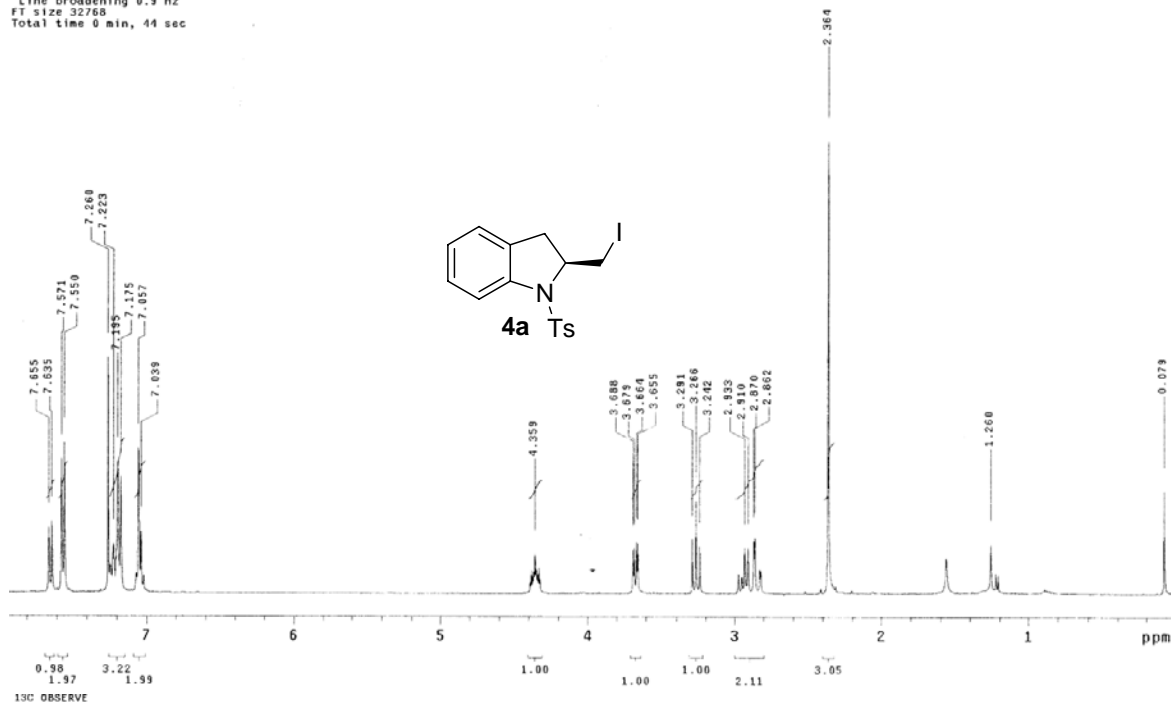

13C OBSERVE

Pulse Sequence: s2pu1  
Solvent: CDCl3  
Ambient temperature  
GEMINI-300 "roesy.chem.buffalo.edu"

Relax. delay 8.000 sec  
Pulse 90.0 degrees  
Acq. time 1.706 sec  
Width 18761.7 Hz  
3920 repetitions  
OBSERVE C13, 75.4536607 MHz  
DECOUPLE H1, 300.0754431 MHz  
Power 1023 dB  
continuously on  
WALTZ-16 modulated  
DATA PROCESSING  
Line broadening 1.0 Hz  
FT size 65536  
Total time 11 hr, 22 min, 40 sec

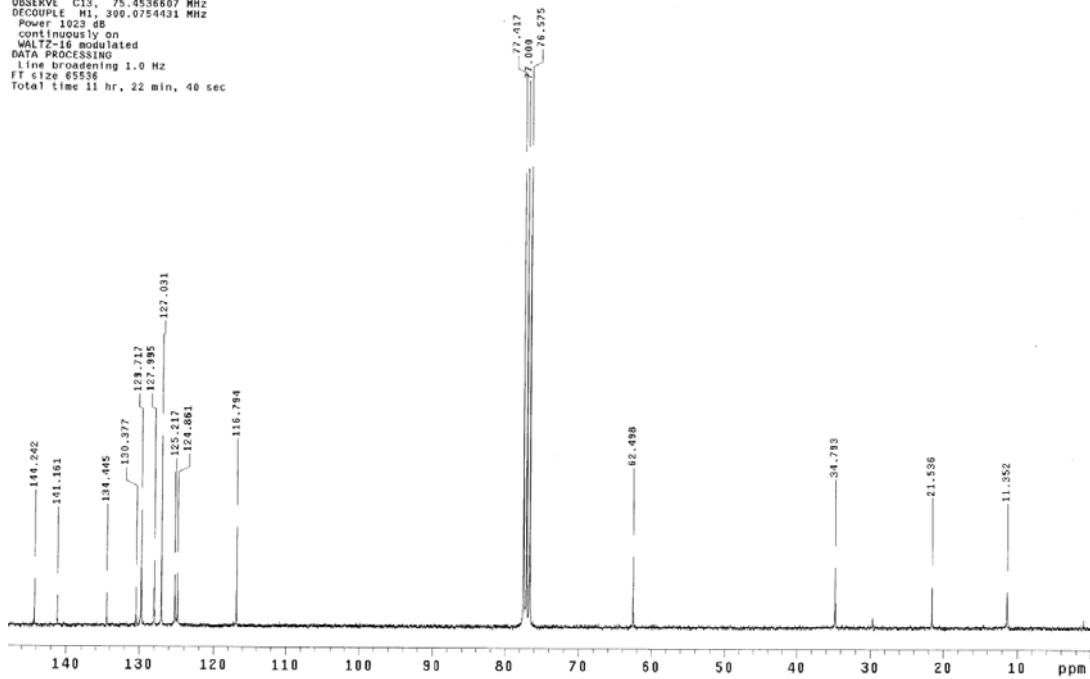

STANDARD 1H OBSERVE

Pulse Sequence: s2pu1  
 Solvent: CDCl3  
 Ambient Temperature  
 INOVA-400 "cosy.chem.buffalo.edu"  
 Relax. delay 1.000 sec  
 Pulse 47.5 degrees  
 Acq. time 1.800 sec  
 Width 6000.6 Hz  
 16 repetitions  
 OBSERVE F1 = 399.9389095 MHz  
 DATA PROCESSING  
 Line broadening 0.3 Hz  
 FT size 32768  
 Total time 0 min, 44 sec

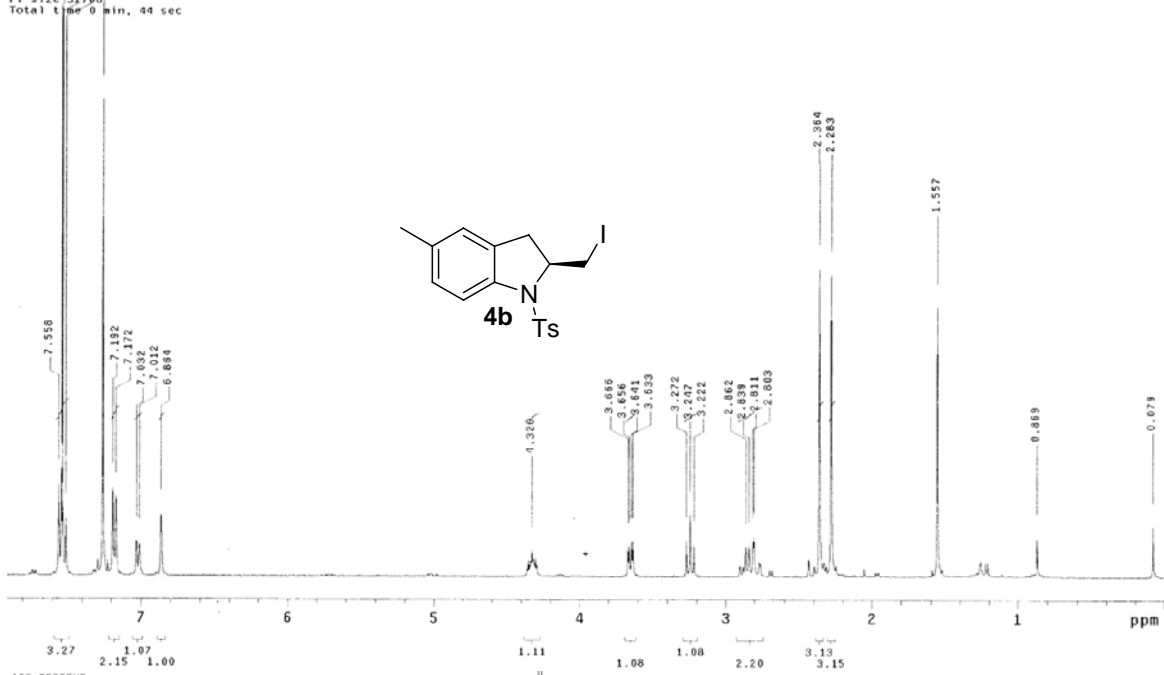

13C OBSERVE

Pulse Sequence: s2pu1  
 Solvent: CDCl3  
 Ambient Temperature  
 GEMINI-300 "roesy.chem.buffalo.edu"  
 Relax. delay 8.000 sec  
 Pulse 30.0 degrees  
 Acq. time 1.706 sec  
 Width 18761.7 Hz  
 1552 repetitions  
 OBSERVE C13, 75.4536589 MHz  
 DECOUPLE H1, 300.0754431 MHz  
 Power 1023 dB  
 continuously on  
 WALTZ-16 modulated  
 DATA PROCESSING  
 Line broadening 1.0 Hz  
 FT size 65528  
 Total time 5 hr, 41 min, 47 sec

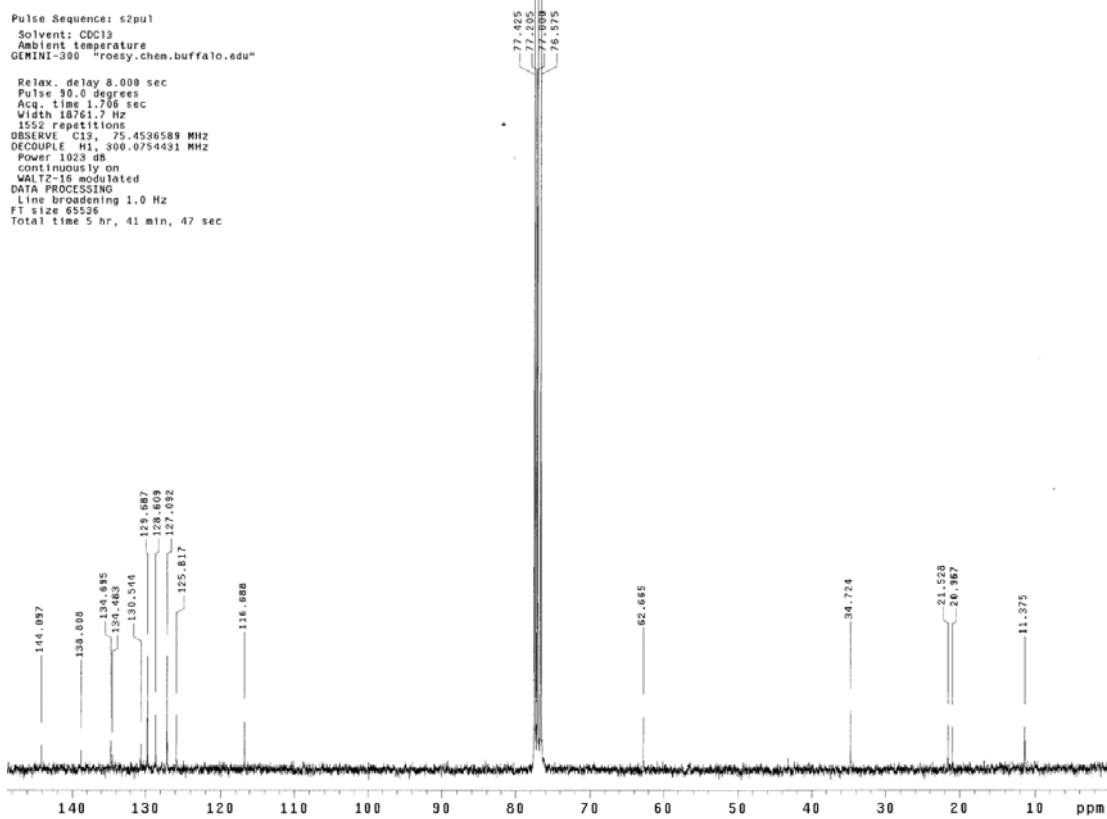

Sample Name:  
 Data Collected on:  
 chemm400.chem.buffalo.edu-inova400  
 Archive directory:  
 Sample directory:  
 Fidfile: PROTON  
 Pulse Sequence: PROTON (s2pul)  
 Solvent: cdcl3  
 Data collected on: Dec 2 2011  
 Temp. 25.0 C / 298.1 K  
 Operator: Chemler  
 Relax. delay 1.000 sec  
 Pulse 45.0 degrees  
 Acq. time 2.565 sec  
 Width 6387.7 Hz  
 8 repetitions  
 OBSERVE H1, 399.9389027 MHz  
 DATA PROCESSING  
 FT size 32768  
 Total time 0 min 29 sec

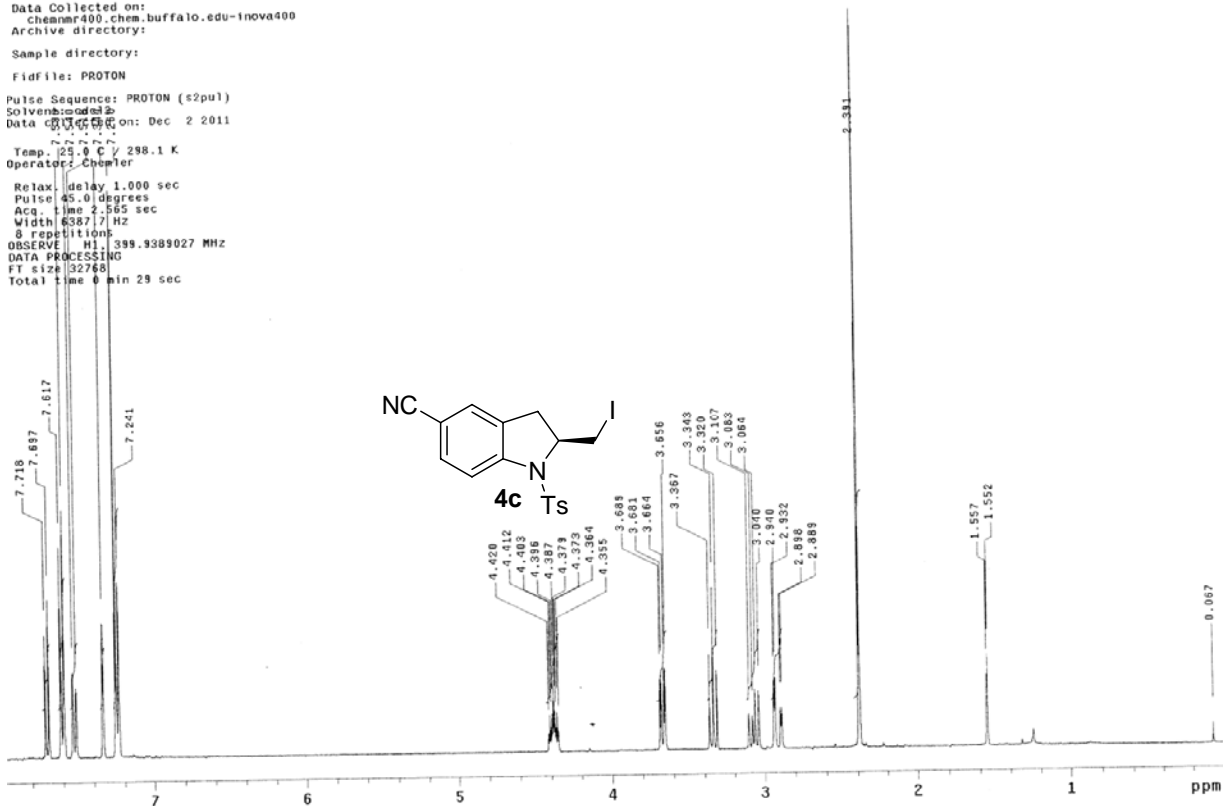

0.960 97 2.91  
 1.91 0.83  
 Sample Name:  
 Data Collected on:  
 roesy.chem.buffalo.edu-mercury300  
 Archive directory:  
 Sample directory:  
 Fidfile: CARBON  
 Pulse Sequence: CARBON (s2pul)  
 Solvent: cdcl3  
 Data collected on: Aug 24 2010  
 Operator: Chemler  
 Relax. delay 10.000 sec  
 Pulse 45.0 degrees  
 Acq. time 0.868 sec  
 Width 18867.8 Hz  
 4086 repetitions  
 OBSERVE C13, 75.4536975 MHz  
 DECOUPLE H1, 300.0754430 MHz  
 Power 38 dB  
 continuously on  
 WALTZ-16 modulated  
 DATA PROCESSING  
 Line broadening 0.5 Hz  
 FT size 32768  
 Total time 12 hr, 26 min

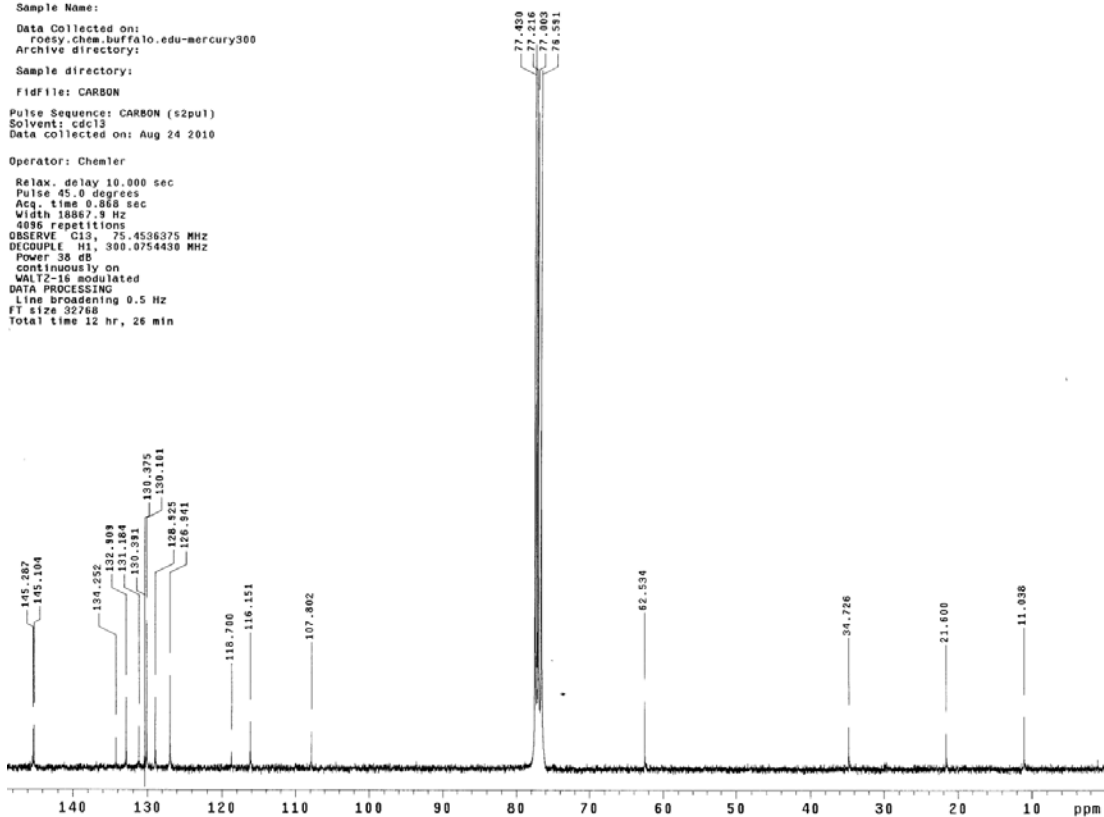

Sample Name:  
 Data Collected on: chemnar400.chem.buffalo.edu-inova400  
 Archive directory:  
 Sample directory:  
 FidFile: PROTON  
 Pulse Sequence: PROTON (s2pul)  
 Solvent: cdcl3  
 Data collected on: Oct 7 2010

Temp. 25.0 C / 298.1 K  
 Operator: Chemler

Relax. delay 2.000 sec  
 Pulse 45.0 degrees  
 Acq. time 2.585 sec  
 Width 6387.7 Hz  
 8 repetitions  
 OBSERVE H1, 399.3389027 MHz  
 DATA PROCESSING  
 FT size 32768  
 Total time 0 min 29 sec

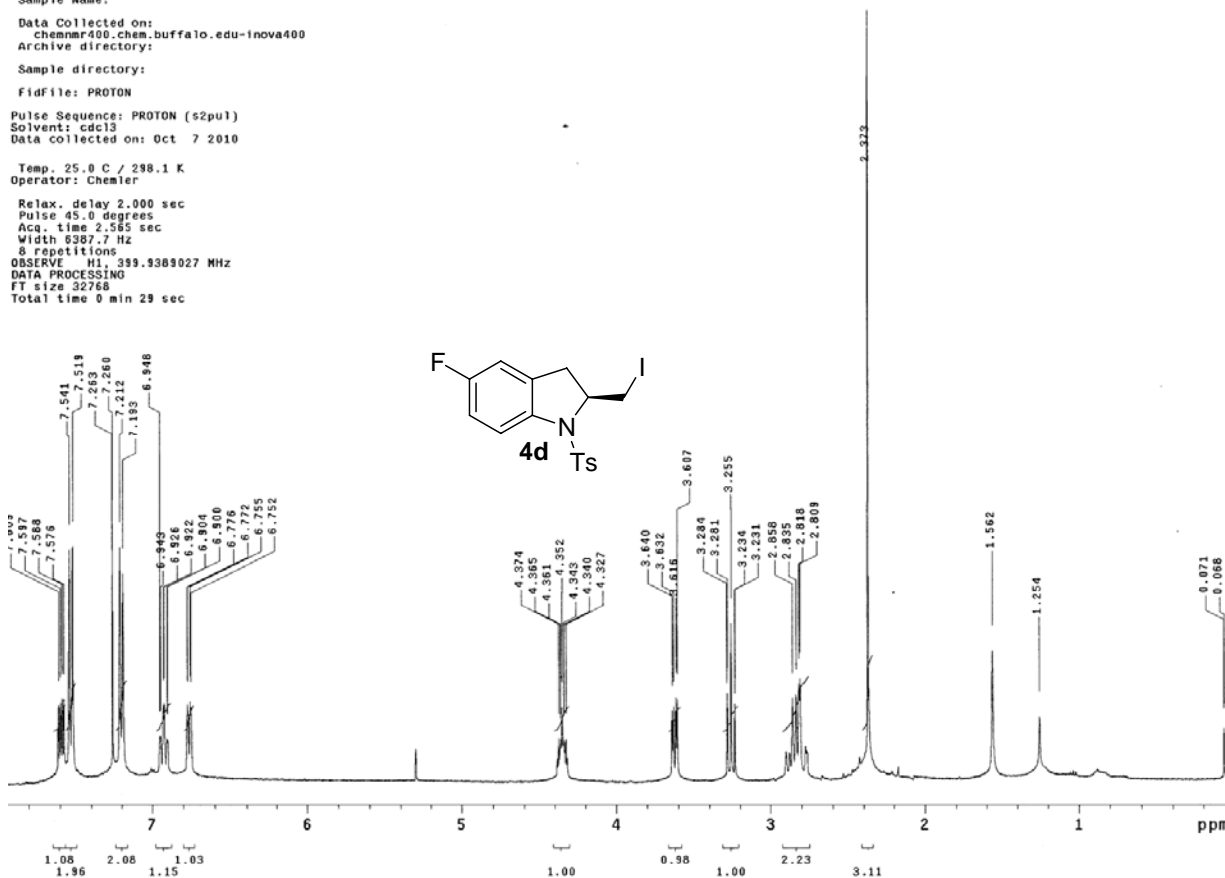

Sample Name:  
 Data Collected on: roesy.chem.buffalo.edu-mercury300  
 Archive directory:  
 Sample directory:  
 FidFile: MTS-1-30-pg217-f31-48-prep2  
 Pulse Sequence: CARBON (s2pul)  
 Solvent: cdcl3  
 Data collected on: Oct 6 2010  
 Operator: Chemler

Relax. delay 10.000 sec  
 Pulse 45.0 degrees  
 Acq. time 0.868 sec  
 Width 18867.9 Hz  
 3804 repetitions  
 OBSERVE C13, 75.4536375 MHz  
 DECOUPLE H1, 300.0754430 MHz  
 Power 38 dB  
 continuously on  
 WALTZ-16 modulated  
 DATA PROCESSING  
 Line broadening 0.5 Hz  
 FT size 32768  
 Total time 12 hr, 26 min

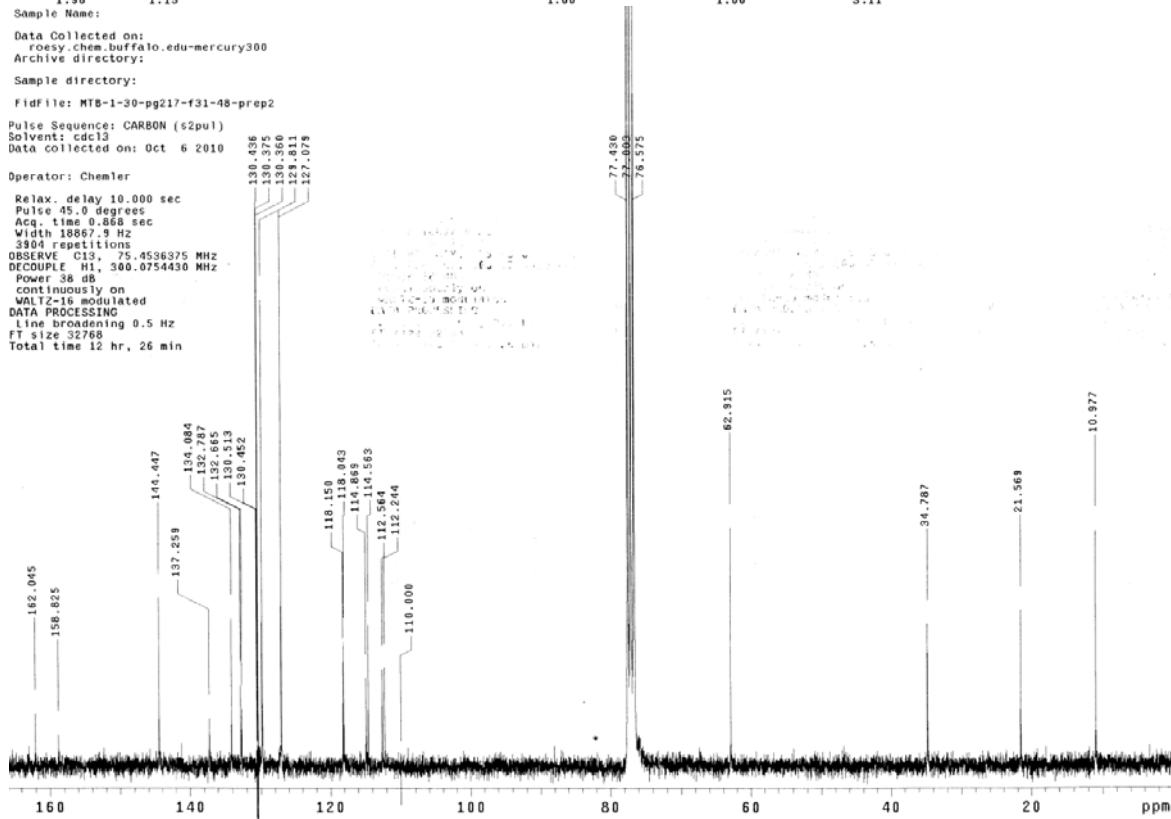

Sample Name:  
 Data Collected on:  
 chemmr400.chem.buffalo.edu-inova400  
 Archive directory:  
 Sample directory:  
 FidFile: PROTON  
 Pulse Sequence: PROTON (s2pul)  
 Solvent: cdcl3  
 Data collected on: Aug 19 2010

Temp. 25.0 C / 298.1 K  
 Operator: Chemler  
 Relax. delay 1.000 sec  
 Pulse 45.0 degrees  
 Acq. time 2.048 sec  
 Width 8000.0 Hz  
 8 repetitions  
 OBSERVE H1, 399.9389021 MHZ  
 DATA PROCESSING  
 FT size 32788  
 Total time 0 min 25 sec

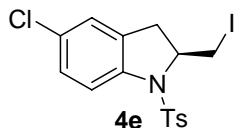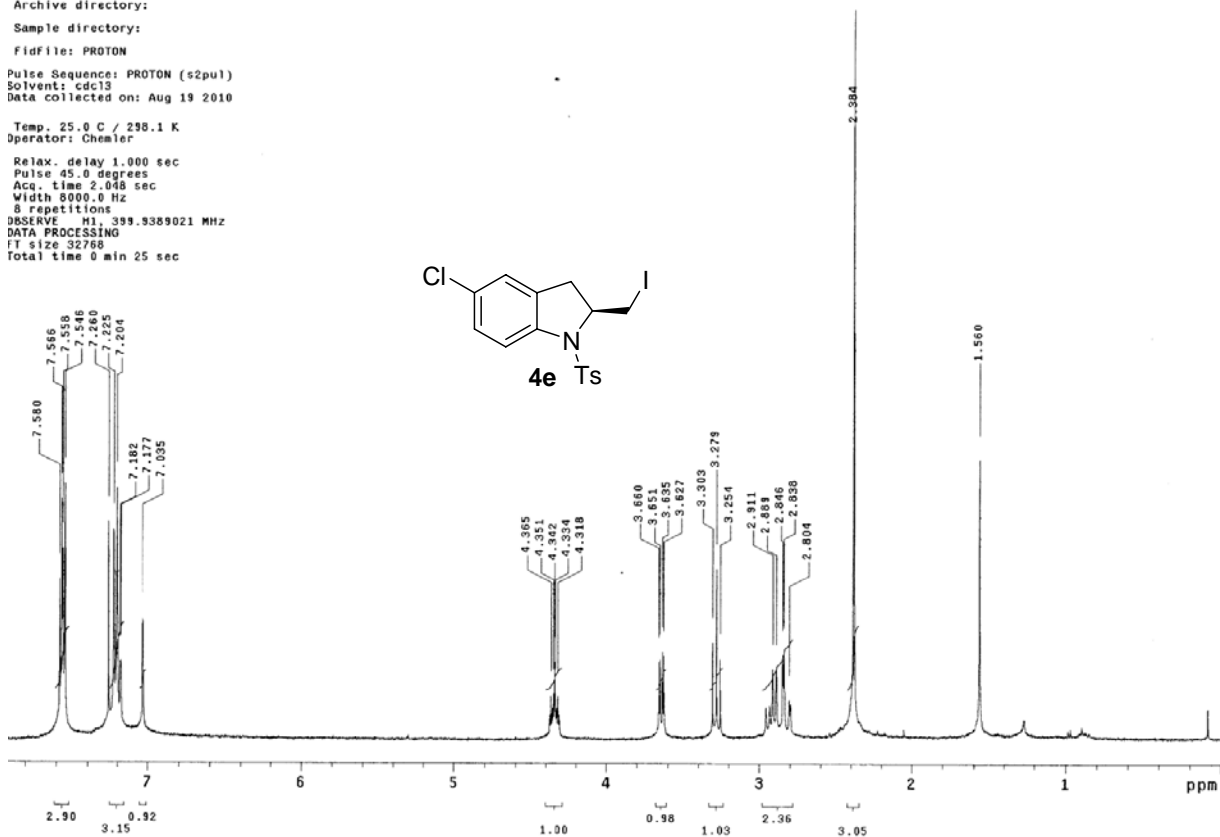

STANDARD CARBON PARAMETERS

Sample Name:  
 Data Collected on:  
 roesy.chem.buffalo.edu-mercury300  
 Archive directory:  
 Sample directory:  
 FidFile: CARBON  
 Pulse Sequence: CARBON (s2pul)  
 Solvent: cdcl3  
 Data collected on: Nov 29 2010

Operator: Chemler  
 Relax. delay 10.000 sec  
 Pulse 45.0 degrees  
 Acq. time 0.868 sec  
 Width 18867.9 Hz  
 4096 repetitions  
 OBSERVE C13, 75.4536388 MHZ  
 DECOUPLE H1, 300.0754430 MHZ  
 Power 38 dB  
 Continuously on  
 WALTZ-16 modulated  
 DATA PROCESSING  
 Line broadening 0.5 Hz  
 FT size 32768  
 Total time 12 hr, 26 min

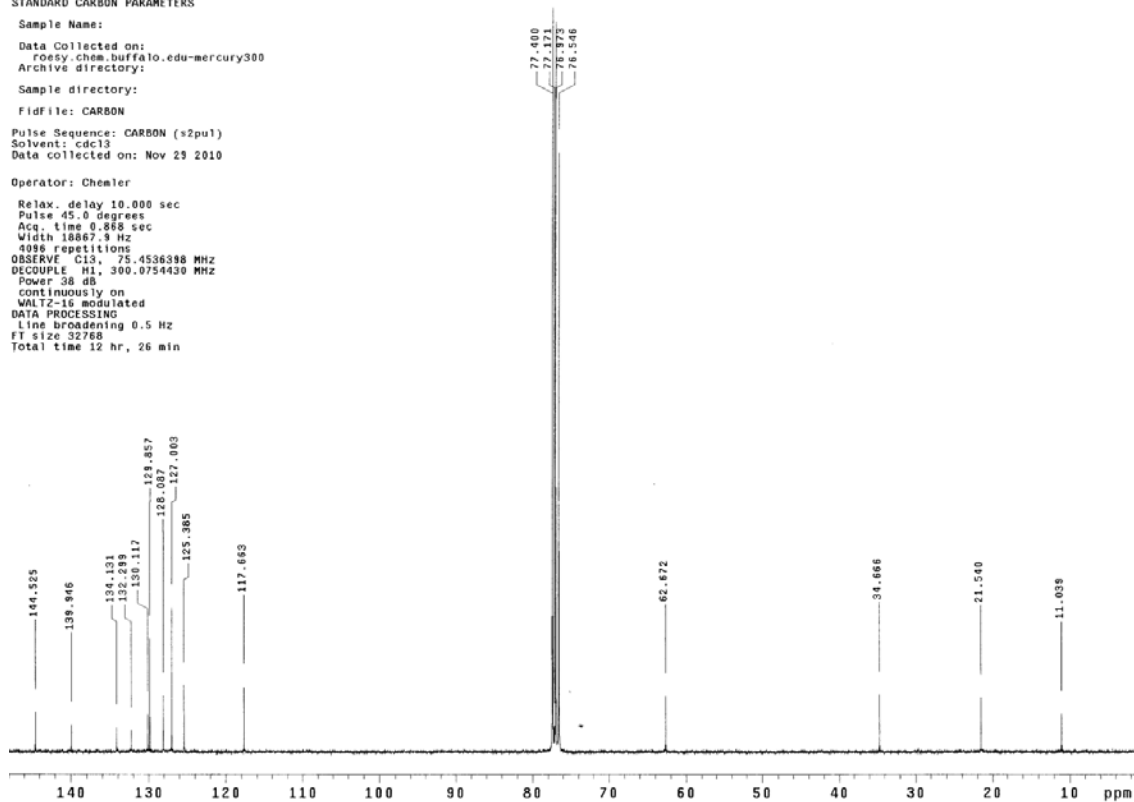

## STANDARD 1H OBSERVE

Pulse Sequence: s2pul  
 Solvent: CDCl3  
 Ambient temperature  
 INOVA-400 "cozy.chem.buffalo.edu"

Relax. delay 1.000 sec  
 Pulse 47.9 degrees  
 Acq. time 1.800 sec  
 Width 6000.6 Hz  
 16 repetitions  
 OBSERVE H1, 399.9389095 MHz  
 DATA PROCESSING  
 Line broadening 0.9 Hz  
 FT size 32768  
 Total time 0 min, 44 sec

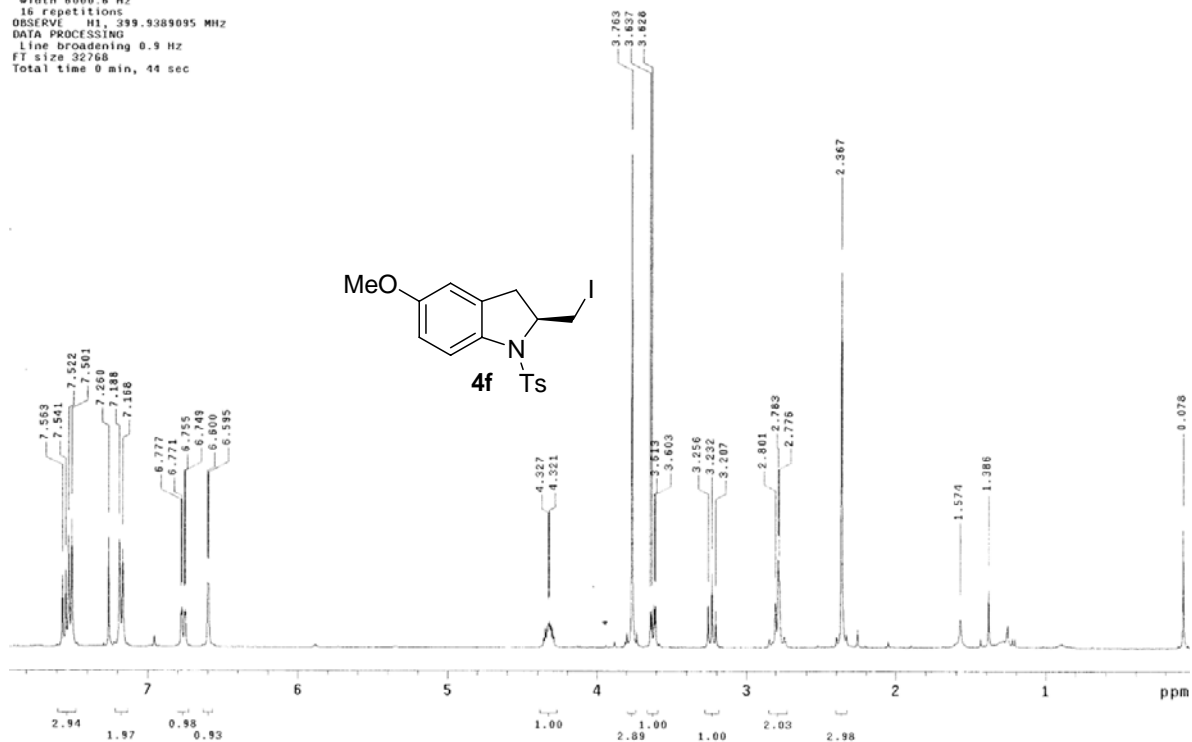

## 13C OBSERVE

Pulse Sequence: s2pul  
 Solvent: CDCl3  
 Ambient temperature  
 GEMINI-300 "roesy.chem.buffalo.edu"

Relax. delay 8.000 sec  
 Pulse 90.0 degrees  
 Acq. time 1.706 sec  
 Width 28761.7 Hz  
 4000 repetitions  
 OBSERVE C13, 75.4536589 MHz  
 DECOUPLE H1, 300.0754451 MHz  
 Power 1023 dB  
 Continuously on  
 WALTZ-16 modulated  
 DATA PROCESSING  
 Line broadening 1.0 Hz  
 FT size 65536  
 Total time 11 hr, 22 min, 40 sec

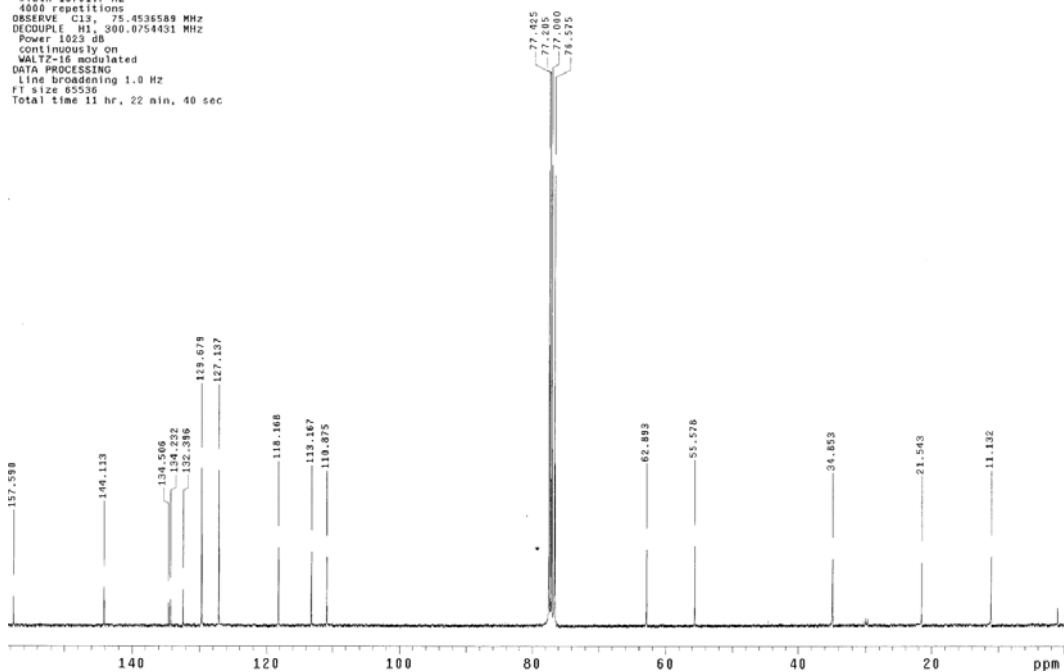

Sample Name:  
 Data Collected on:  
 chemmr400.chem.buffalo.edu-inova400  
 Archive directory:  
 Sample directory:  
 FidFile: MTB-2-101-pg79-f26-45-prep2  
 Pulse Sequence: PROTON (s2pul)  
 Solvent: cdcl3  
 Data collected on: Aug 6 2011

Temp. 25.0 C / 298.1 K  
 Operator: Chemler  
 Relax. delay 2.000 sec  
 Pulse 45.0 degrees  
 Acq. time 2.565 sec  
 Width 6367.7 Hz  
 8 repetitions  
 OBSERVE F1: 399.9389071 MHz  
 DATA PROCESSING  
 FT size 32768  
 Total time 0 min 29 sec

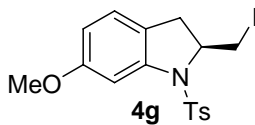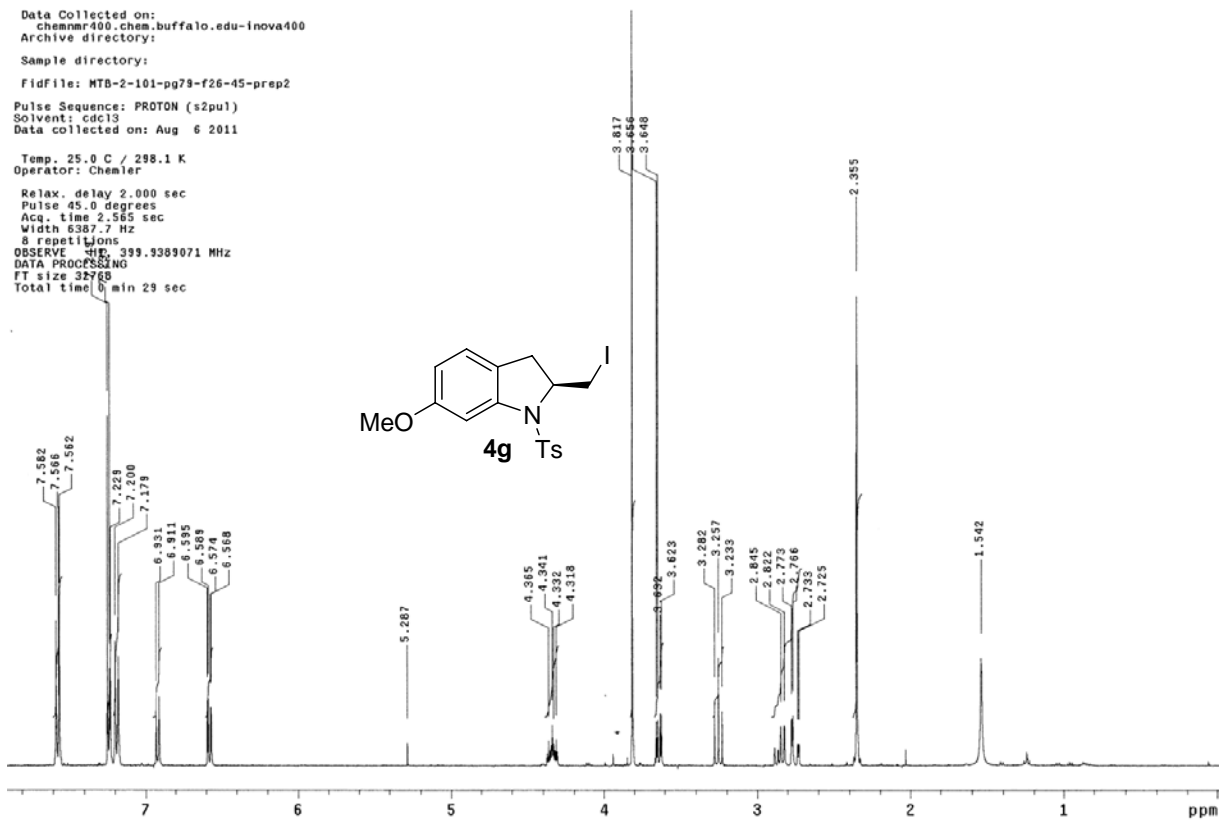

Sample Name:  
 Data Collected on:  
 roesy.chem.buffalo.edu-mercury300  
 Archive directory:  
 Sample directory:  
 FidFile: CARBON  
 Pulse Sequence: CARBON (s2pul)  
 Solvent: cdcl3  
 Data collected on: Sep 26 2011

Temp. 22.0 C / 295.1 K  
 Operator: Chemler  
 Relax. delay 8.000 sec  
 Pulse 45.0 degrees  
 Acq. time 0.869 sec  
 Width 18867.9 Hz  
 4992 repetitions  
 OBSERVE C13: 75.4536366 MHz  
 DECOUPLE H1: 300.0754430 MHz  
 Power 38 dB  
 Continuously On  
 WALTZ-16 modulated  
 DATA PROCESSING  
 Line broadening 0.5 Hz  
 FT size 32768  
 Total time 12 hr, 42 min

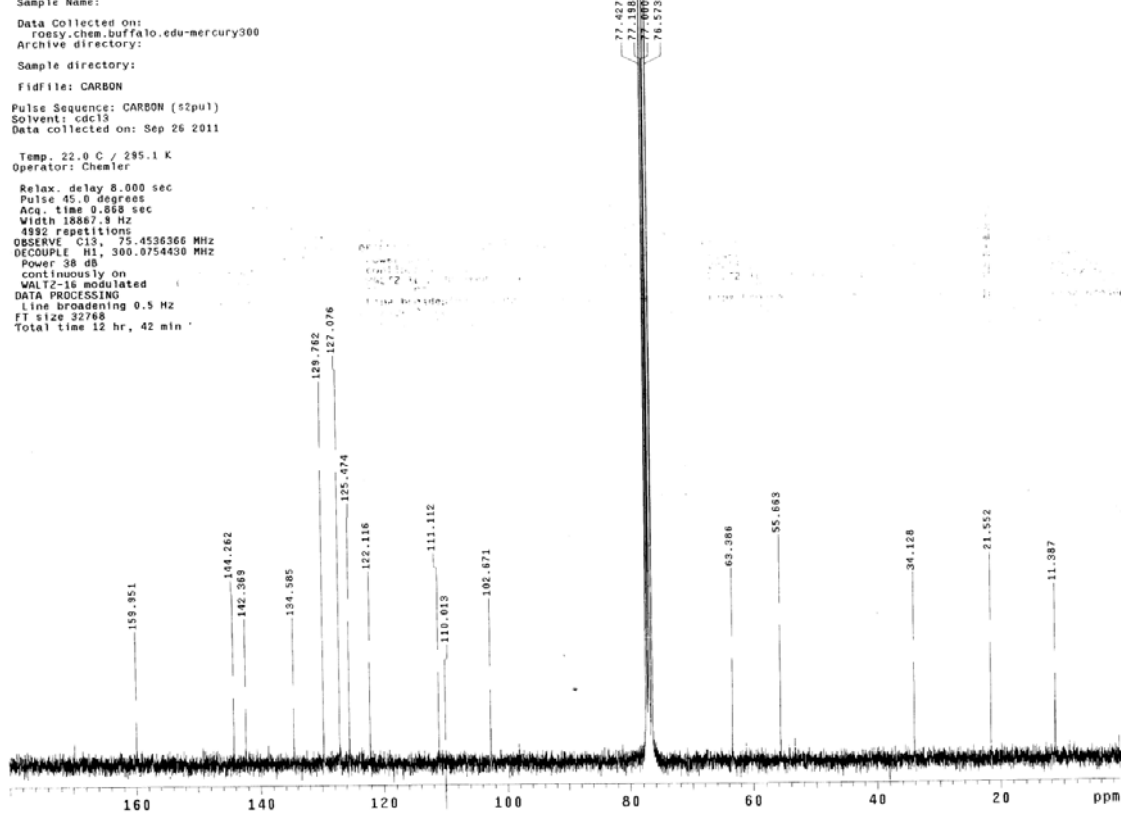

STANDARD PROTON PARAMETERS  
 Pulse Sequence: s2pul  
 Solvent: CDCl3  
 Ambient Temperature  
 INOVA-500 "foosy.chem.buffalo.edu"

Relax. delay 2.000 sec  
 Pulse 39.7 degrees  
 Acq. time 1.851 sec  
 Width 10000.0 Hz  
 16 repetitions  
 OBSERVE H1, 499.8984030 MHz  
 DATA PROCESSING  
 Line broadening 0.7 Hz  
 FT size 65536  
 Total time 1 min, 18 sec

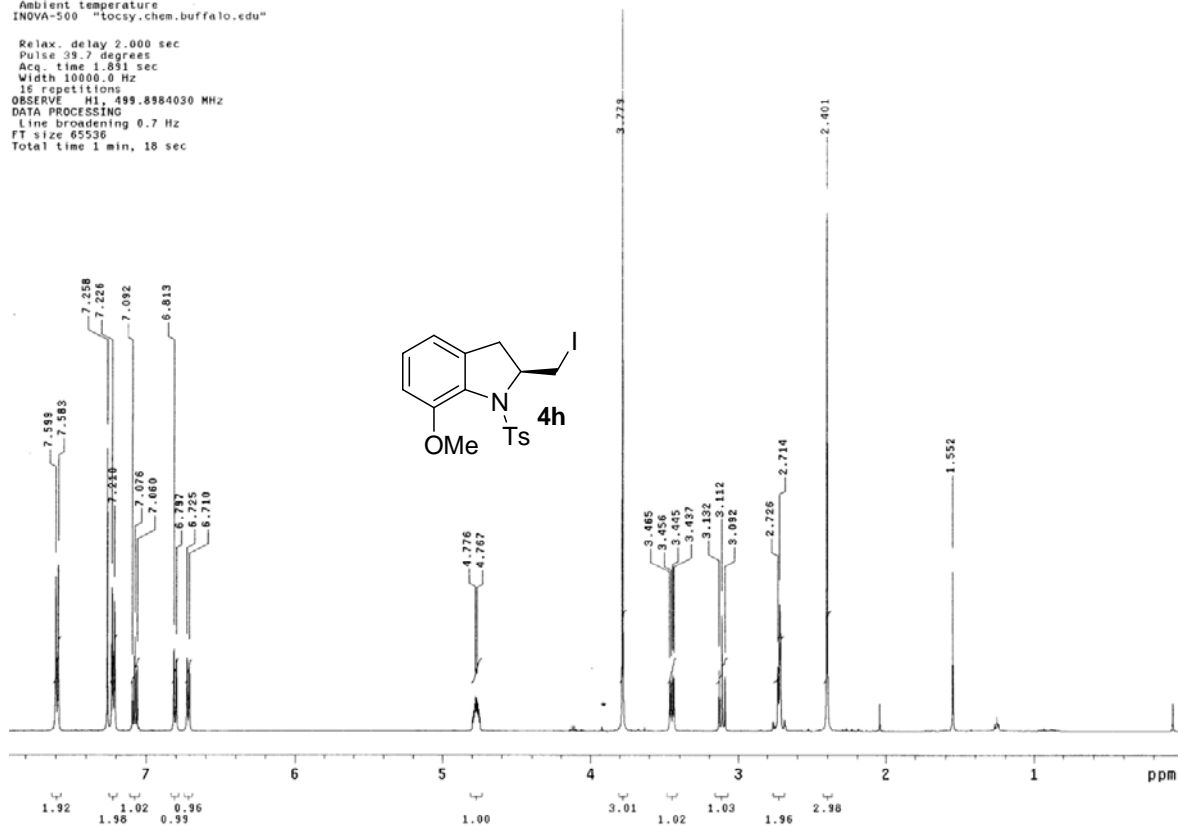

13C OBSERVE

Pulse Sequence: s2pul  
 Solvent: CDCl3  
 Ambient Temperature  
 GEMINI-300 "foosy.chem.buffalo.edu"

Relax. delay 5.000 sec  
 Pulse 90.0 degrees  
 Acq. time 1.706 sec  
 Width 18761.7 Hz  
 5744 repetitions  
 OBSERVE C13, 75.4536589 MHz  
 DECOUPLE H1, 300.0754431 MHz  
 Power 1023 dB  
 continuously on  
 WALTZ-16 modulated  
 DATA PROCESSING  
 Line broadening 1.0 Hz  
 FT size 65536  
 Total time 15 hr, 35 min, 46 sec

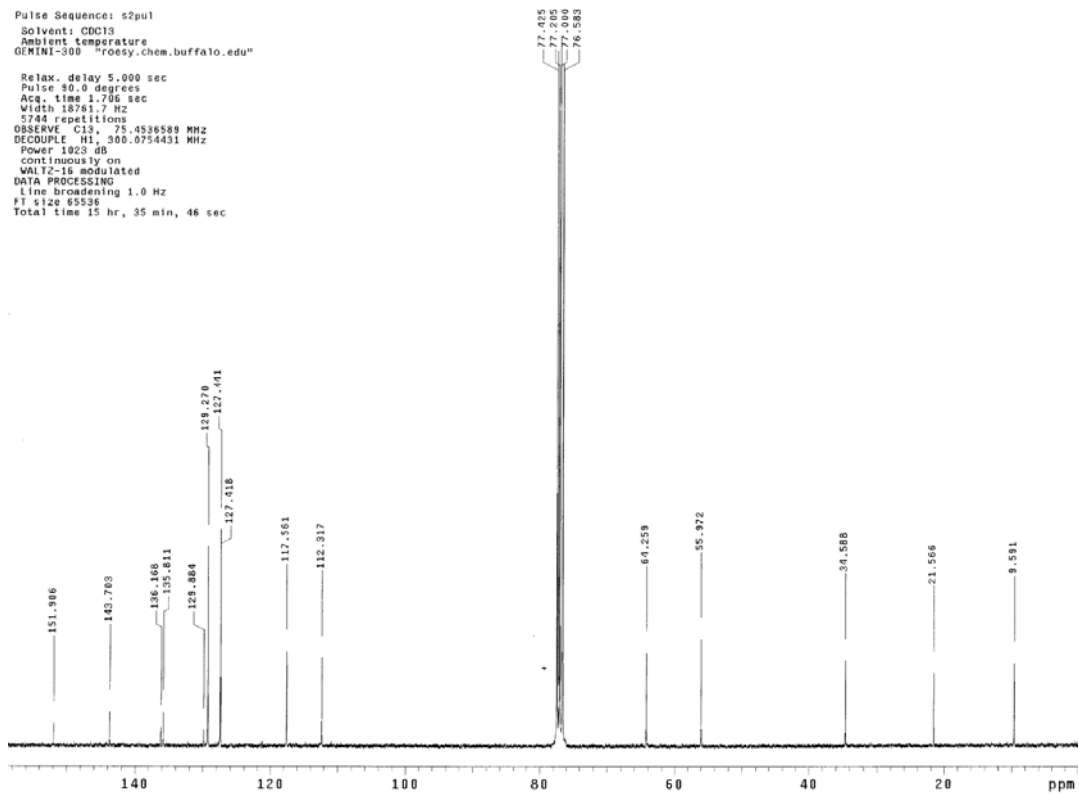



Sample Name:  
 Data Collected on:  
 chemmr400.chem.buffalo.edu-inova400  
 Archive directory:  
 Sample directory:  
 FidFile: MT8-1-32  
 Pulse Sequence: PROTON (s2pul)  
 Solvent: cdcl3  
 Data collected on: Dec 2 2011

Temp. 25.0 C / 298.1 K  
 Operator: Chemler  
 Relax. delay 2.000 sec  
 Pulse 45.0 degrees  
 Aca. time 2.585 sec  
 Width 6387.7 Hz  
 8 repetitions  
 OBSERVE H1, 399.9389027 MHz  
 DATA PROCESSING  
 FT size 32788  
 Total time 0 min 29 sec

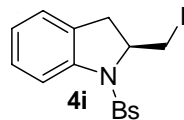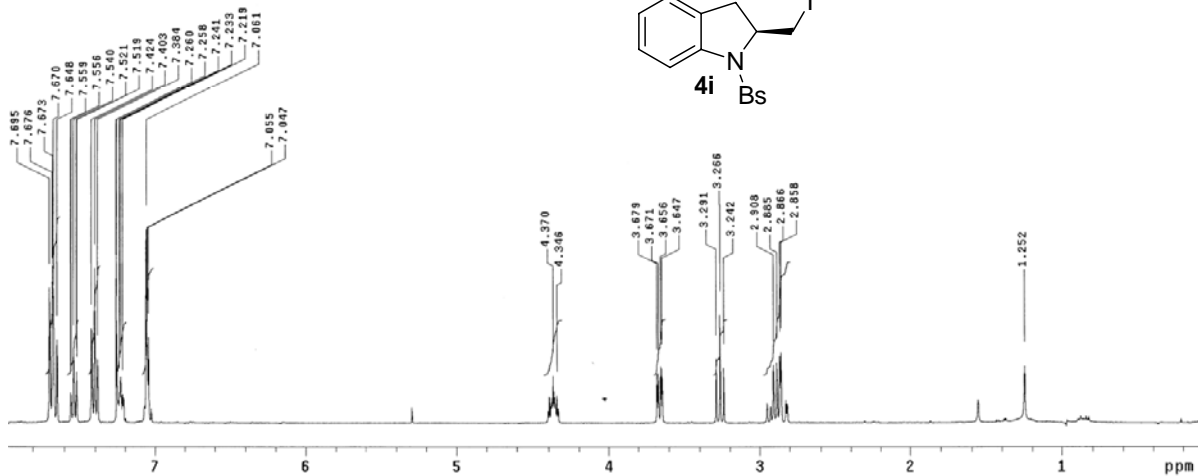

Sample Name:  
 Data Collected on:  
 roesy.chem.buffalo.edu-mercury300  
 Archive directory:  
 Sample directory:  
 FidFile: CARBON  
 Pulse Sequence: CARBON (s2pul)  
 Solvent: cdcl3  
 Data collected on: Jul 13 2010  
 Operator: Chemler  
 Relax. delay 8.000 sec  
 Pulse 45.0 degrees  
 Aca. time 0.966 sec  
 Width 13867.3 Hz  
 5120 repetitions  
 OBSERVE C13, 75.4536375 MHz  
 DECOUPLE H1, 300.0754430 MHz  
 Power 38 dB  
 continuously on  
 WALTZ-16 modulated  
 DATA PROCESSING  
 Line broadening 0.5 Hz  
 ft size 32788  
 Total time 12 hr, 42 min

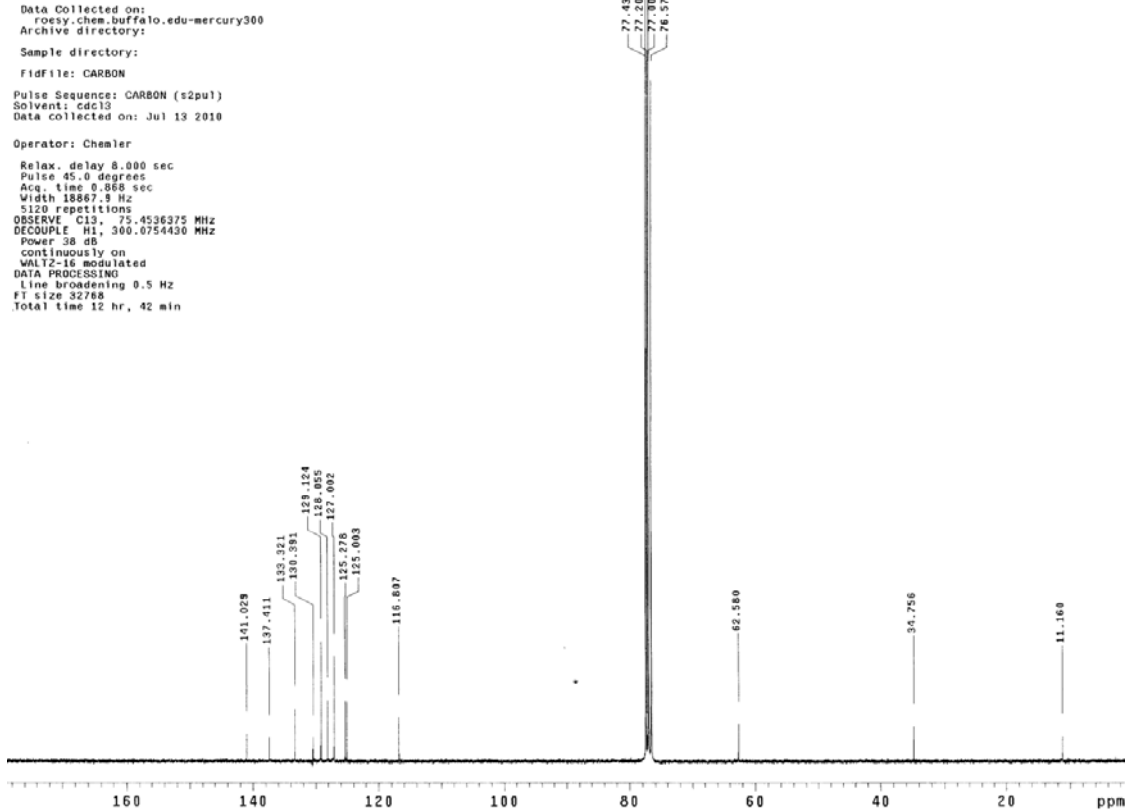

Sample Name:  
 Data Collected on:  
 chemmr400.chem.buffalo.edu-inova400  
 Archive directory:  
 Sample directory:  
 Fidfile: PROTON  
 Pulse Sequence: PROTON (s2pu1)  
 Solvent: cdc13  
 Data collected on: Aug 3 2010  
 Temp. 25.0 C / 298.15 K  
 Operator: Chemler  
 Relax. delay 2.00 sec  
 Pulse 45.0 degree  
 Acq. time 2.565 sec  
 Width 6527 Hz  
 16 repetitions  
 OBSERVE H1, 399.309023 MHz  
 DATA PROCESSING  
 FT size 32768  
 Total time 0 min 21 sec

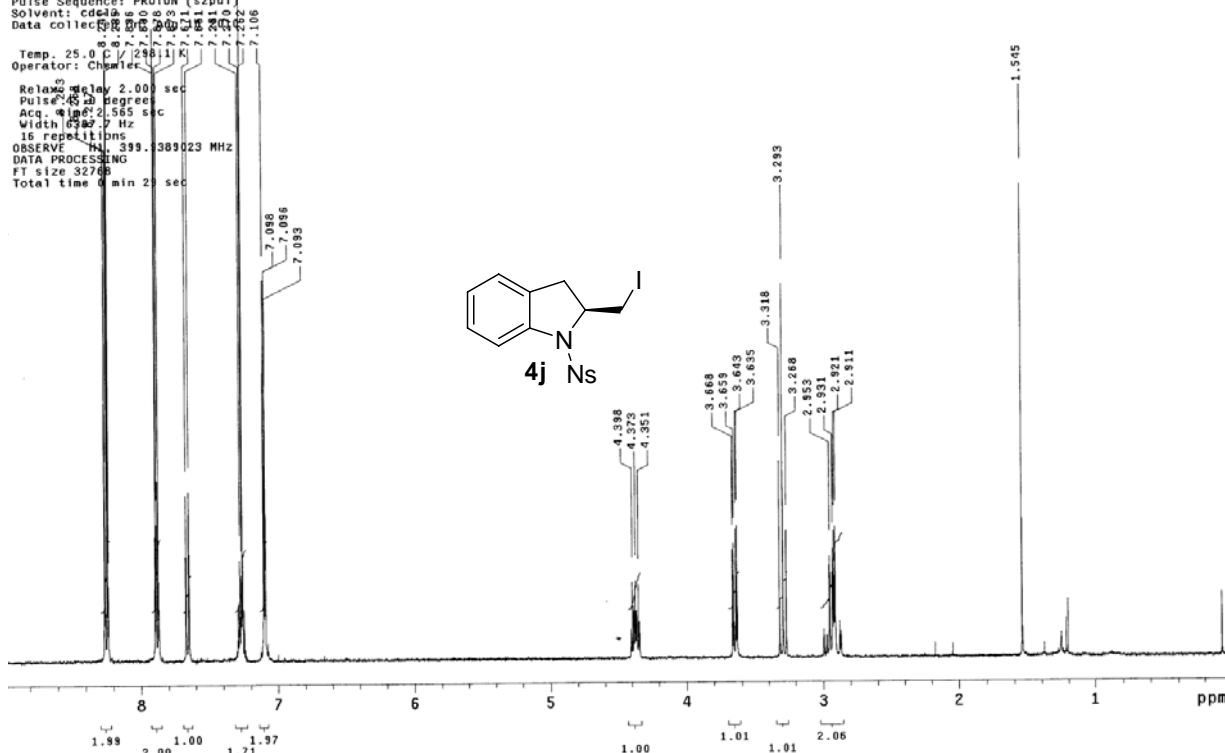

Sample Name:  
 Data Collected on:  
 roesy.chem.buffalo.edu-mercury300  
 Archive directory:  
 Sample directory:  
 Fidfile: CARBON  
 Pulse Sequence: CARBON (s2pu1)  
 Solvent: cdc13  
 Data collected on: Aug 3 2010  
 Operator: Chemler  
 Relax. delay 10.000 sec  
 Pulse 45.0 degrees  
 Acq. time 0.888 sec  
 Width 18867 Hz  
 4096 repetitions  
 OBSERVE C13, 75.4536375 MHz  
 DECOUPLE H1, 300.0754420 MHz  
 Power 38 dB  
 continuously on  
 WALTZ-16 modulated  
 DATA PROCESSING  
 Line broadening 0.5 Hz  
 FT size 32768  
 Total time 12 hr, 26 min

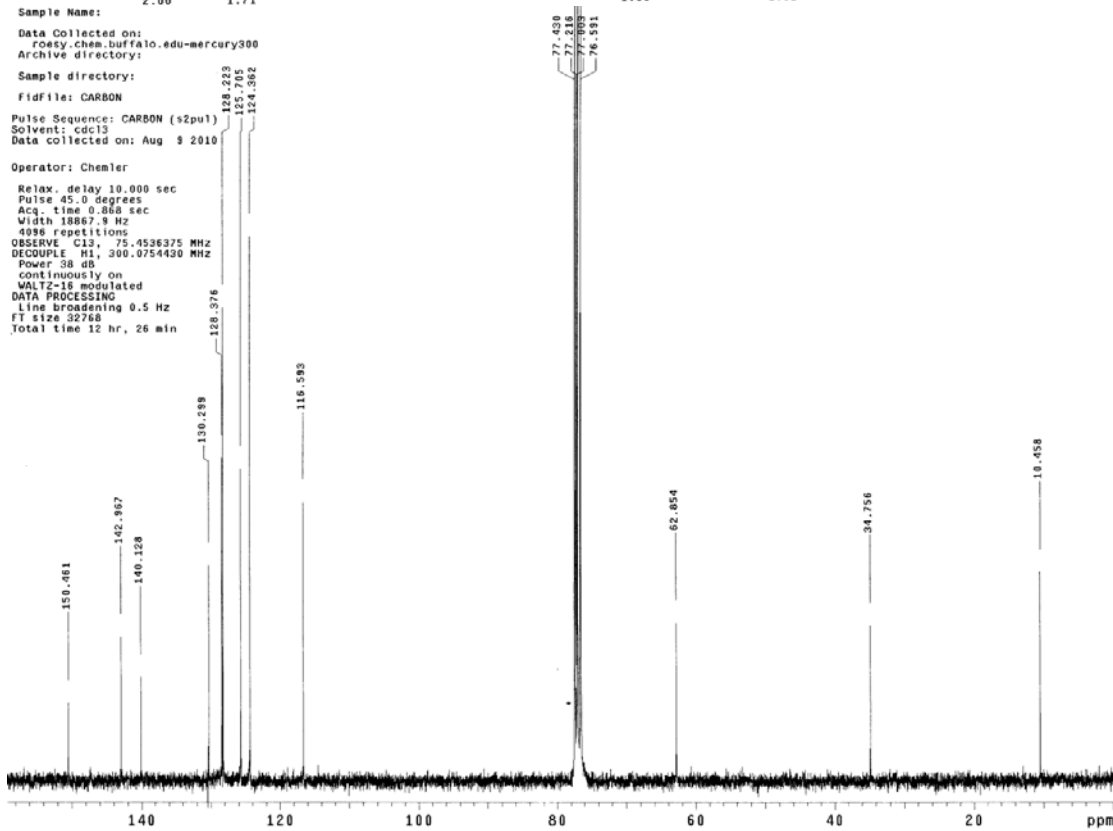

Sample Name:  
 Data Collected on:  
 chemmr400.chem.buffalo.edu-inova400  
 Archive directory:

Sample directory:  
 Fidfile: PROTON

Pulse Sequence: PROTON (s2pul)  
 Solvent: cdcl3  
 Data collected on: Jul 15 2010

Temp. 25.0 C / 298.1 K  
 Operator: Chemler

Relax. delay 2.000 sec  
 Pulse 45.0 degrees  
 Acq. time 2.585 sec  
 Width 6387.7 Hz  
 8 repetitions  
 OBSERVE H1, 399.9308929 MHz  
 DATA PROCESSING  
 FT size 32768  
 Total time 0 min 37 sec

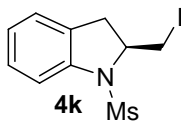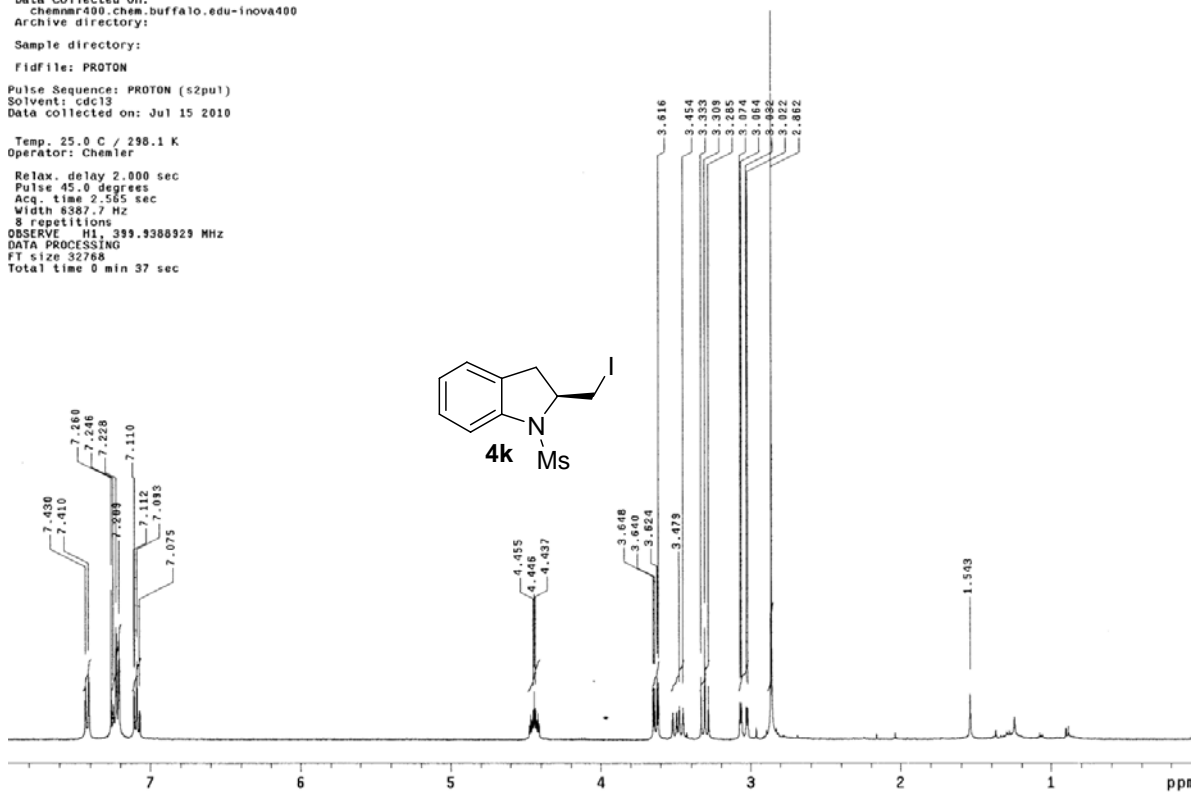

Sample Name:  
 Data Collected on:  
 roesy.chem.buffalo.edu-mercury300  
 Archive directory:

Sample directory:  
 Fidfile: CARBON

Pulse Sequence: CARBON (s2pul)  
 Solvent: cdcl3  
 Data collected on: Jul 14 2010

Operator: Chemler

Relax. delay 12.000 sec  
 Pulse 45.0 degrees  
 Acq. time 0.898 sec  
 Width 18867.9 Hz  
 3712 repetitions  
 OBSERVE C13, 75.4536377 MHz  
 DECOUPLE H1, 300.0754430 MHz  
 Power 38 dB  
 Continuously on  
 WALTZ-16 modulated  
 DATA PROCESSING  
 Line broadening 0.5 Hz  
 FT size 32768  
 Total time 14 hr, 42 min

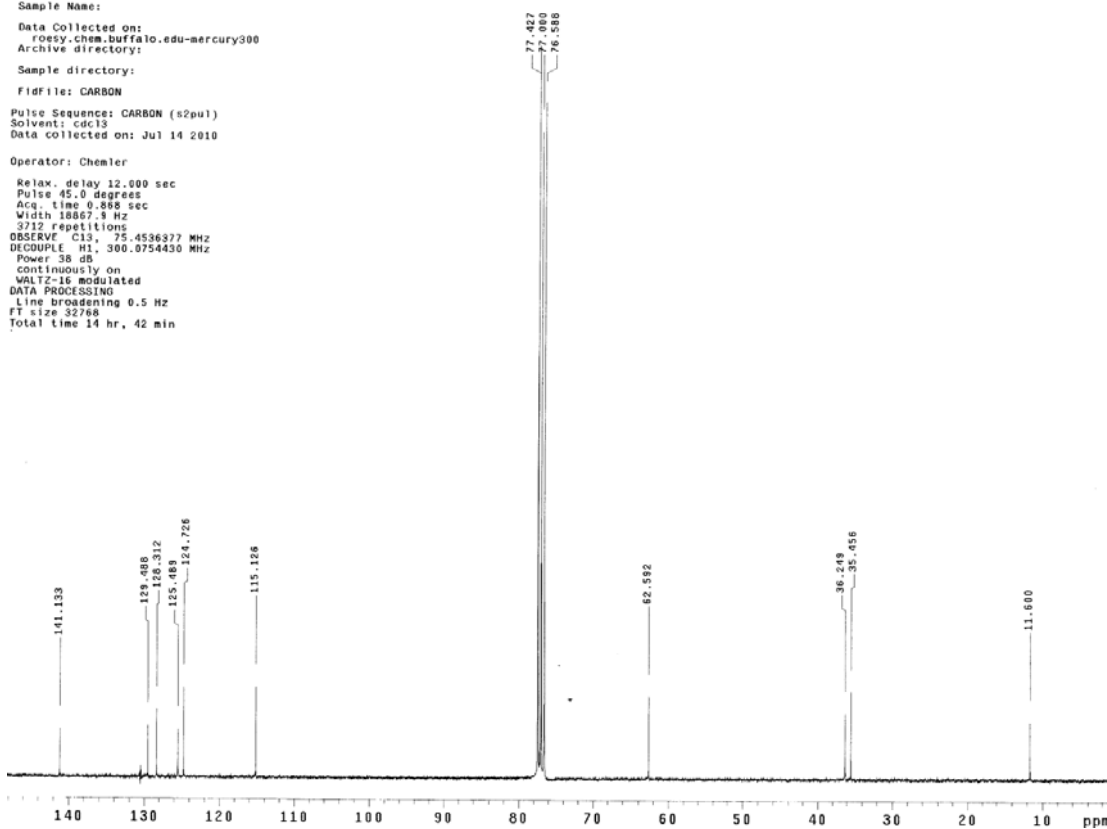

Sample Name:  
 Data Collected on:  
 chemmr400.chem.buffalo.edu-inova400  
 Archive directory:  
 Sample directory:  
 FidFile: MT8-1-66-pg255-f15-36-prep1  
 Pulse Sequence: PROTON (s2pu1)  
 Solvent: cdcl3  
 Data collected on: Nov 22 2010  
 Temp. 25.0 C / 298.1 K  
 Operator: Chemler  
 Relax. delay 2.000 sec  
 Pulse 45.0 degrees  
 Acq. time 2.565 sec  
 Width 6387.7 Hz  
 8 repetitions  
 OBSERVE H1, 399.9389027 MHz  
 DATA PROCESSING  
 FT size 32768  
 Total time 0 min 29 sec

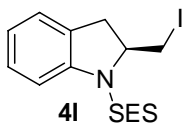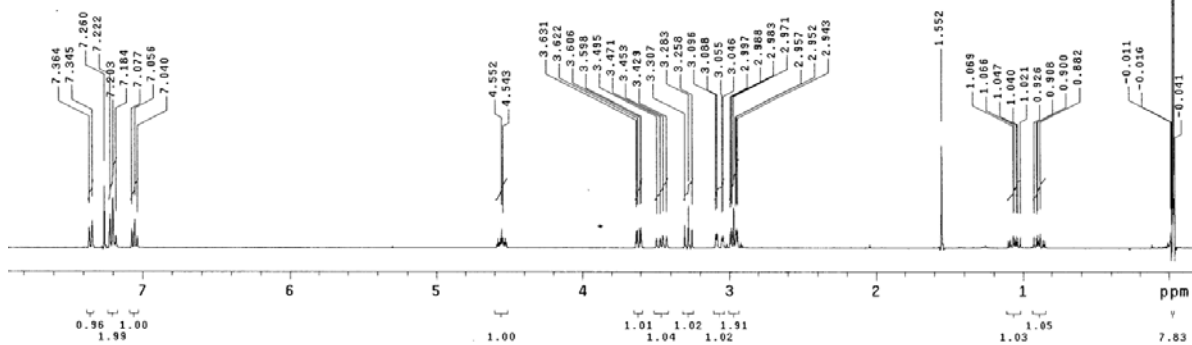

Sample Name:  
 Data Collected on:  
 roesy.chem.buffalo.edu-mercury300  
 Archive directory:  
 Sample directory:  
 Fidfile: CARBON  
 Pulse Sequence: CARBON (s2pu1)  
 Solvent: cdcl3  
 Data collected on: Apr 7 2011  
 Temp. 21.0 C / 294.1 K  
 Operator: Chemler  
 Relax. delay 10.000 sec  
 Pulse 45.0 degrees  
 Acq. time 0.868 sec  
 Width 18867.5 Hz  
 3804 repetitions  
 OBSERVE C13, 75.4536377 MHz  
 DECOUPLE H1, 300.0754430 MHz  
 Power 38 db  
 continuously on  
 WALTZ-16 modulated  
 DATA PROCESSING  
 Line broadening 0.5 Hz  
 FT size 32768  
 Total time 12 hr, 26 min

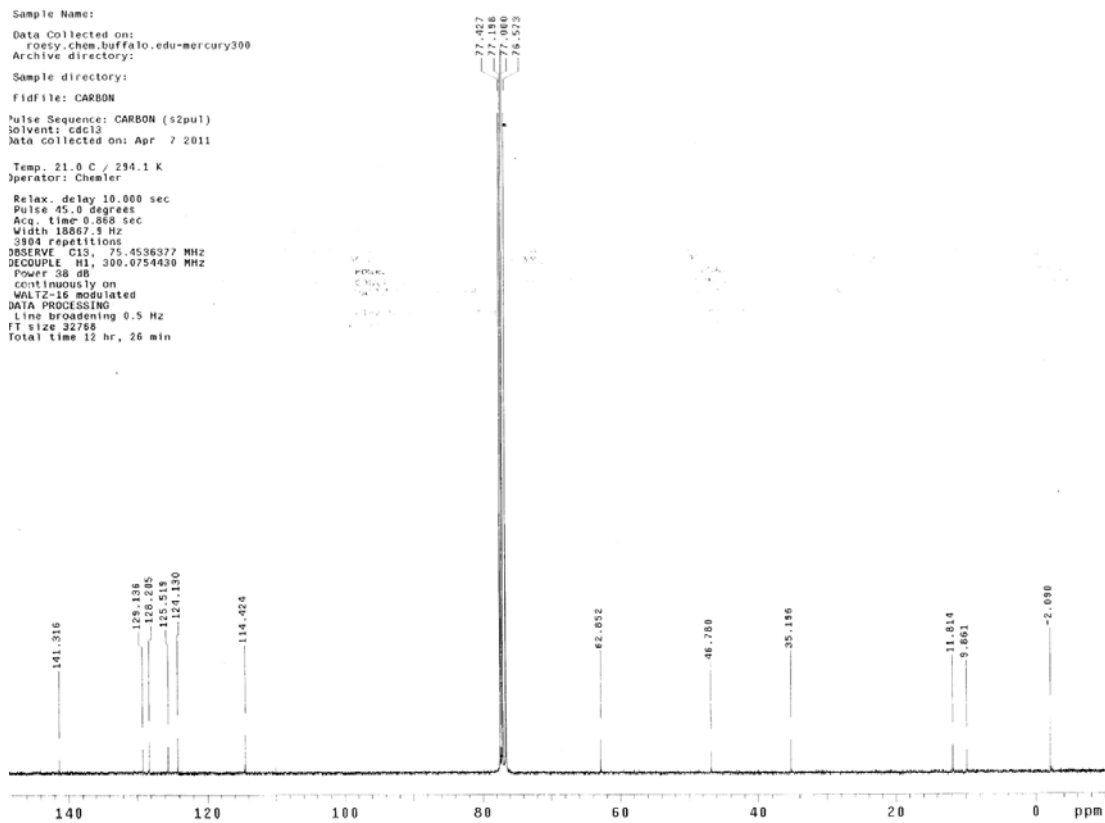

Sample Name:  
 Data Collected on:  
 chemm400.chem.buffalo.edu-inova400  
 Archive directory:  
 Sample directory:  
 FidFile: PROTON  
 Pulse Sequence: PROTON (s2pu1)  
 Solvent: cdc13  
 Data collected on: Sep 15 2011

Temp. 25.0 C / 298.1 K  
 Operator: Chemler  
 Relax. delay 2.000 sec  
 Pulse 45.0 degrees  
 Acq. time 2.565 sec  
 Width 6387.7 Hz  
 8 repetitions  
 OBSERVE H1, 399.9389026 MHz  
 DATA PROCESSING  
 FT size 32768  
 Total time 0 min 29 sec

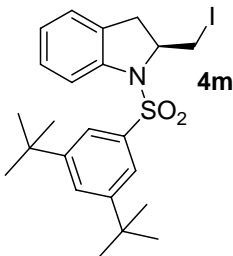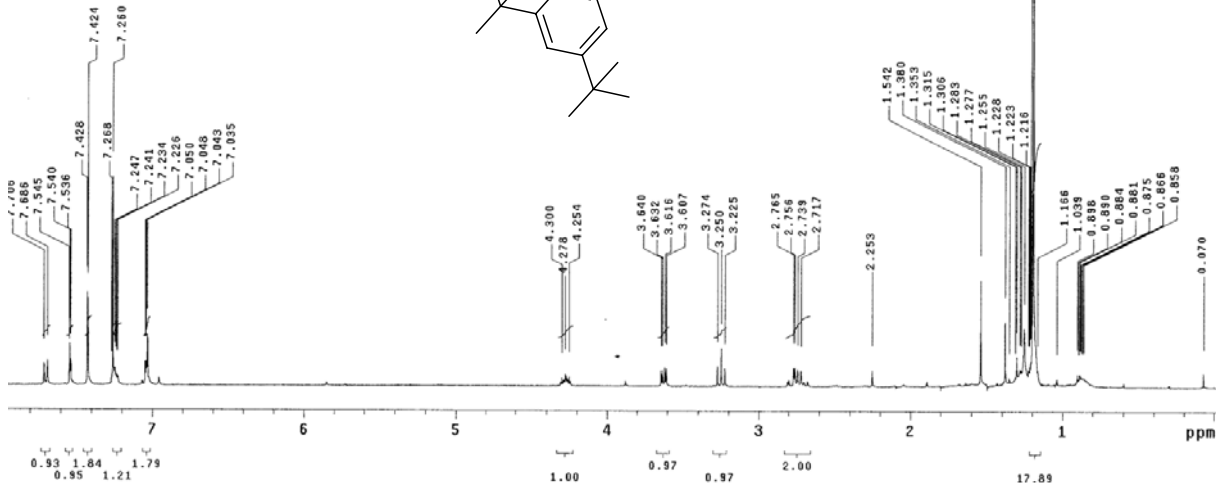

Sample Name:  
 Data Collected on:  
 roesy.chem.buffalo.edu-mercury300  
 Archive directory:  
 Sample directory:  
 FidFile: CARBON  
 Pulse Sequence: CARBON (s2pu1)  
 Solvent: cdc13  
 Data collected on: Sep 25 2011

Temp. 22.0 C / 295.1 K  
 Operator: Chemler  
 Relax. delay 8.000 sec  
 Pulse 45.0 degrees  
 Acq. time 0.868 sec  
 Width 18667.5 Hz  
 4608 repetitions  
 OBSERVE C13, 75.4536375 MHz  
 DECOUPLE H1, 300.0754430 MHz  
 Power 38 dB  
 continuously on  
 WALTZ-16 modulated  
 DATA PROCESSING  
 Line broadening 0.5 Hz  
 FT size 32768  
 Total time 11 hr, 26 min

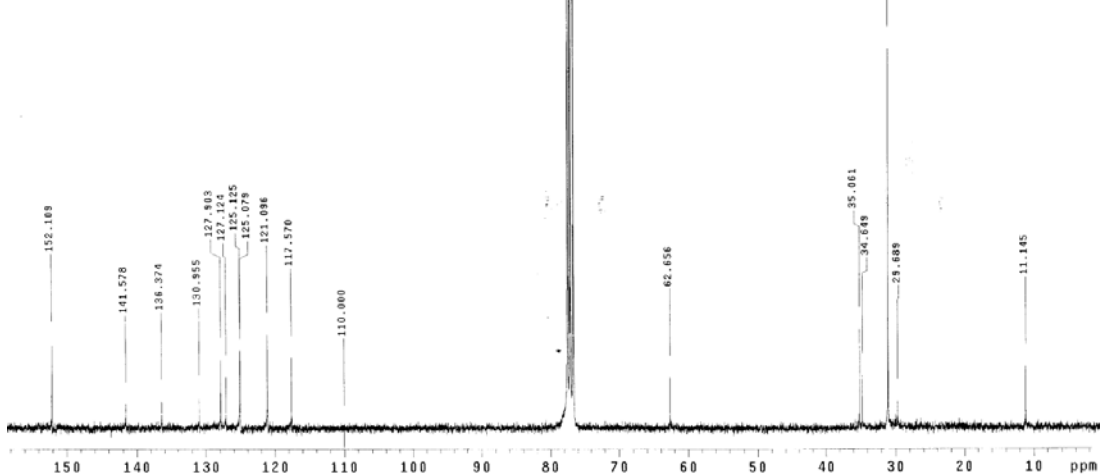

Sample Name:  
 Data Collected on:  
 Chemarr400.Chem.buffalo.edu-inova400  
 Archive directory:  
 Sample directory:  
 Fidfile: PROTON  
 Pulse Sequence: PROTON (s2pul)  
 Solvent: cdc13  
 Data collected on: Dec 2 2011  
 Temp. 25.0 C / 298.1 K  
 Operator: Chemler  
 Relax. delay 1.000 sec  
 Pulse 45.0 degrees  
 Acq. time 2.565 sec  
 Width 6387.7 Hz  
 8 repetitions  
 OBSERVE H1, 399.9389027 MHz  
 DATA PROCESSING  
 FT size 32768  
 Total time 0 min 29 sec

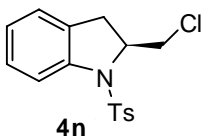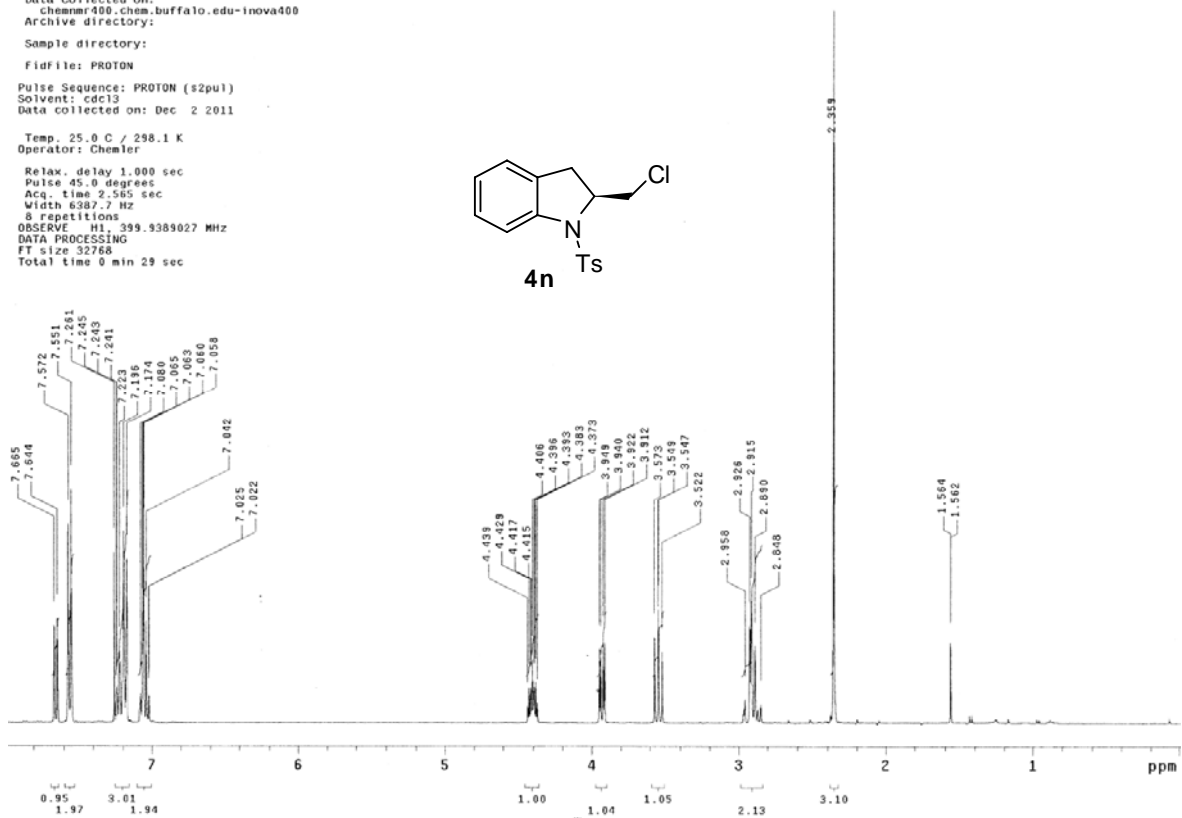

STANDARD CARBON PARAMETERS

Sample Name:  
 Data Collected on:  
 roesy.chem.buffalo.edu-mercury300  
 Archive directory:  
 Sample directory:  
 Fidfile: CARBON  
 Pulse Sequence: CARBON (s2pul)  
 Solvent: cdc13  
 Data collected on: Dec 14 2011  
 Temp. 25.0 C / 298.1 K  
 Operator: Sherry  
 Relax. delay 8.000 sec  
 Pulse 45.0 degrees  
 Acq. time 0.868 sec  
 Width 18867.3 Hz  
 4800 repetitions  
 OBSERVE C13, 75.4536375 MHz  
 DECOUPLE H1, 300.0754430 MHz  
 Power 28 dB  
 continuously on  
 WALTZ-16 modulated  
 DATA PROCESSING  
 Line broadening 0.5 Hz  
 FT size 32768  
 Total time 11 hr, 26 min

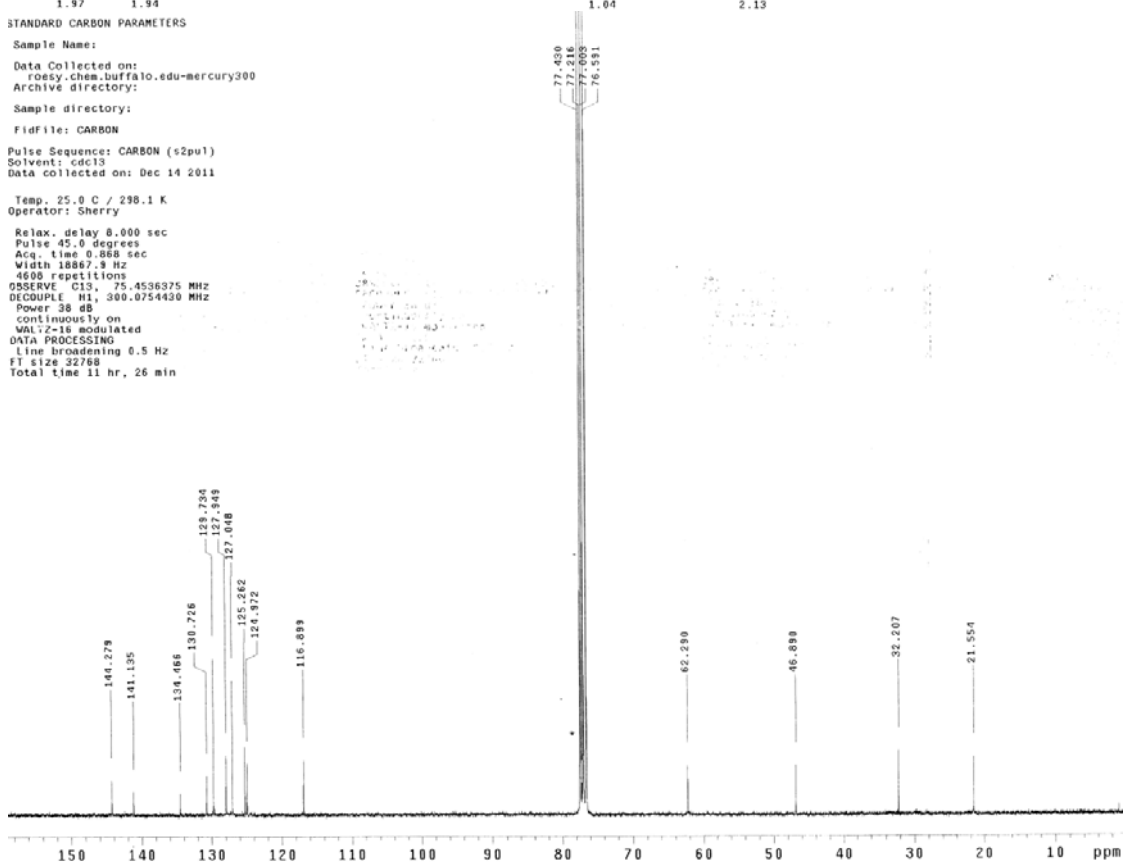

Sample Name:  
 Data Collected on:  
 chemnar400.chem.buffalo.edu-inova400  
 Archive directory:  
 Sample directory:  
 FidFile: PROTON  
 Pulse Sequence: PROTON (s2pu1)  
 Solvent: cdc13  
 Data collected on: Dec 16 2011

Temp. 25.0 C / 298.1 K  
 Operator: Chemler  
 Relax. delay 2.000 sec  
 Pulse 45.0 degrees  
 Acq. time 2.565 sec  
 Width 6387.7 Hz  
 8 repetitions  
 OBSERVE H1, 399.9369015 MHz  
 DATA PROCESSING  
 FT size 32768  
 Total time 0 min 29 sec

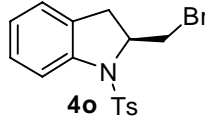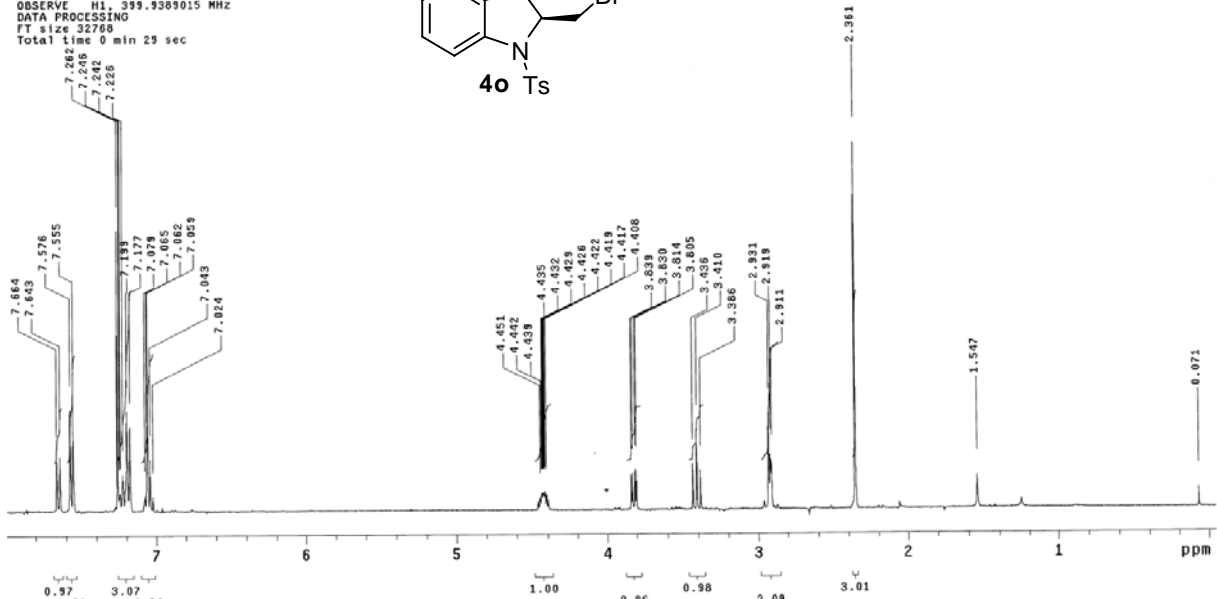

Sample Name:  
 Data Collected on:  
 roesy.chem.buffalo.edu-mercury300  
 Archive directory:  
 Sample directory:  
 FidFile: CARBON  
 Pulse Sequence: CARBON (s2pu1)  
 Solvent: cdc13  
 Data collected on: Dec 16 2011

Temp. 25.0 C / 298.1 K  
 Operator: Sherry  
 Relax. delay 8.000 sec  
 Pulse 45.0 degrees  
 Acq. time 0.866 sec  
 Width 18867.3 Hz  
 4828 repetitions  
 OBSERVE C13, 75.4536375 MHz  
 DECOUPLE H1, 300.0754430 MHz  
 Power 38 dB  
 continuously on  
 WALTZ-16 modulated  
 DATA PROCESSING  
 Line broadening 0.5 Hz  
 FT size 32768  
 Total time 12 hr, 13 min

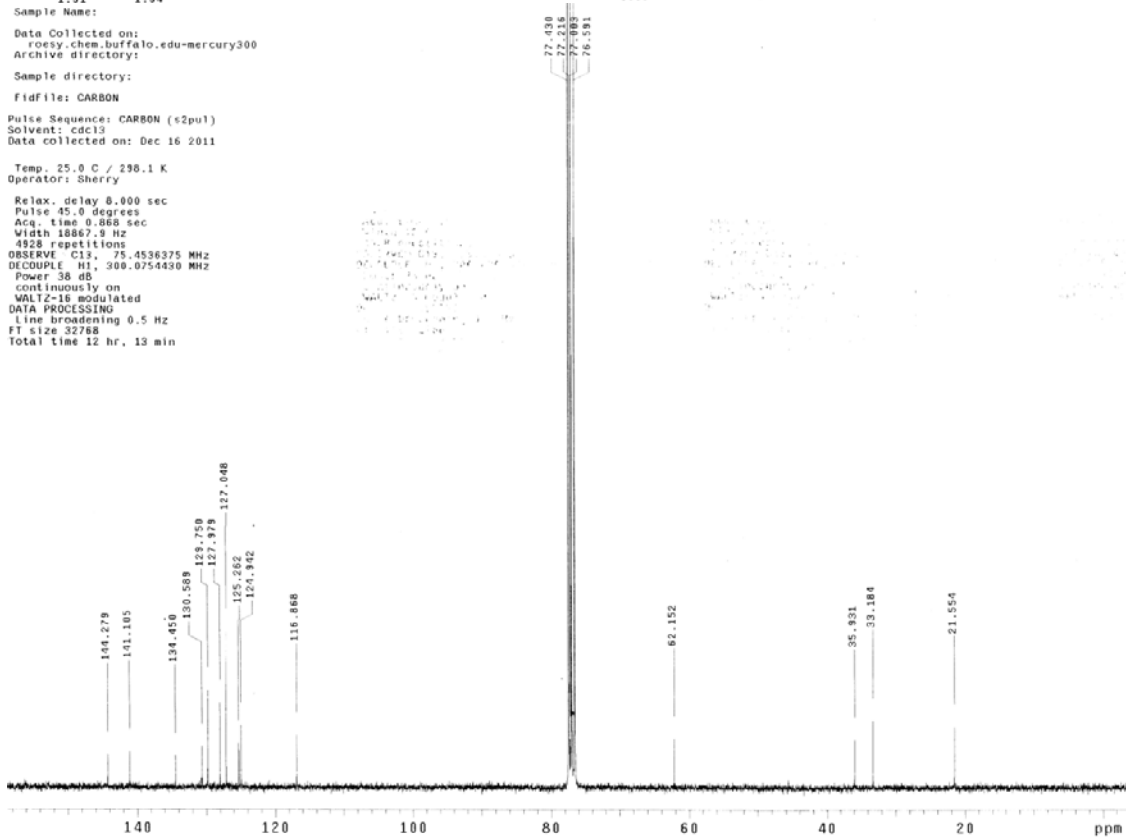

Sample Name:  
 Data Collected on:  
 Chemm400, chem.buffalo.edu-inova400  
 Archive directory:  
 Sample directory:  
 FidFile: PROTON  
 Pulse Sequence: PROTON (s2pul)  
 Solvent: cdcl3  
 Data collected on: Sep 16 2011  
 Temp: 25.0 C / 298.1 K  
 Operator: Chemler  
 Relax. delay 2.000 sec  
 Pulse 45.0 degrees  
 Acq. time 2.565 sec  
 Width 6387.7 Hz  
 8 repetitions  
 OBSERVE H1, 399.9389022 MHz  
 DATA PROCESSING  
 FT size 32768  
 Total time 0 min 29 sec

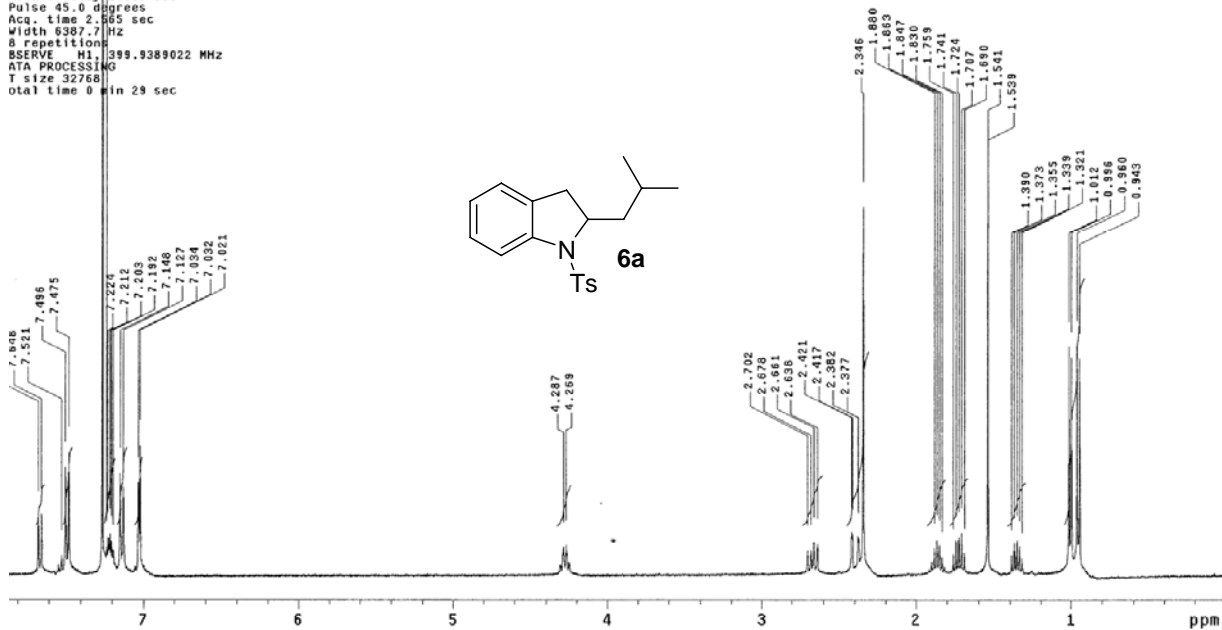

1.03 1.671.71  
 1.93 1.93  
 1.00  
 1.24 4.27 1.14 1.17 1.05 6.06  
 ppm

STANDARD CARBON PARAMETERS

Sample Name:  
 Data Collected on:  
 rosey, chem.buffalo.edu-mercury300  
 Archive directory:  
 Sample directory:  
 FidFile: CARBON  
 Pulse Sequence: CARBON (s2pul)  
 Solvent: cdcl3  
 Data collected on: Sep 27 2011  
 Temp: 22.0 C / 295.1 K  
 Operator: Chemler  
 Relax. delay 8.000 sec  
 Pulse 45.0 degrees  
 Acq. time 0.868 sec  
 Width 18867.9 Hz  
 4000 repetitions  
 OBSERVE C13, 75.4536366 MHz  
 DECOUPLE H1, 300.0754430 MHz  
 Power 38 dB  
 continuously on  
 WALTZ-16 modulated  
 DATA PROCESSING  
 Line broadening 0.5 Hz  
 FT size 32768  
 Total time 11 hr, 26 min

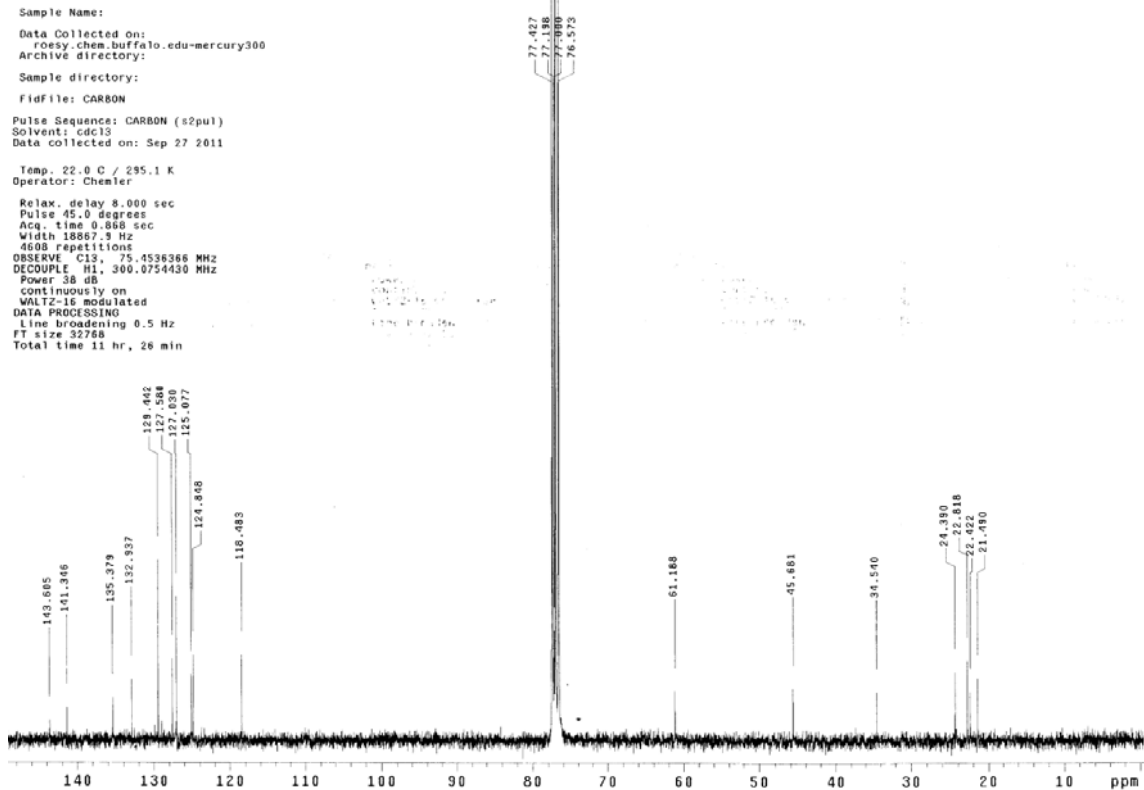



Sample Name:  
 Data Collected on:  
 Chemmr400.chem.buffalo.edu-inova400  
 Archive directory:  
 Sample directory:  
 Fidfile: tw1-1-239pure  
 Pulse Sequence: PROTON (s2pu1)  
 Solvent: cdcl3  
 Data collected on: Apr 13 2011

Temp. 25.0 C / 298.1 K  
 Operator: Chemler  
 Relax. delay 2.000 sec  
 Pulse 45.0 degrees  
 Acq. time 2.565 sec  
 Width 6387.7 Hz  
 8 repetitions  
 OBSERVE H1, 399.9389017 MHz  
 DATA PROCESSING  
 FT size 32768  
 Total time 0 min 29 sec

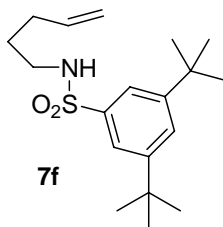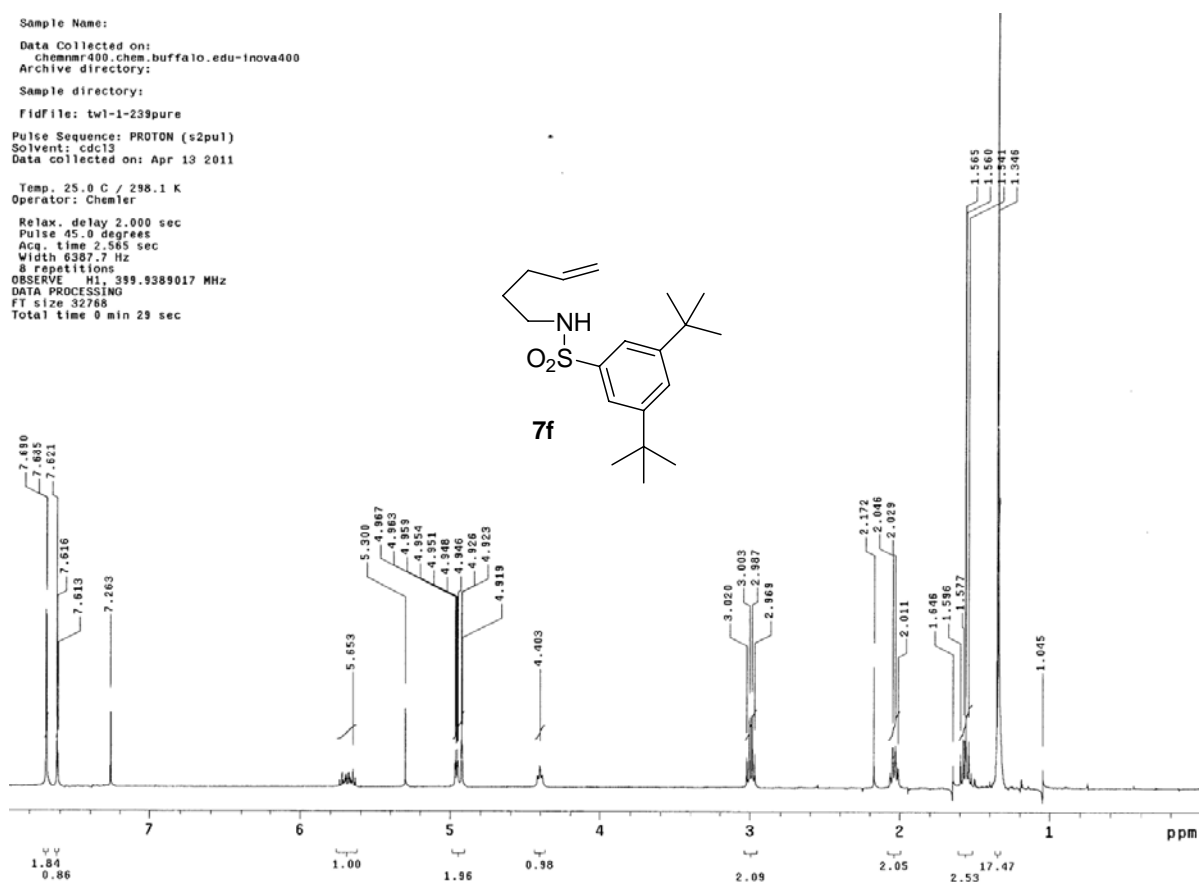

Sample Name:  
 Data Collected on:  
 roesy.chem.buffalo.edu-mercury300  
 Archive directory:  
 Sample directory:  
 Fidfile: tw1-1-239carbon  
 Pulse Sequence: CARBON (s2pu1)  
 Solvent: d2o  
 Data collected on: Apr 22 2011

Temp. 21.0 C / 294.1 K  
 Operator: Chemler  
 Relax. delay 1.800 sec  
 Pulse 45.0 degrees  
 Acq. time 0.868 sec  
 Width 18867.3 Hz  
 782 repetitions  
 OBSERVE C13, 75.4536405 MHz  
 DECOUPLE H1, 309.0762142 MHz  
 Power 38 dB  
 Continuously on  
 WALTZ-16 modulated  
 DATA PROCESSING  
 Line broadening 0.5 Hz  
 FT size 32768  
 Total time 1 hr, 14 min

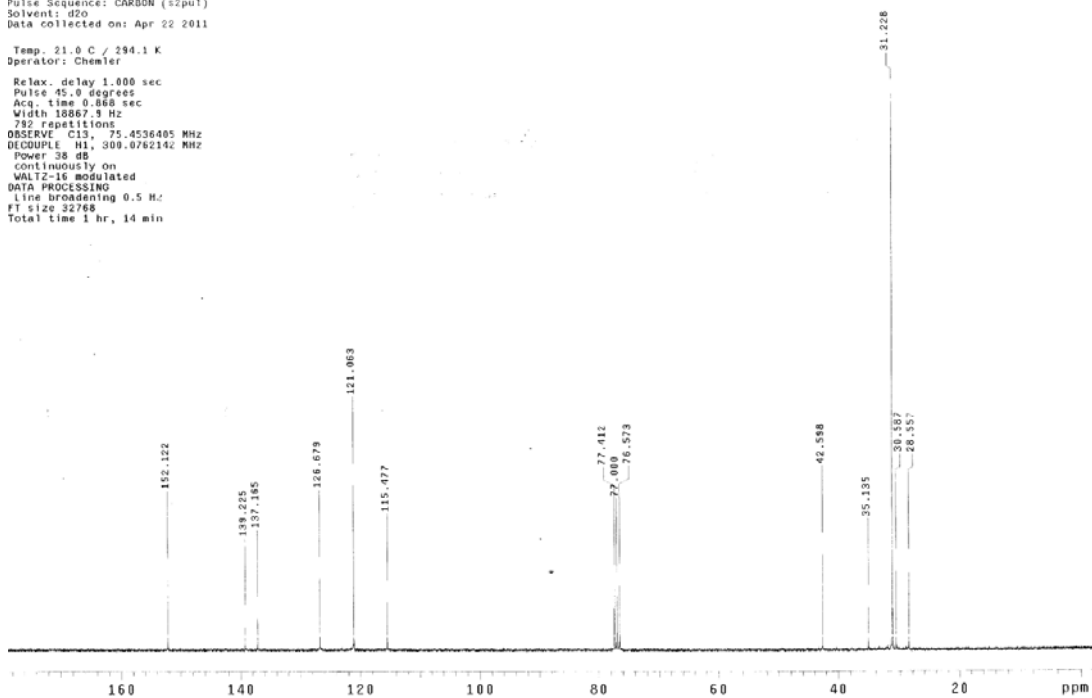

STANDARD 1H OBSERVE

Pulse Sequence: s2pu1  
 Solvent: CDCl3  
 Ambient temperature  
 INOVA-400 "Cosy,chem.buffalo.edu"

Relax. delay 1.000 sec  
 Pulse 47.9 degrees  
 Acq. time 1.800 sec  
 Width 6000.6 Hz  
 16 repetitions  
 OBSERVE H1, 399.9369099 MHz  
 DATA PROCESSING  
 Line broadening 0.9 Hz  
 FT size 32768  
 Total time 0 min, 44 sec

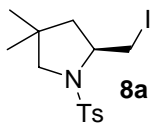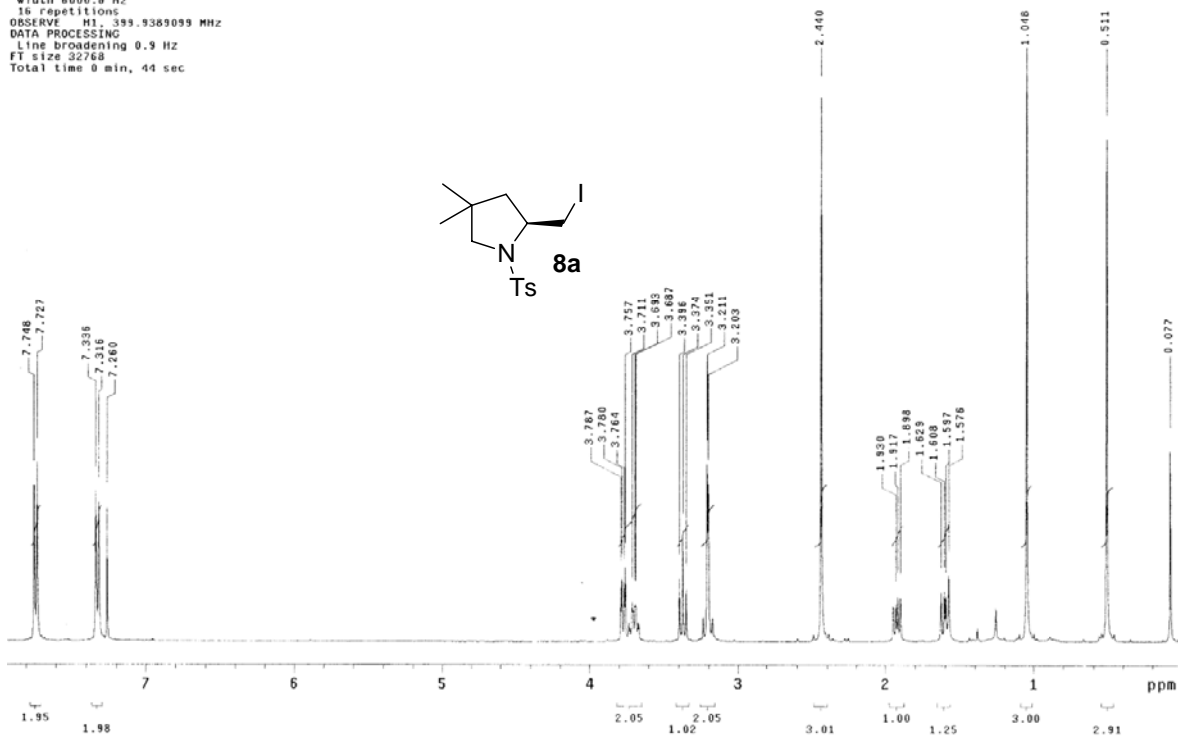

13C OBSERVE

Pulse Sequence: s2pu1  
 Solvent: CDCl3  
 Ambient temperature  
 GEMINI-300 "roesy,chem.buffalo.edu"

Relax. delay 8.000 sec  
 Pulse 90.0 degrees  
 Acq. time 1.706 sec  
 Width 18761.7 Hz  
 3852 repetitions  
 OBSERVE C13, 75.4536612 MHz  
 DECOUPLE H1, 300.0754431 MHz  
 Power 1023 dB  
 continuously on  
 WALTZ-16 modulated  
 DATA PROCESSING  
 Line broadening 1.0 Hz  
 FT size 65536  
 Total time 11 hr, 22 min, 40 sec

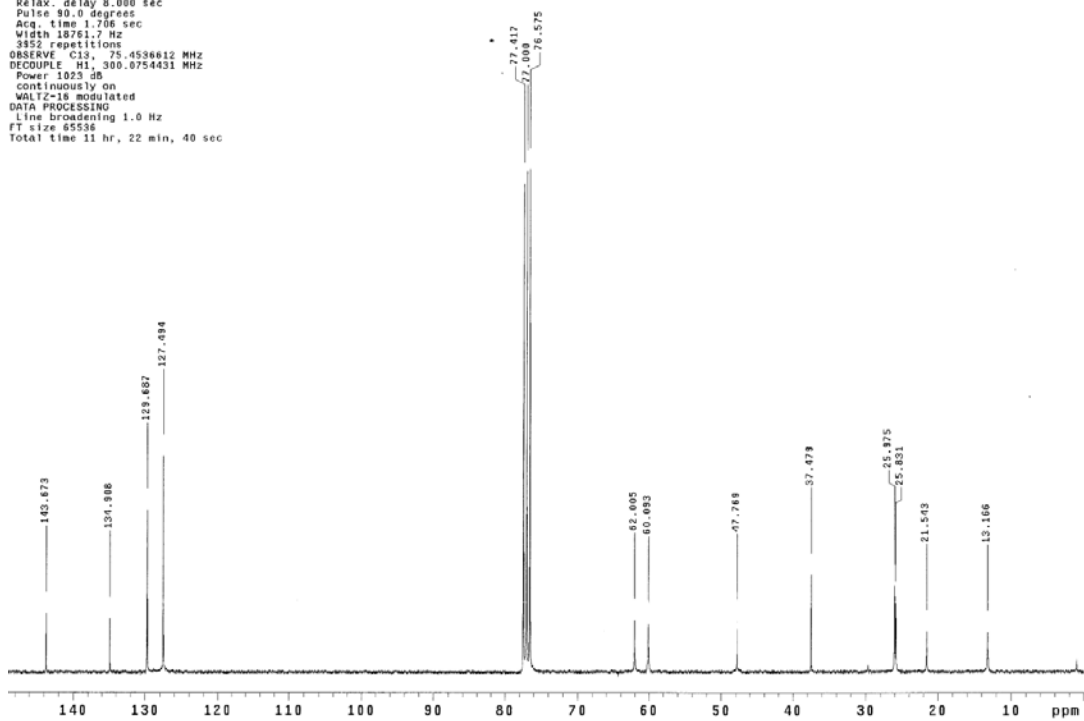

STANDARD 1H OBSERVE

Pulse Sequence: s2pul  
 Solvent: CDCl3  
 Ambient temperature  
 INOVA-400 "cosy.chem.buffalo.edu"  
 Relax. delay 1.000 sec  
 Pulse 52.3 degrees  
 Acq. time 1.800 sec  
 Width 6000.6 Hz  
 16 repetitions  
 OBSERVE H1, 399.9389029 MHz  
 DATA PROCESSING  
 Line broadening 0.9 Hz  
 FT size 32768  
 Total time 0 min, 44 sec

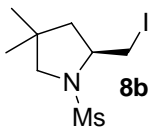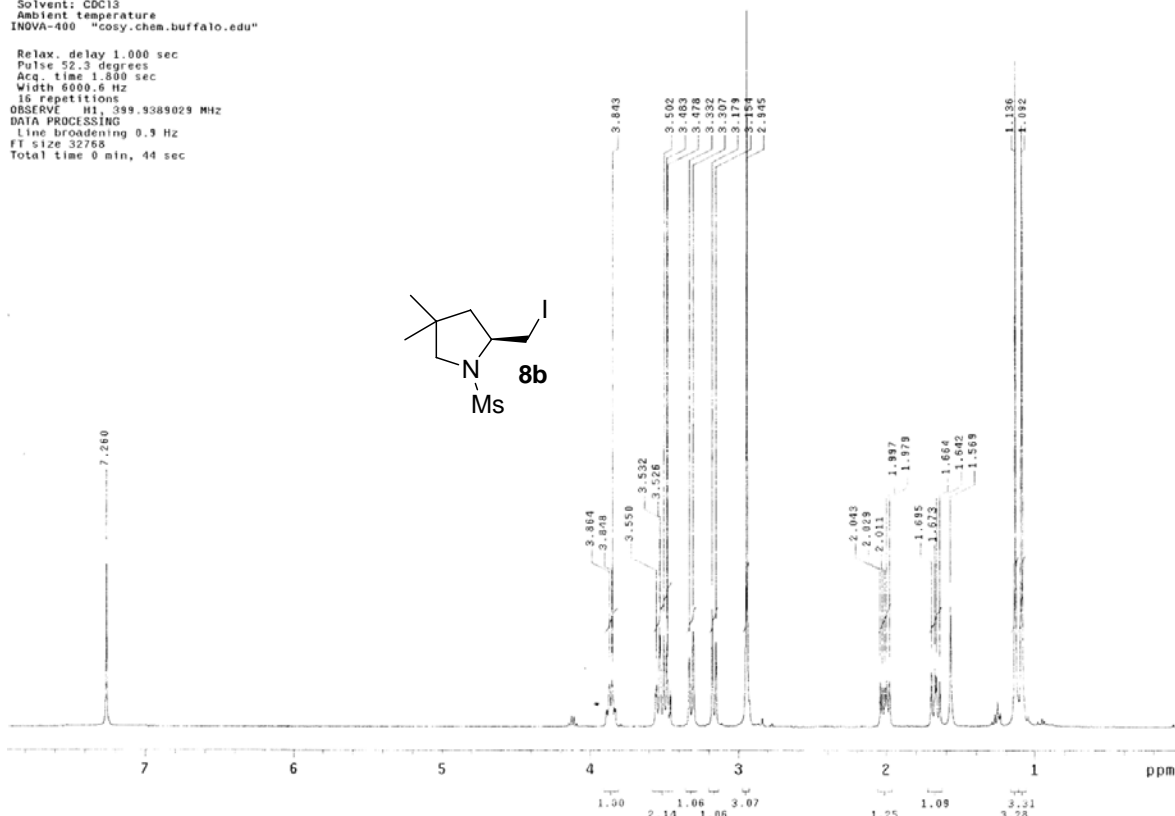

Sample Name:  
 Data Collected on:  
 roesy.chem.buffalo.edu-mercury300  
 Archive directory:  
 Sample directory:  
 Fidfile: CARBON  
 Pulse Sequence: CARBON (s2pul)  
 Solvent: cdcl3  
 Data collected on: Aug 25 2010  
 Operator: Chemler  
 Relax. delay 10.000 sec  
 Pulse 45.0 degrees  
 Acq. time 0.888 sec  
 Width 18867.3 Hz  
 3848 repetitions  
 OBSERVE C13, 75.4536375 MHz  
 DECOUPLE H1, 300.0754450 MHz  
 Power 08 dB  
 continuously on  
 WALTZ-16 modulated  
 DATA PROCESSING  
 Line broadening 0.5 Hz  
 FT size 32768  
 Total time 12 hr, 26 min

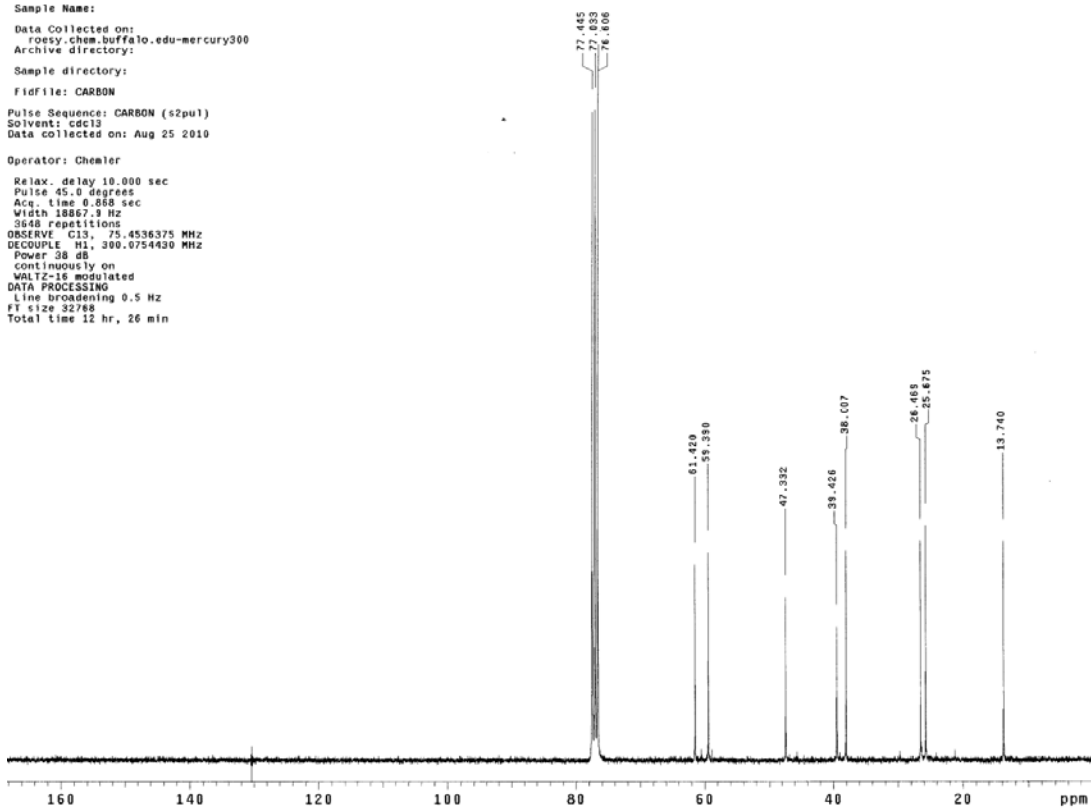

Sample Name:  
 Data Collected on:  
 chemmr400.chem.buffalo.edu-inova400  
 Archive directory:  
 Sample directory:  
 Fidfile: PROTON  
 Pulse Sequence: PROTON (s2pu1)  
 Solvent: cdcl3  
 Data collected on: Aug 13 2010  
 Temp. 25.0 C / 298.1 K  
 Operator: Chemler  
 Relax. delay 1.000 sec  
 Pulse 45.0 degrees  
 Acq. time 2.565 sec  
 Width 6387.7 Hz  
 8 repetitions  
 OBSERVE H1, 399.9389035 MHz  
 DATA PROCESSING  
 FT size 32768  
 Total time 0 min 29 sec

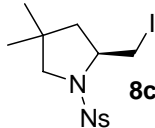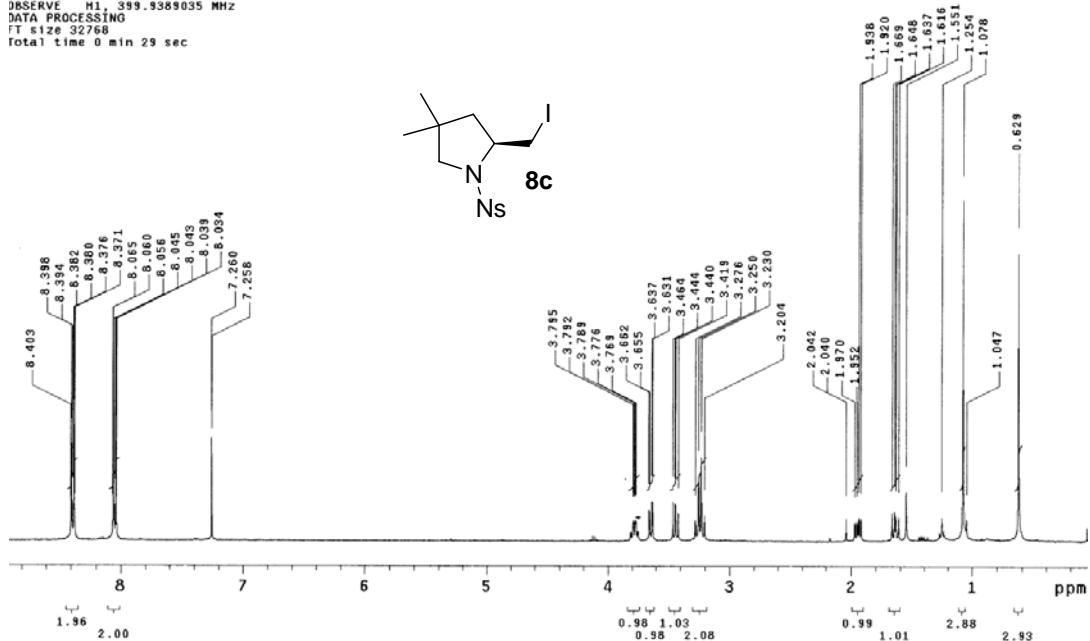

Sample Name:  
 Data Collected on:  
 roesy.chem.buffalo.edu-mercury300  
 Archive directory:  
 Sample directory:  
 Fidfile: CARBON  
 Pulse Sequence: CARBON (s2pu1)  
 Solvent: cdcl3  
 Data collected on: Aug 12 2010  
 Operator: Chemler  
 Relax. delay 10.000 sec  
 Pulse 45.0 degrees  
 Acq. time 0.868 sec  
 Width 13867.9 Hz  
 3458 repetitions  
 OBSERVE C13, 75.4536375 MHz  
 DECOUPLE H1, 399.0754430 MHz  
 Power 38 dB  
 continuously on  
 WALTZ-16 modulated  
 DATA PROCESSING  
 Line broadening 0.5 Hz  
 FT size 32768  
 Total time 12 hr, 26 min

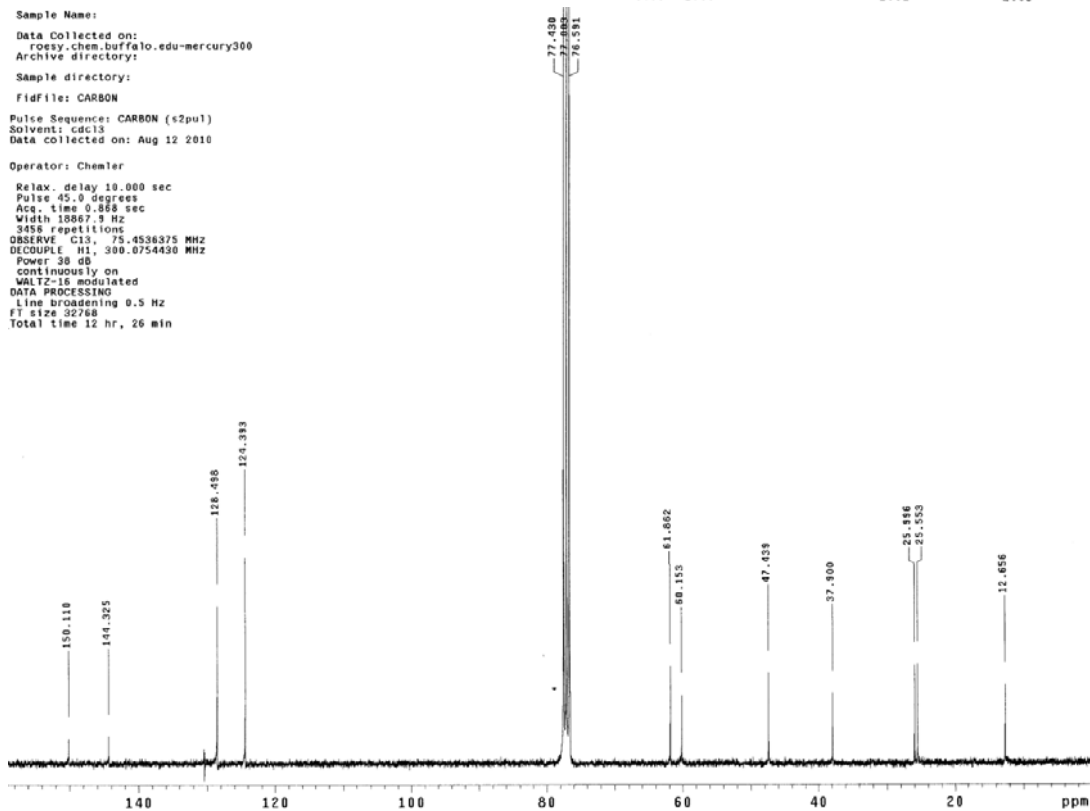

STANDARD PROTON PARAMETERS  
 Pulse Sequence: s2pu1  
 Solvent: CDCl3  
 Ambient temperature  
 INOVA-500 "tocsy.chem.buffalo.edu"

Relax. delay 2.000 sec  
 Pulse 33.7 degrees  
 Acq. time 1.891 sec  
 Width 10000.0 Hz  
 16 repetitions  
 OBSERVE H1, 499.8384024 MHz  
 DATA PROCESSING  
 Line broadening 0.7 Hz  
 FT size 65536  
 Total time 11 min, 18 sec

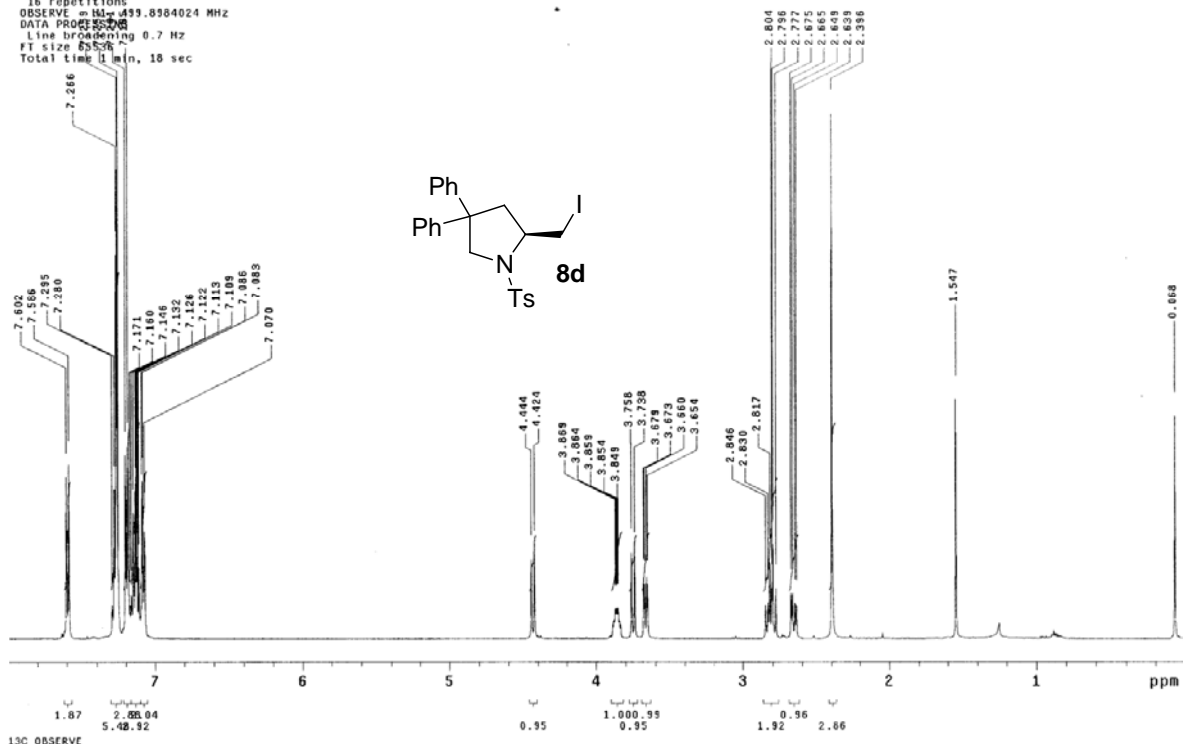

13C OBSERVE

Pulse Sequence: s2pu1  
 Solvent: CDCl3  
 Ambient temperature  
 GENI-300 "roesy.chem.buffalo.edu"

Relax. delay 8.000 sec  
 Pulse 39.0 degrees  
 Acq. time 1.706 sec  
 Width 18761.7 Hz  
 388 repetitions  
 OBSERVE C13, 75.4536595 MHz  
 DECOUPLE H1, 300.0754431 MHz  
 Power 1023 dB  
 continuously on  
 WALTZ-16 modulated  
 DATA PROCESSING  
 Line broadening 1.0 Hz  
 FT size 65536  
 Total time 11 hr, 22 min, 40 sec

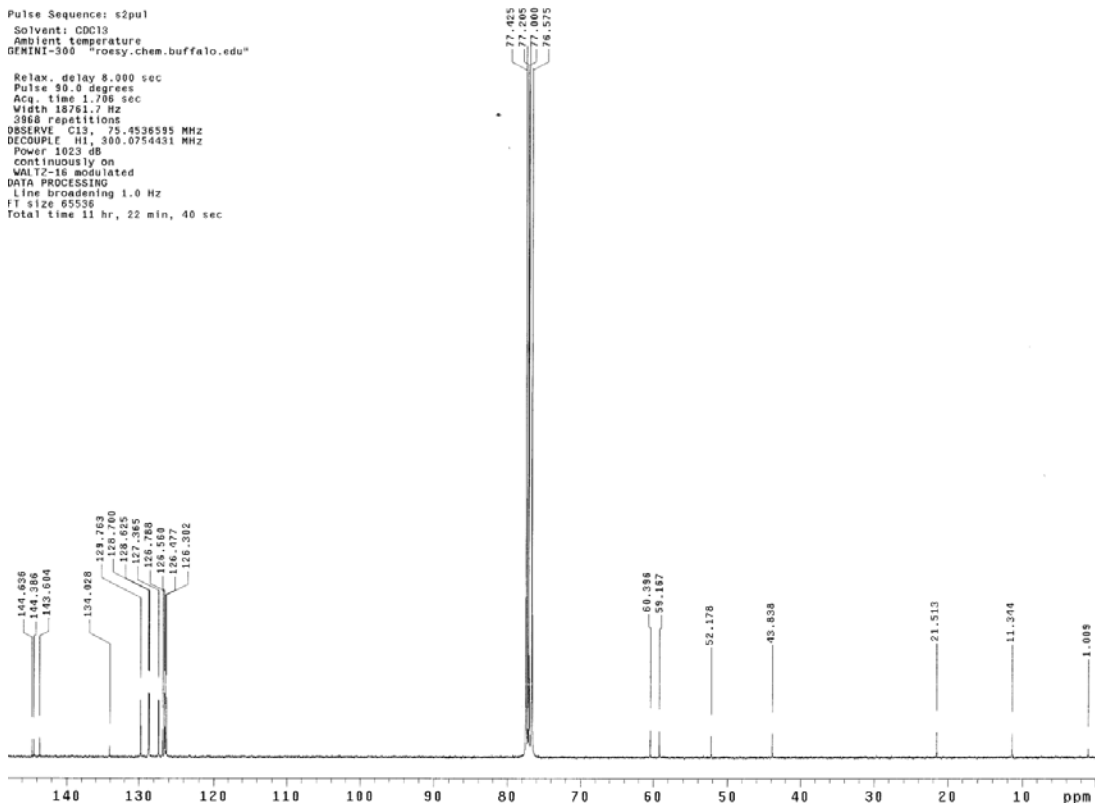

Sample Name:  
 Data Collected on:  
 chemmr400.chem.buffalo.edu-inova400  
 Archive directory:  
 Sample directory:  
 Fidfile: PROTON  
 Pulse Sequence: PROTON (s2pu1)  
 Solvent: cdcl3  
 Data collected on: Aug 5 2010

Temp. 25.0 C / 298.1 K  
 Operator: Chemier  
 Relax. delay 5.000 sec  
 Pulse 45.0 degrees  
 Acq. time 2.565 sec  
 Width 6387.7 Hz  
 8 repetitions  
 OBSERVE H1, 399.9389015 MHz  
 DATA PROCESSING  
 FT size 32768  
 Total time 0 min 29 sec

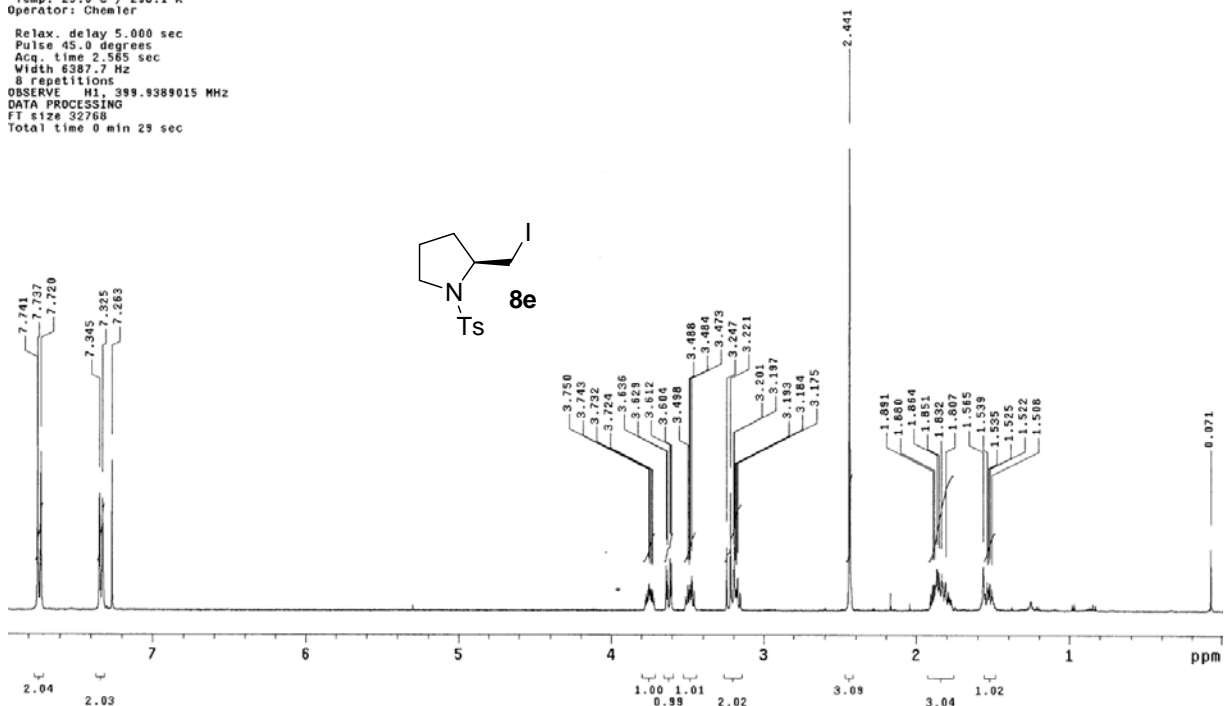

Sample Name:  
 Data Collected on:  
 roesy.chem.buffalo.edu-mercury300  
 Archive directory:  
 Sample directory:  
 Fidfile: CARBON  
 Pulse Sequence: CARBON (s2pu1)  
 Solvent: cdcl3  
 Data collected on: Aug 4 2010  
 Operator: Chemier  
 Relax. delay 10.000 sec  
 Pulse 45.0 degrees  
 Acq. time 0.868 sec  
 Width 12667.4 Hz  
 4096 repetitions  
 OBSERVE C13, 75.4536375 MHz  
 DECOUPLE H1, 399.0794430 MHz  
 Power 38 dB  
 Continuously on  
 WALTZ-16 modulated  
 DATA PROCESSING  
 Line broadening 0.5 Hz  
 FT size 32768  
 Total time 12 hr, 26 min

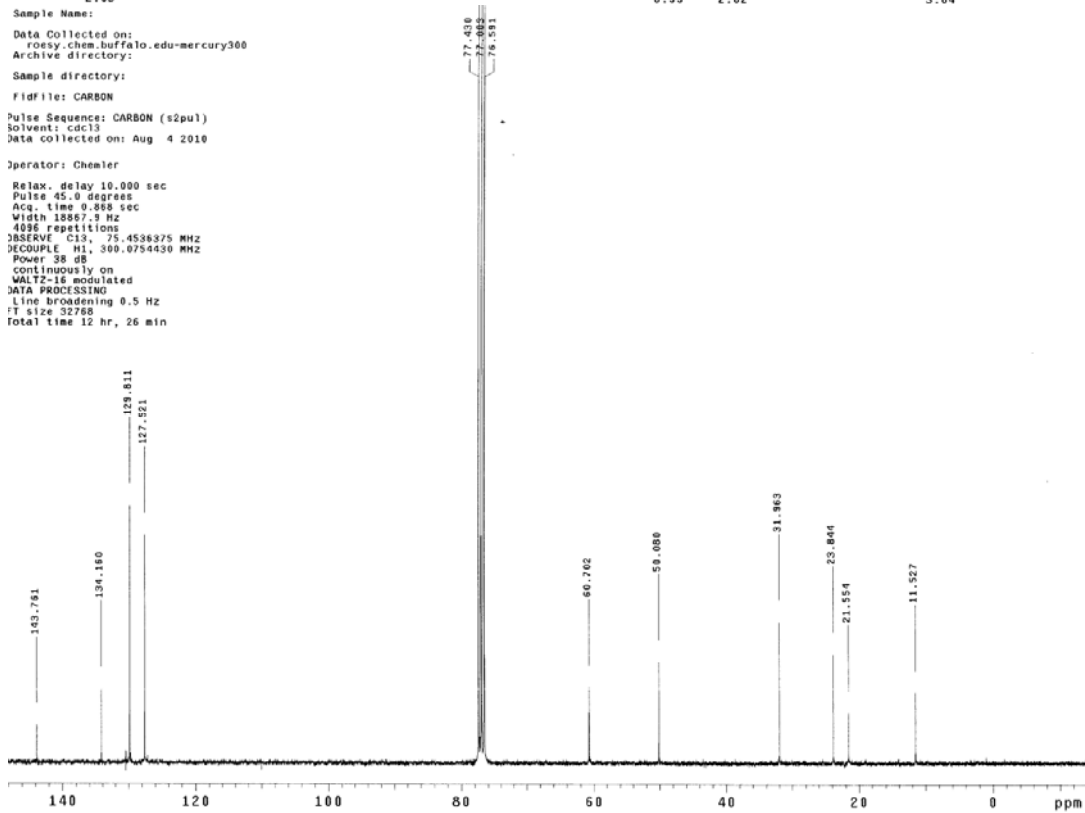

Sample Name:  
 Data Collected on:  
 chemmr400.chem.buffalo.edu-inova400  
 Archive directory:  
 Sample directory:  
 Fidfile: MIB-2-91-pg60-f20-33-prep3-r2  
 Pulse Sequence: PROTON (s2pul)  
 Solvent: cdc13  
 Data collected on: Jul 1 2011

Temp. 25.0 C / 298.1 K  
 Operator: Chemler  
 Relax. delay 2.000 sec  
 Pulse 45.0 degrees  
 Acq. time 2.585 sec  
 Width 6387.7 Hz  
 8 repetitions  
 OBSERVE H1, 399.9389023 MHz  
 DATA PROCESSING  
 FT size 32768  
 Total time 0 min 29 sec

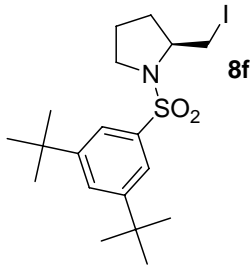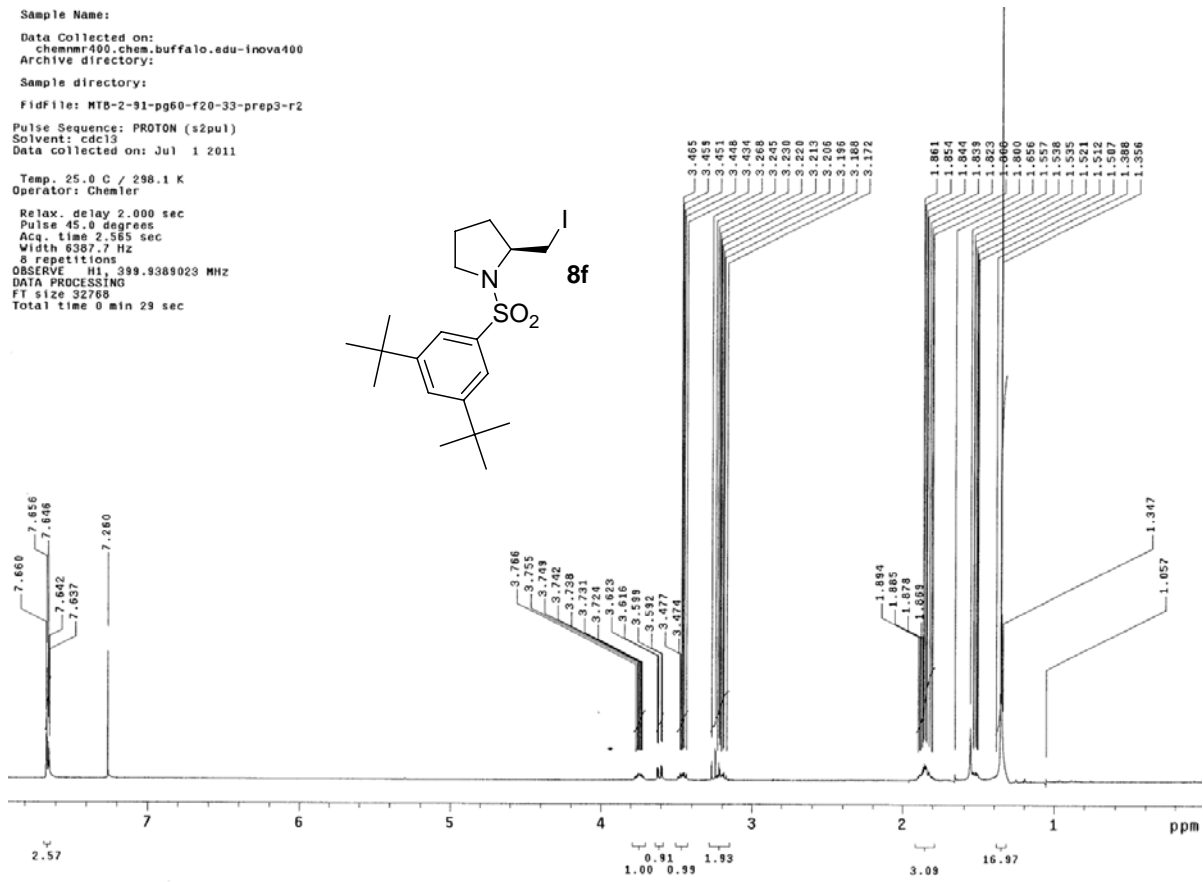

STANDARD CARBON PARAMETERS

Sample Name:  
 Data Collected on:  
 rosy.chem.buffalo.edu-mercury300  
 Archive directory:  
 Sample directory:  
 Fidfile: CARBON  
 Pulse Sequence: CARBON (s2pul)  
 Solvent: CDC13  
 Data collected on: Sep 28 2011  
 Temp. 22.0 C / 295.1 K  
 Operator: Sherry  
 Relax. delay 6.000 sec  
 Pulse 45.0 degrees  
 Acq. time 0.868 sec  
 Width 18867.3 Hz  
 4872 repetitions  
 OBSERVE C13, 75.4536375 MHz  
 DECOUPLE H1, 500.0754430 MHz  
 Power 38 dB  
 continuously on  
 WALTZ-16 modulated  
 DATA PROCESSING  
 Line broadening 0.5 Hz  
 FT size 32768  
 Total time 11 hr, 35 min

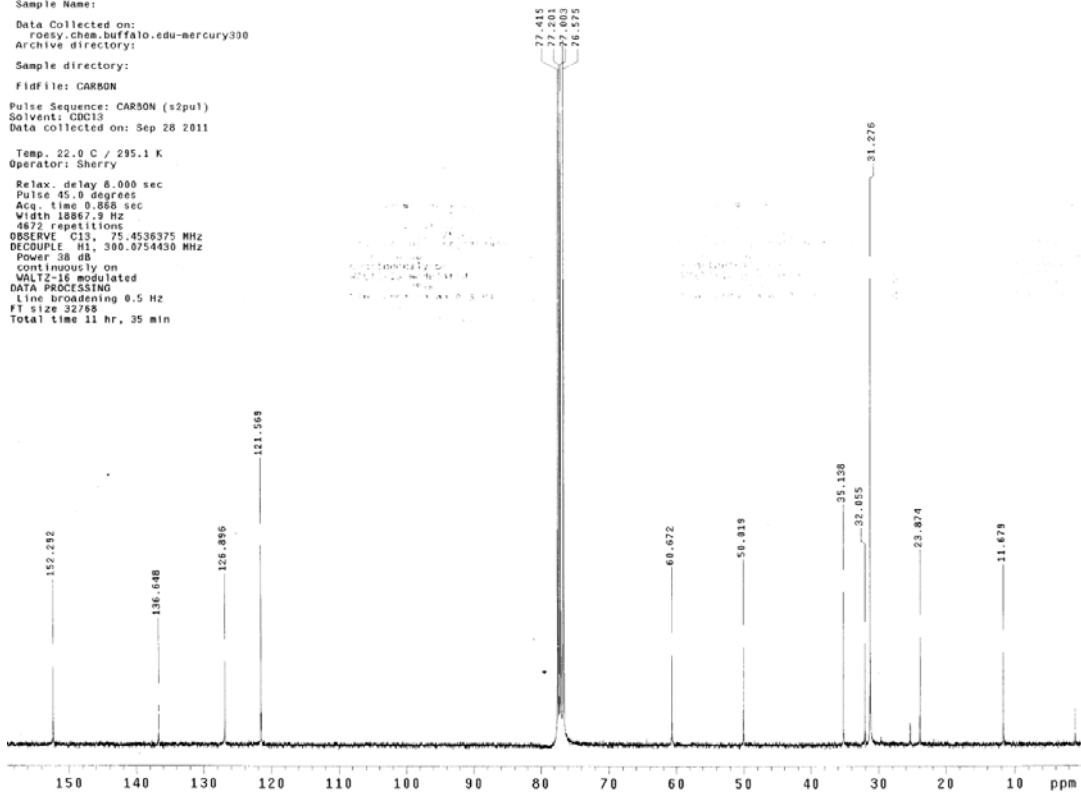

Sample Name:  
 Data Collected on:  
 Chemmr100.chem.buffalo.edu-inova400  
 Archive directory:  
 Sample directory:  
 FidFile: PROTON

Pulse Sequence: PROTON (s2pu1)  
 Solvent: cdcl3  
 Data collected on: Nov 12 2010  
 Temp. 25.0 C / 298.1 K  
 Operator: Chemler  
 Relax. delay 1.000 sec  
 Pulse 45.0 degrees  
 Acq. time 2.565 sec  
 Width 6387.7 Hz  
 8 repetitions  
 OBSERVE H1, 399.9389011 MHz  
 DATA PROCESSING  
 FT size 32768  
 Total time 0 min 29 sec

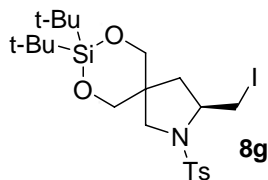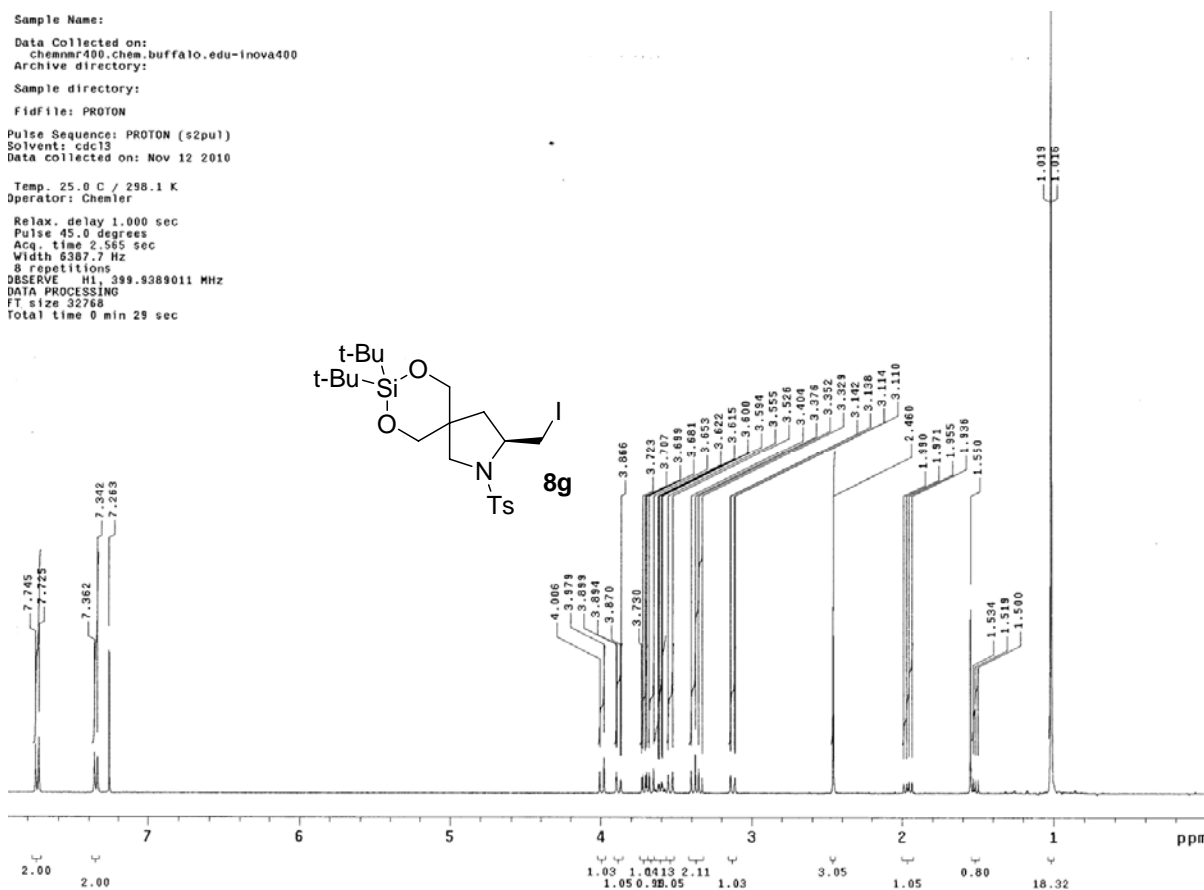

Sample Name:  
 Data Collected on:  
 Fobxy.chem.buffalo.edu-mercury300  
 Archive directory:  
 Sample directory:  
 FidFile: CARBON

Pulse Sequence: CARBON (s2pu1)  
 Solvent: cdcl3  
 Data collected on: Apr 4 2011  
 Temp. 21.0 C / 294.1 K  
 Operator: Chemler  
 Relax. delay 10.000 sec  
 Pulse 45.0 degrees  
 Acq. time 0.868 sec  
 Width 18867.9 Hz  
 3776 repetitions  
 OBSERVE C13, 75.4536375 MHz  
 DECOUPLE H1, 300.0754450 MHz  
 Power 38 dB  
 continuously on  
 WALTZ-16 modulated  
 DATA PROCESSING  
 Line broadening 0.5 Hz  
 FT size 32768  
 Total time 12 hr, 26 min

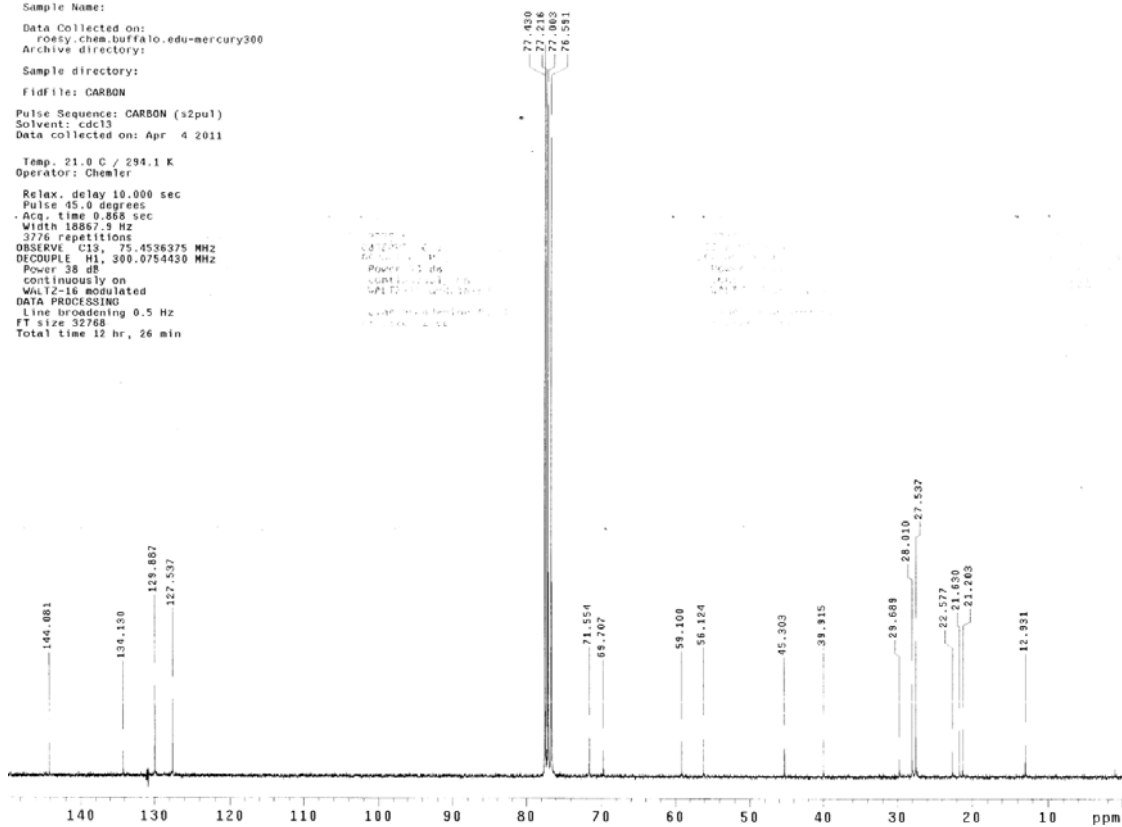



## STANDARD 1H OBSERVE

Pulse Sequence: s2pul  
 Solvent: CDCl3  
 Ambient temperature  
 INOVA-400 "cosy.chem.buffalo.edu"

Relax. delay 1.000 sec  
 Pulse 47.9 degrees  
 Acq. time 1.800 sec  
 Width 6000.6 Hz  
 16 repetitions  
 OBSERVE H1 399.9389106 MHz  
 DATA PROCESSING  
 Line broadening 0.3 Hz  
 FT size 32768  
 Total time 0 min, 44 sec

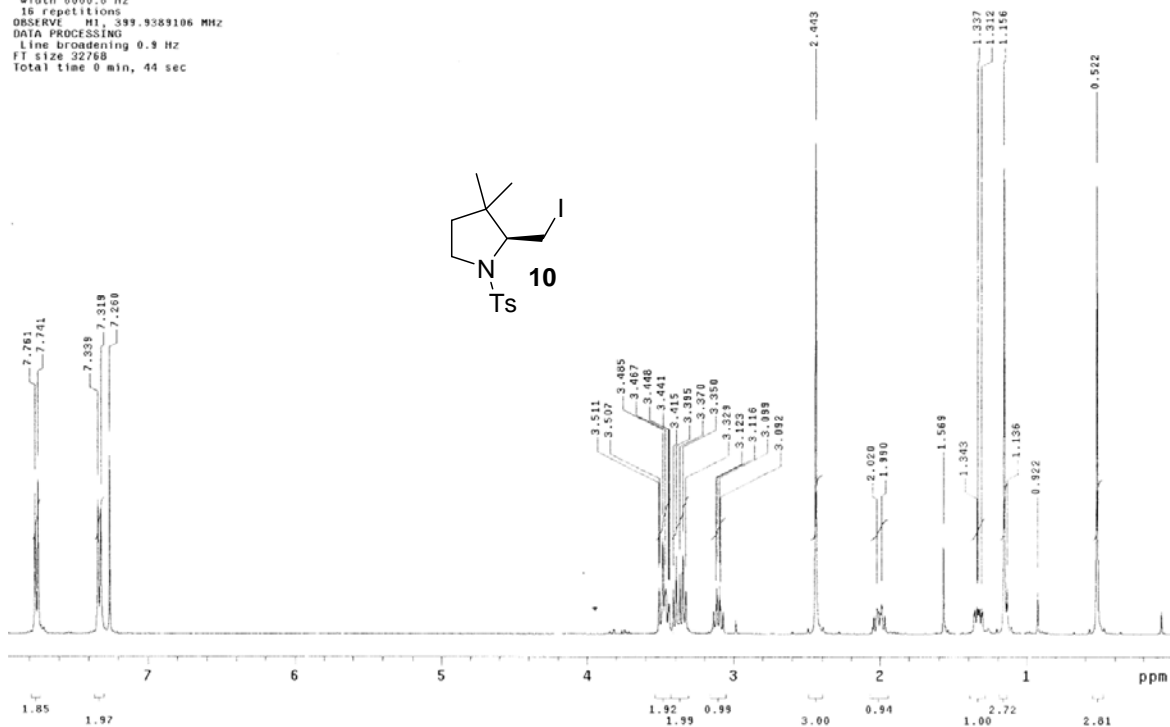

## 13C OBSERVE

Pulse Sequence: s2pul  
 Solvent: CDCl3  
 Ambient temperature  
 GENINI-300 "roesy.chem.buffalo.edu"

Relax. delay 8.000 sec  
 Pulse 90.0 degrees  
 Acq. time 1.700 sec  
 Width 18761.7 Hz  
 3872 repetitions  
 OBSERVE C13 75.4536801 MHz  
 DECOUPLE H1 300.0754431 MHz  
 Power 1023 dB  
 Continuously on  
 WALTZ-16 modulated  
 DATA PROCESSING  
 Line broadening 1.0 Hz  
 FT size 85536  
 Total time 11 hr, 22 min, 40 sec

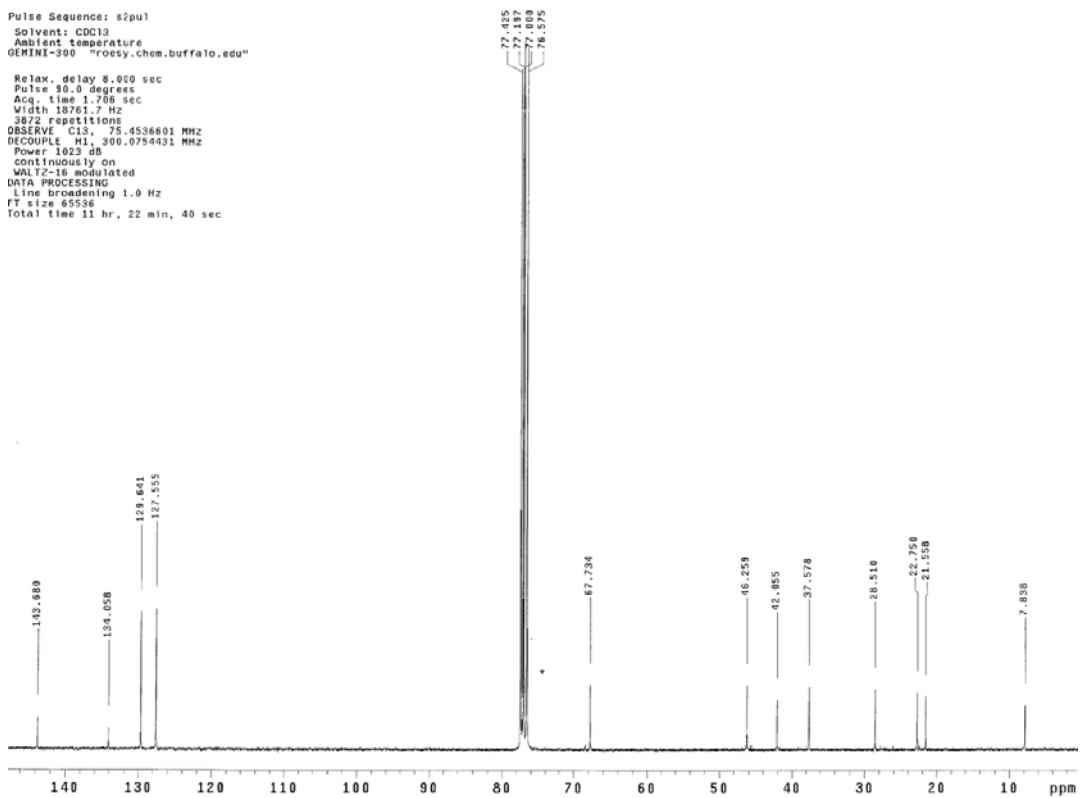

Sample Name:  
 Data Collected On:  
 chemmr400.chem.buffalo.edu-inova400  
 Archive directory:  
 Sample directory:  
 Fidfile: MTB-1-26  
 Pulse Sequence: PROTON (s2pul)  
 Solvent: cdcl3  
 Data collected on: Dec 2 2011

Temp. 25.0 C / 298.1 K  
 Operator: Chemler  
 Relax. delay 1.000 sec  
 Pulse 45.0 degrees  
 Acq. time 2.565 sec  
 Width 6387.7 Hz  
 8 repetitions  
 OBSERVE H1, 399.9389027 MHz  
 DATA PROCESSING  
 FT size 32768  
 Total time 0 min 29 sec

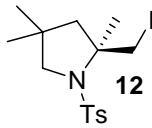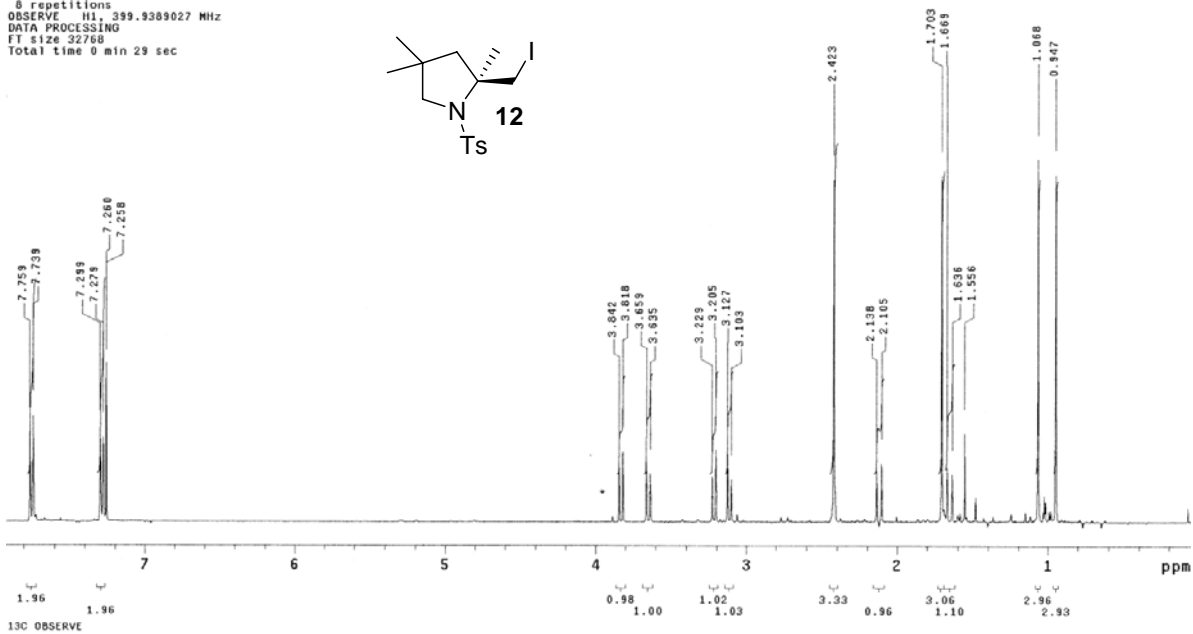

13C OBSERVE  
 Pulse Sequence: s2pul  
 Solvent: CDCl3  
 Ambient Temperature  
 GEMINI-300 "roesy.chem.buffalo.edu"  
 Relax. delay 8.000 sec  
 Pulse 90.0 degrees  
 Acq. time 1.708 sec  
 Width 18761.7 Hz  
 3968 repetitions  
 OBSERVE C13, 75.4536601 MHz  
 DECOUPLE H1, 300.0754431 MHz  
 Power 1023 dB  
 continuously on  
 WALTZ-16 modulated  
 DATA PROCESSING  
 Line broadening 1.0 Hz  
 FT size 65536  
 Total time 11 hr, 22 min, 40 sec

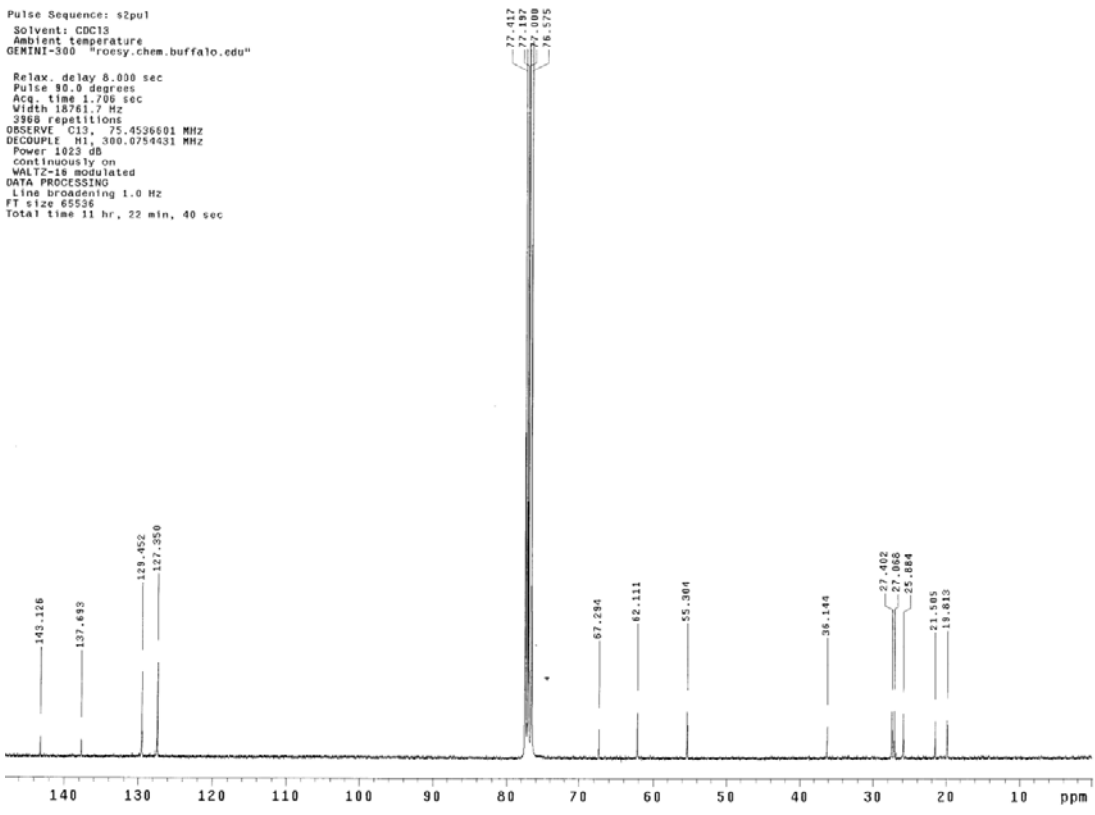

Pulse Sequence: s2pul  
 Solvent: CDCl3  
 Ambient temperature  
 INOVA-400 "cosy.chem.buffalo.edu"

Relax. delay 1.000 sec  
 Pulse 47.5 degrees  
 Acq. time 1.600 sec  
 Width 6000.6 Hz  
 16 repetitions  
 OBSERVE H1, 399.9389099 MHz  
 DATA PROCESSING  
 Line broadening 0.9 Hz  
 FT size 32788  
 Total time 0 min, 44 sec

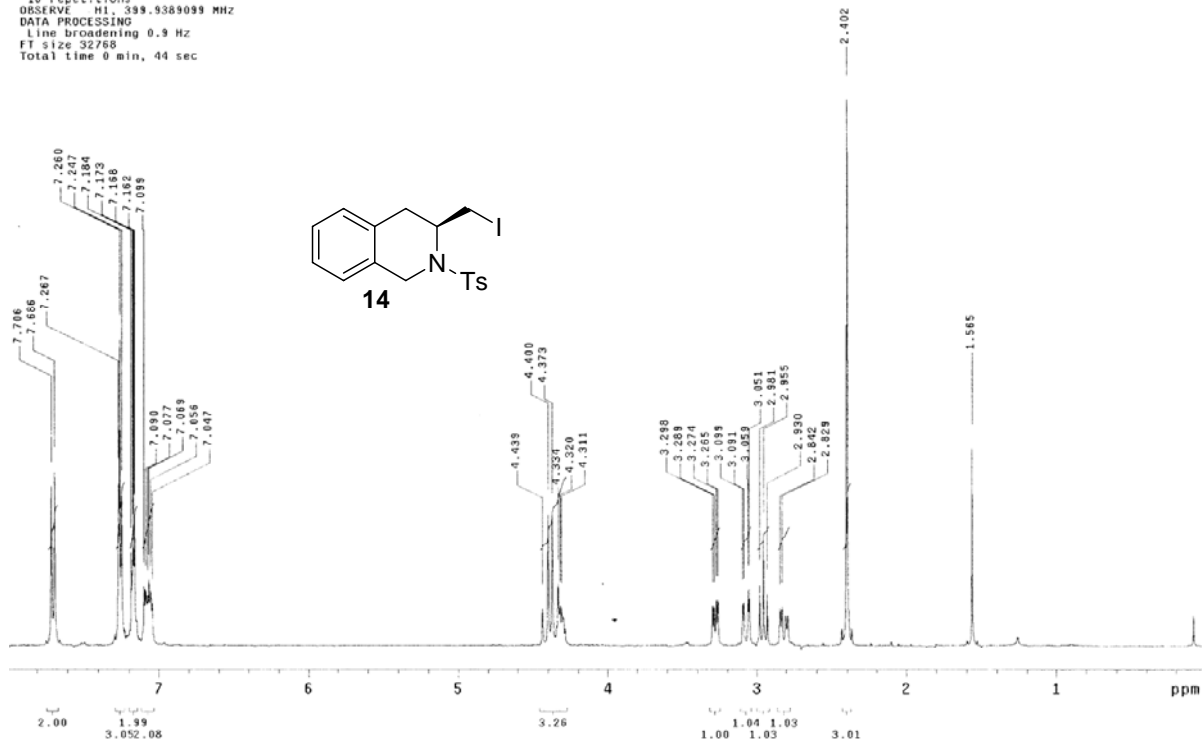

13C OBSERVE

Pulse Sequence: s2pul  
 Solvent: CDCl3  
 Ambient temperature  
 GEMINI-300 "rossy.chem.buffalo.edu"

Relax. delay 8.000 sec  
 Pulse 90.0 degrees  
 Acq. time 1.700 sec  
 Width 10761.7 Hz  
 3888 repetitions  
 OBSERVE C13, 75.4536589 MHz  
 DECOUPLE H1, 300.0754431 MHz  
 Power 1023 db  
 continuously on  
 WALTZ-16 modulated  
 DATA PROCESSING  
 Line broadening 1.0 Hz  
 FT size 65536  
 Total time 11 hr, 22 min, 40 sec

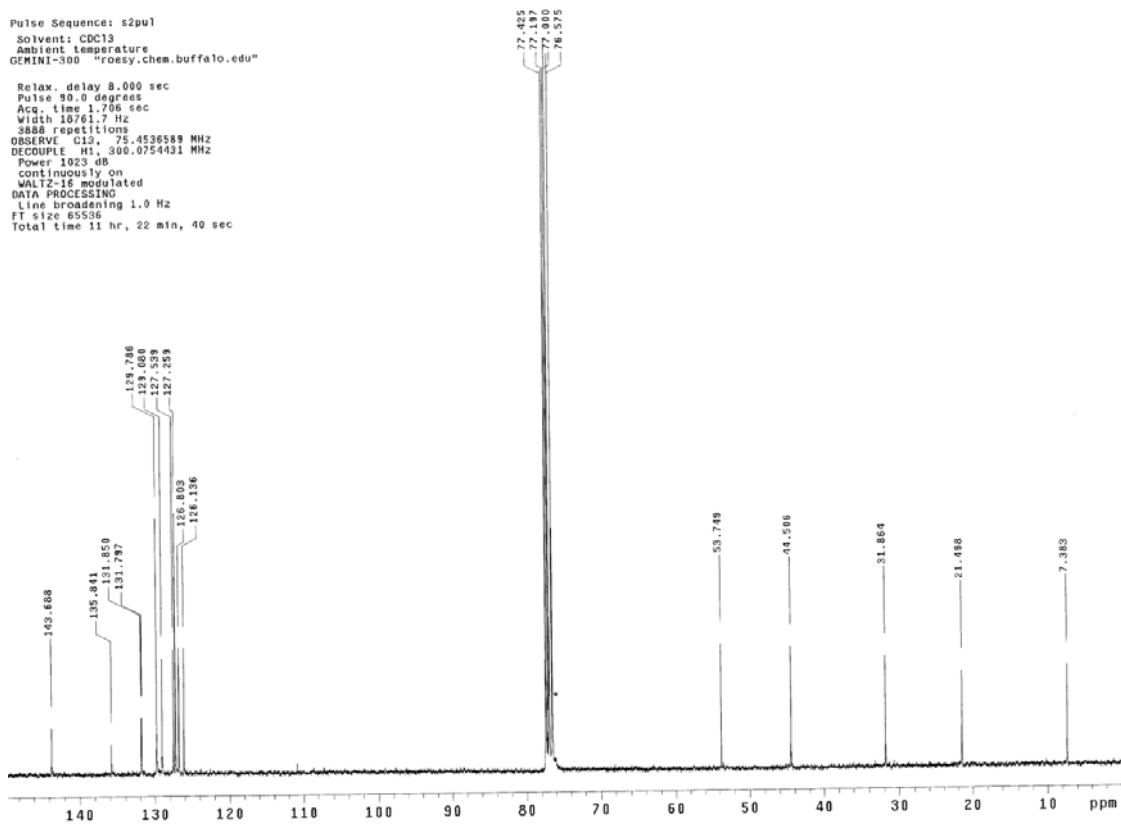

Sample Name:  
 Data Collected on:  
 chemmr400.chem.buffalo.edu-inova400  
 Archive directory:  
 Sample directory:  
 FidFile: PROTON

Pulse Sequence: PROTON (s2pu1)  
 Solvent: cdcl3  
 Data collected on: Oct 25 2011

Temp. 25.0 C / 298.1 K  
 Operator: Chemler  
 Relax. delay 5.000 sec  
 Pulse 45.0 degrees  
 Acq. time 20:58:00  
 Width 6387.7 Hz  
 8 repetitions  
 OBSERVE H1, 399.828502  
 DATA PROCESSING  
 Line broadening 1.0 Hz  
 FT size 32768  
 Total time 0 min 29 sec

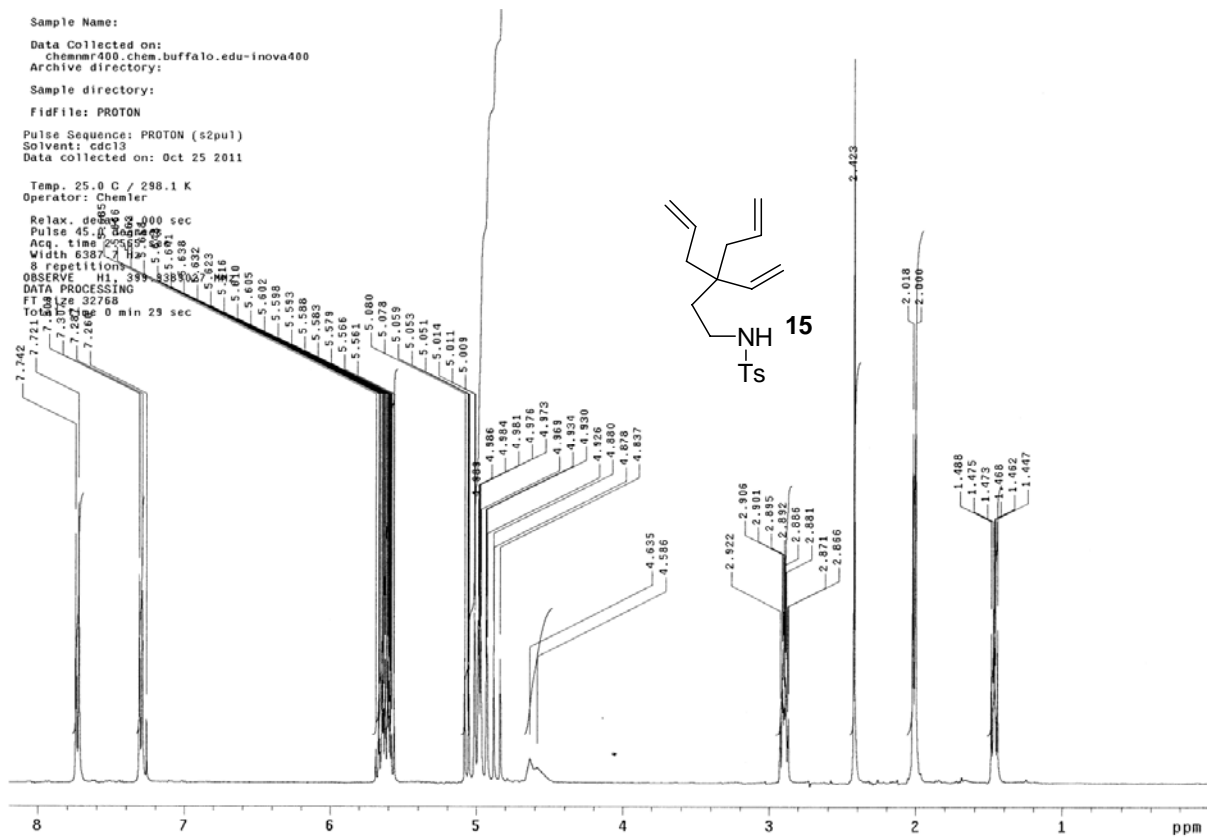

Sample Name:  
 Archive directory:  
 Sample directory:  
 FidFile: 20091023diallylsubstrateC13

Pulse Sequence: std13C (s2pu1)  
 Solvent: CDCl3  
 Data collected on: Oct 23 2009

Operator: Sherry  
 Mercury-300BB "roesy.chem.buffalo.edu"

Relax. delay 5.000 sec  
 Pulse 90.0 degrees  
 Acq. time 1.708 sec  
 Width 19781.7 Hz  
 4472 repetitions  
 OBSERVE C13, 75.4536599 MHz  
 RECOMP H1, 399.0754431 MHz  
 Power 1023 dB  
 continuously on  
 WALTZ-16 modulated  
 DATA PROCESSING  
 Line broadening 1.0 Hz  
 FT size 85328  
 Total time 2009781 hr, 11 min

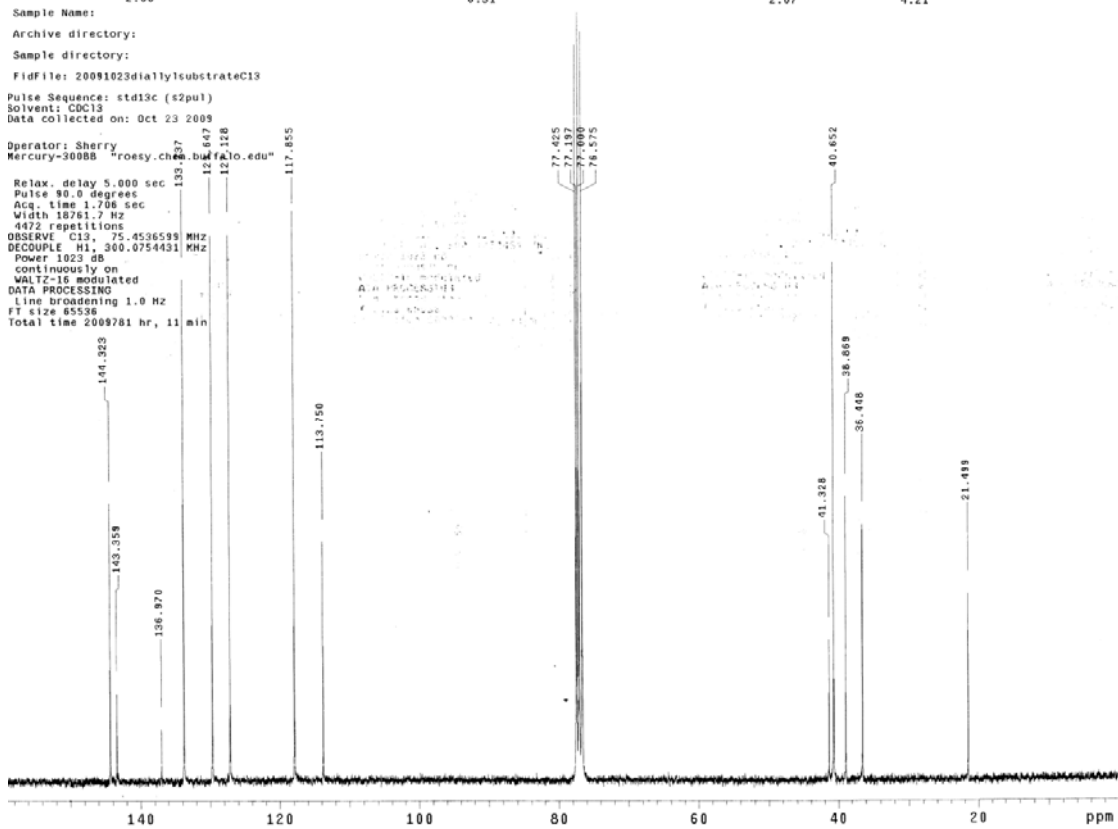

Sample Name:  
 Data Collected on:  
 chemmr400.chem.buffalo.edu-inova400  
 Archive directory:

Sample directory:  
 Fidfile: PROTON

Pulse Sequence: PROTON (s2pu1)  
 Solvent: cdcl3  
 Data collected on: Aug 24 2010

Temp. 25.0 C 7 298.1 K  
 Operator: Chemler

Relax. delay 2.000 sec  
 Pulse 45.0 degrees  
 Acq. time 2.565 sec  
 Width 8387.7 Hz  
 8 repetitions  
 OBSERVE H1, 399.9389019 MHz  
 DATA PROCESSING  
 FT size 32768  
 Total time 0 min 29 sec

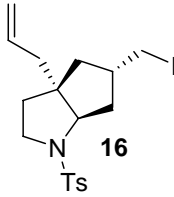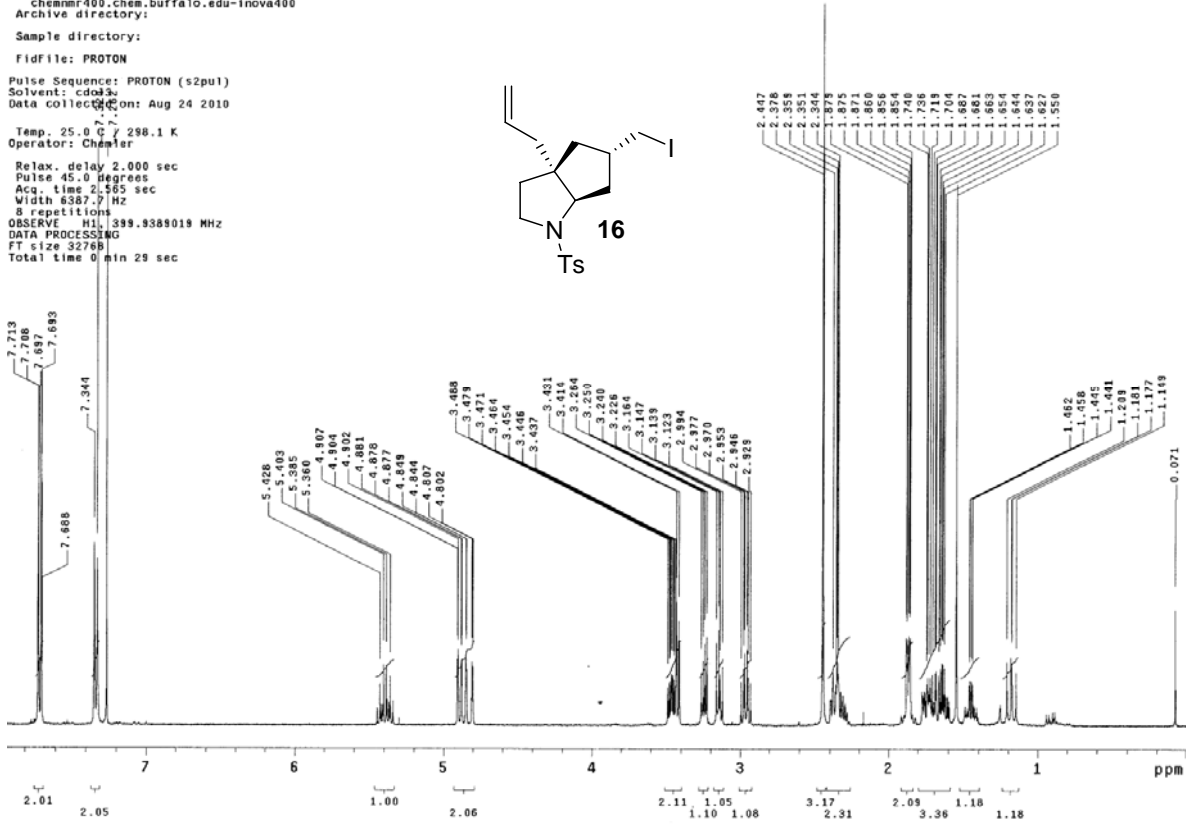

Sample Name:  
 Data Collected on:  
 roesy.chem.buffalo.edu-mercury300  
 Archive directory:

Sample directory:  
 Fidfile: CARBON

Pulse Sequence: CARBON (s2pu1)  
 Solvent: cdcl3  
 Data collected on: Aug 23 2010

Operator: Chemler

Relax. delay 10.000 sec  
 Pulse 45.0 degrees  
 Acq. time 0.888 sec  
 Width 18897.9 Hz  
 3584 repetitions  
 OBSERVE C13, 75.4536375 MHz  
 DECOUPLE H1, 300.0754480 MHz  
 Power 38 db  
 Continuously on  
 WALTZ-16 modulated  
 DATA PROCESSING  
 Line broadening 0.5 Hz  
 FT size 32768  
 Total time 12 hr, 26 min

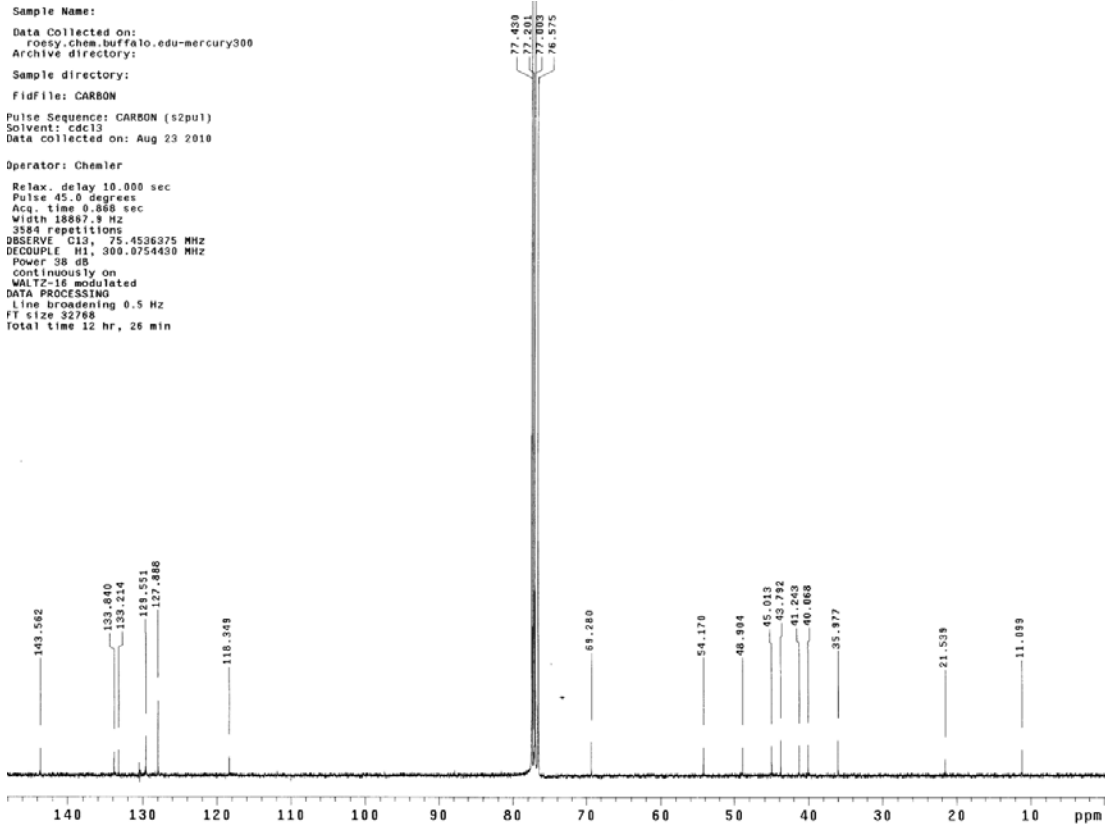

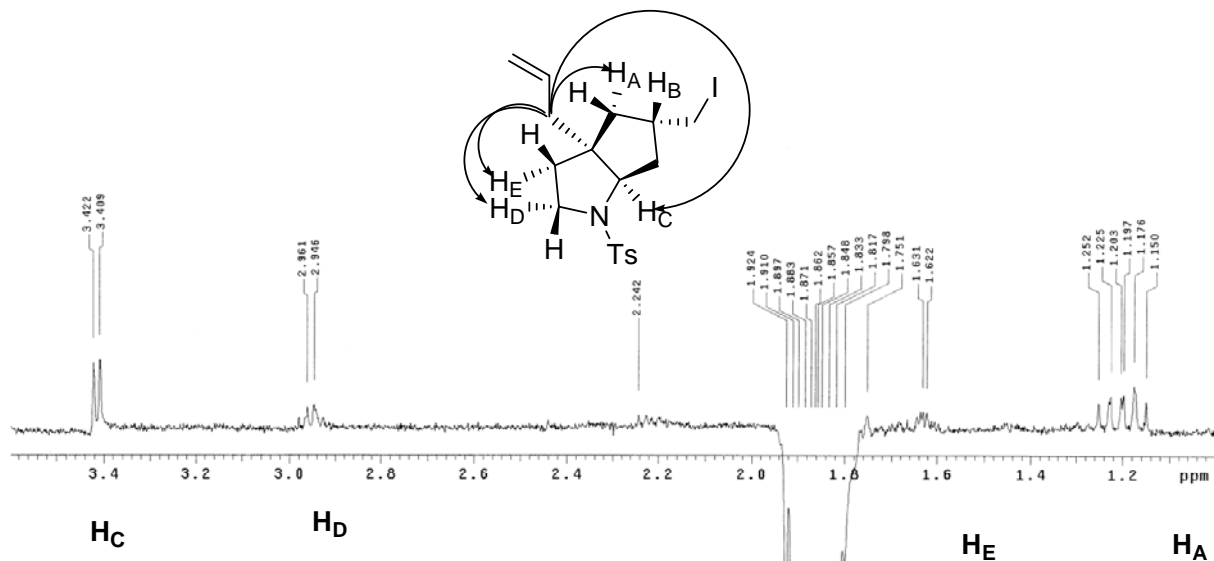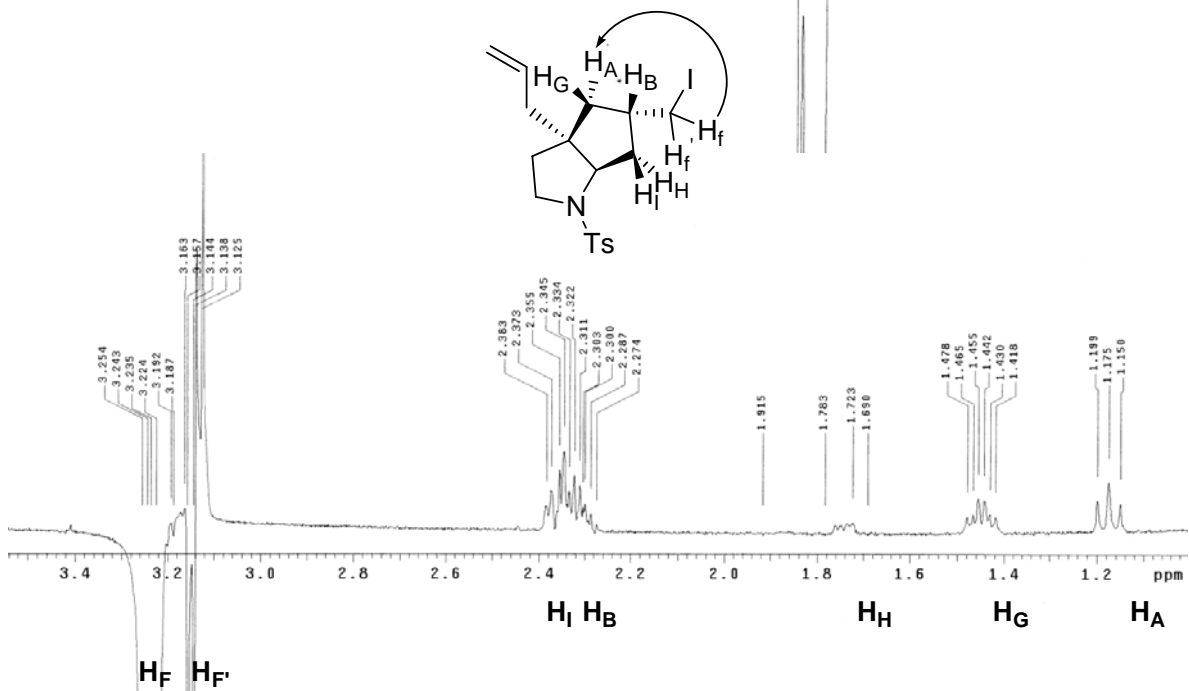

Sample Name:  
 Data Collected on:  
 chemmr400.chem.buffalo.edu-inova400  
 Archive directory:  
 Sample directory:  
 FidFile: PROTON  
 Pulse Sequence: PROTON (s2pul)  
 Solvent: cdcl3  
 Data collected on: Dec 5 2011  
 Temp. 25.0 C / 298.1 K  
 Operator: Chemler  
 Relax. delay 2.000 sec  
 Pulse 45.0 degrees  
 Acq. time 2.565 sec  
 Width 6387.7 Hz  
 8 repetitions  
 OBSERVE H1, 399.9389019 MHz  
 DATA PROCESSING  
 FT size 32768  
 Total time 0 min 29 sec

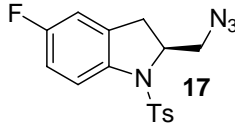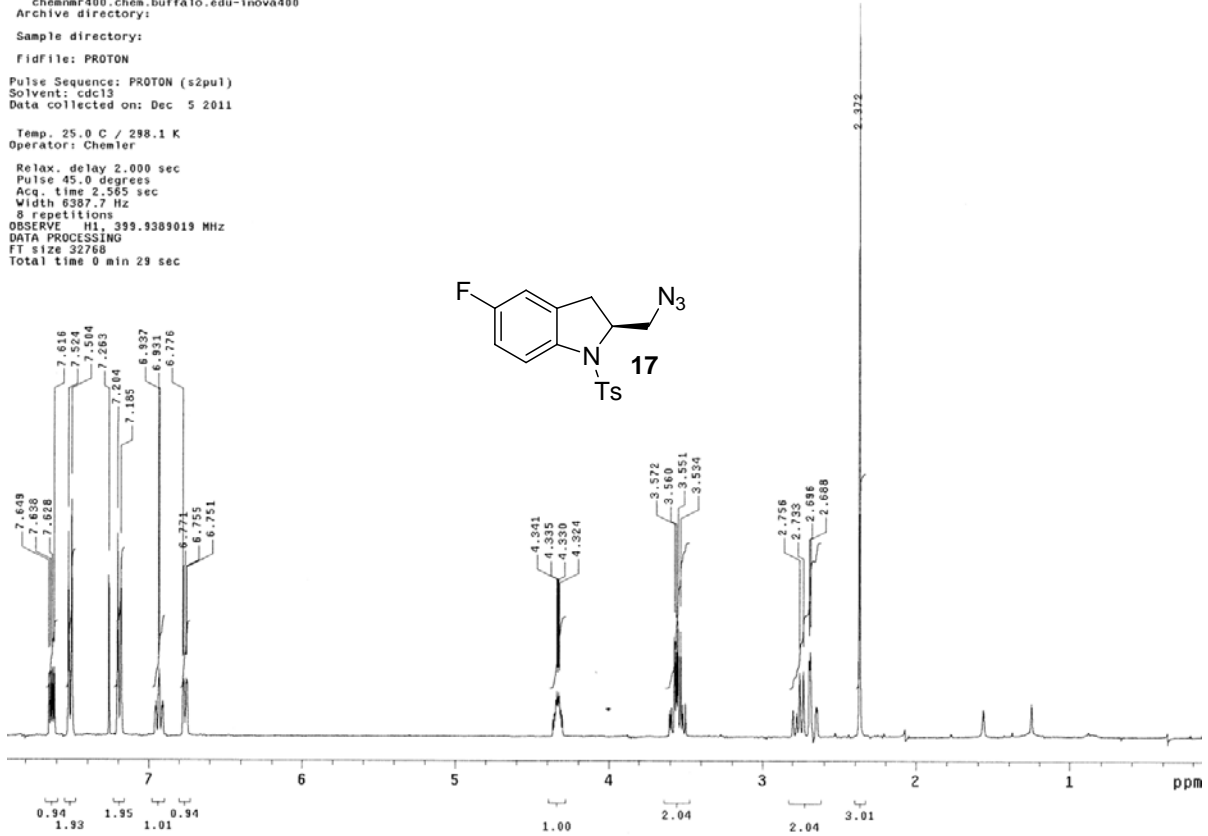

Sample Name:  
 Data Collected on:  
 roesy.chem.buffalo.edu-mercury300  
 Archive directory:  
 Sample directory:  
 FidFile: CARBON  
 Pulse Sequence: CARBON (s2pul)  
 Solvent: cdcl3  
 Data collected on: Sep 12 2011  
 Temp. 22.0 C / 295.1 K  
 Operator: Chemler  
 Relax. delay 8.000 sec  
 Pulse 45.0 degrees  
 Acq. time 9.868 sec  
 Width 18867.9 Hz  
 4808 repetitions  
 OBSERVE C13, 75.4536366 MHz  
 DECOUPLE H1, 300.0754430 MHz  
 Power 38 dB  
 continuously on  
 WALTZ-16 modulated  
 DATA PROCESSING  
 Line broadening 0.5 Hz  
 FT size 32768  
 Total time 11 hr, 26 min

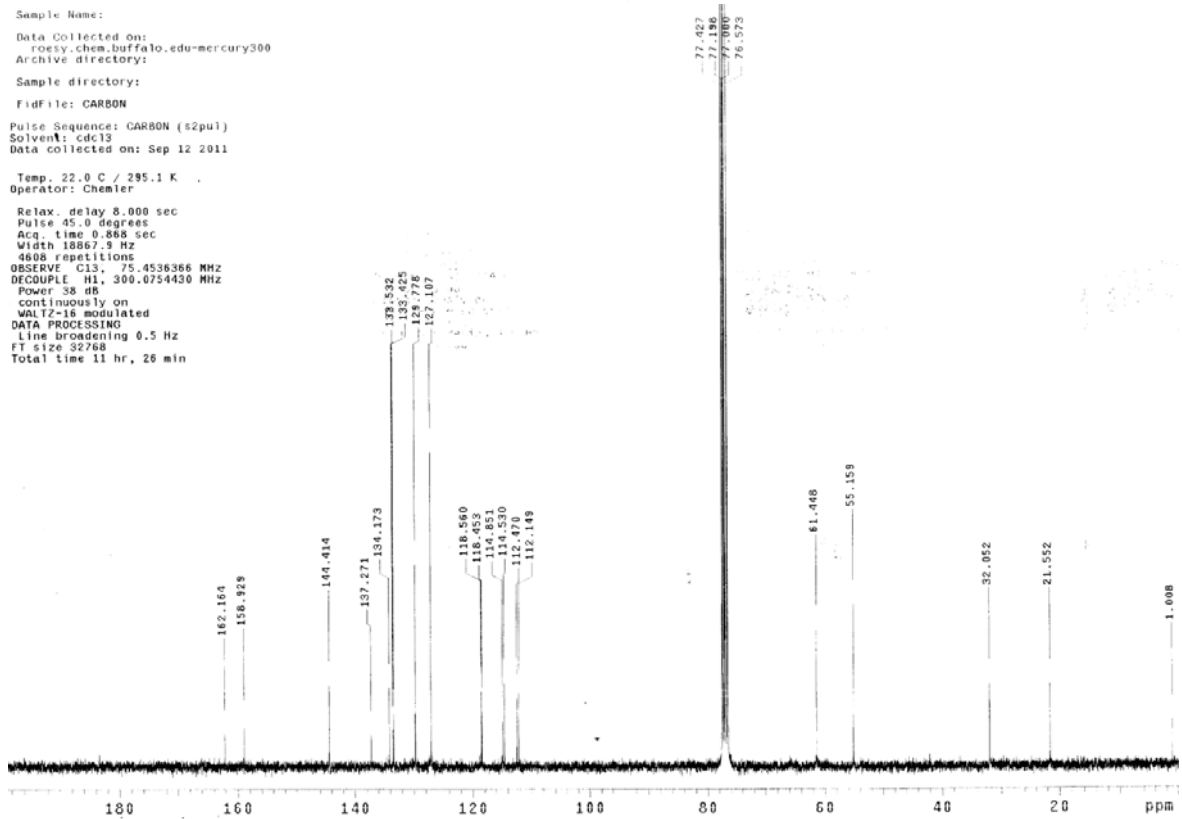

Sample Name:  
 Data Collected on:  
 chemnar400.chem.buffalo.edu-inova400  
 Archive directory:  
 Sample directory:  
 FidFile: PROTON  
 Pulse Sequence: PROTON (s2pul)  
 Solvent: cdcl3  
 Data collected on: Sep 14 2011  
 Temp. 25.0 C / 298.1 K  
 Operator: Chemjet  
 Relax. delay 2.000 sec  
 Pulse 45.0 degrees  
 Acq. time 2.565 sec  
 Width 43877 Hz  
 8 repetitions  
 OBSERVE H1, 399.9389026 MHz  
 DATA PROCESSING  
 FT size 32768  
 Total time 0 min 29 sec

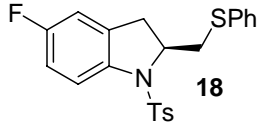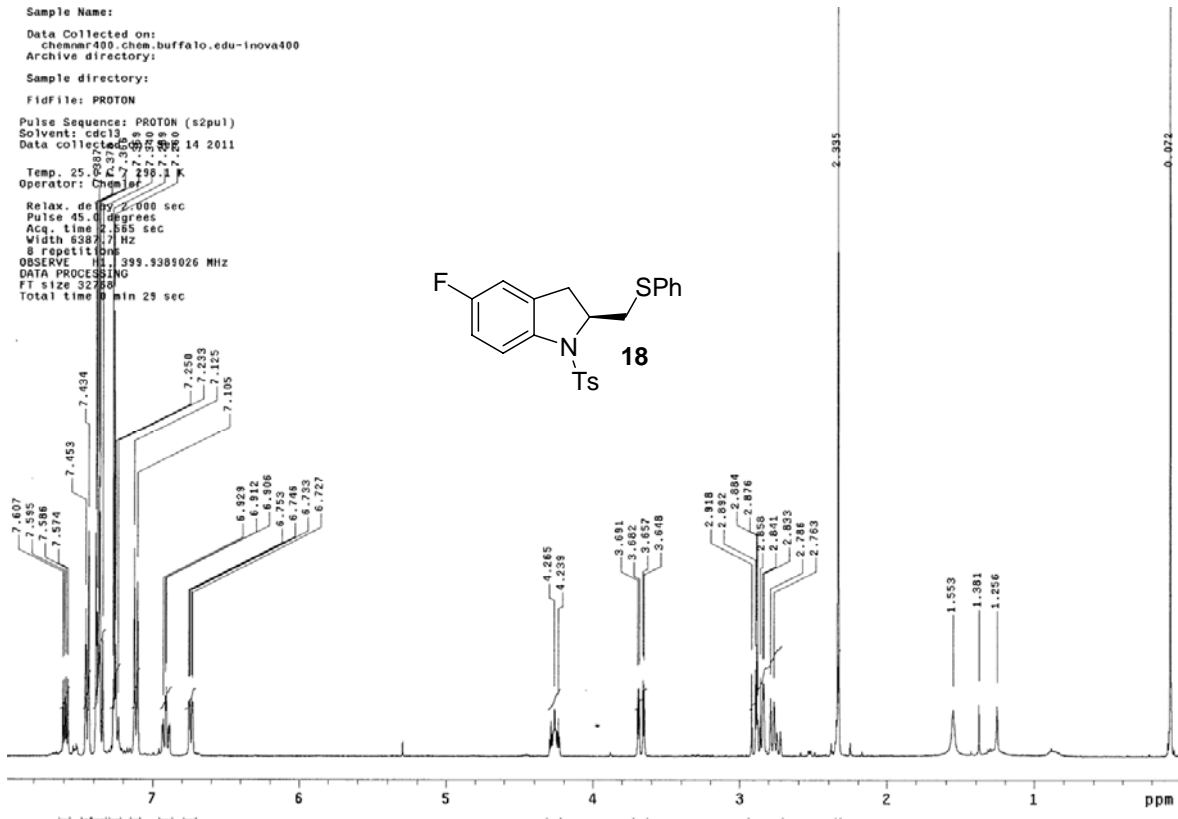

Sample Name:  
 Data Collected on:  
 roesy.chem.buffalo.edu-mercury300  
 Archive directory:  
 Sample directory:  
 FidFile: CARBON  
 Pulse Sequence: CARBON (s2pul)  
 Solvent: cdcl3  
 Data collected on: Sep 22 2011  
 Temp. 22.0 C / 295.1 K  
 Operator: Chemjet  
 Relax. delay 8.000 sec  
 Pulse 45.0 degrees  
 Acq. time 0.868 sec  
 Width 18867.9 Hz  
 4608 repetitions  
 OBSERVE C13, 75.4536375 MHz  
 DECOUPLE H1, 300.0754430 MHz  
 Power 38 dB  
 continuously on  
 WALTZ-16 modulated  
 DATA PROCESSING  
 Line broadening 0.5 Hz  
 FT size 32768  
 Total time 11 hr, 26 min

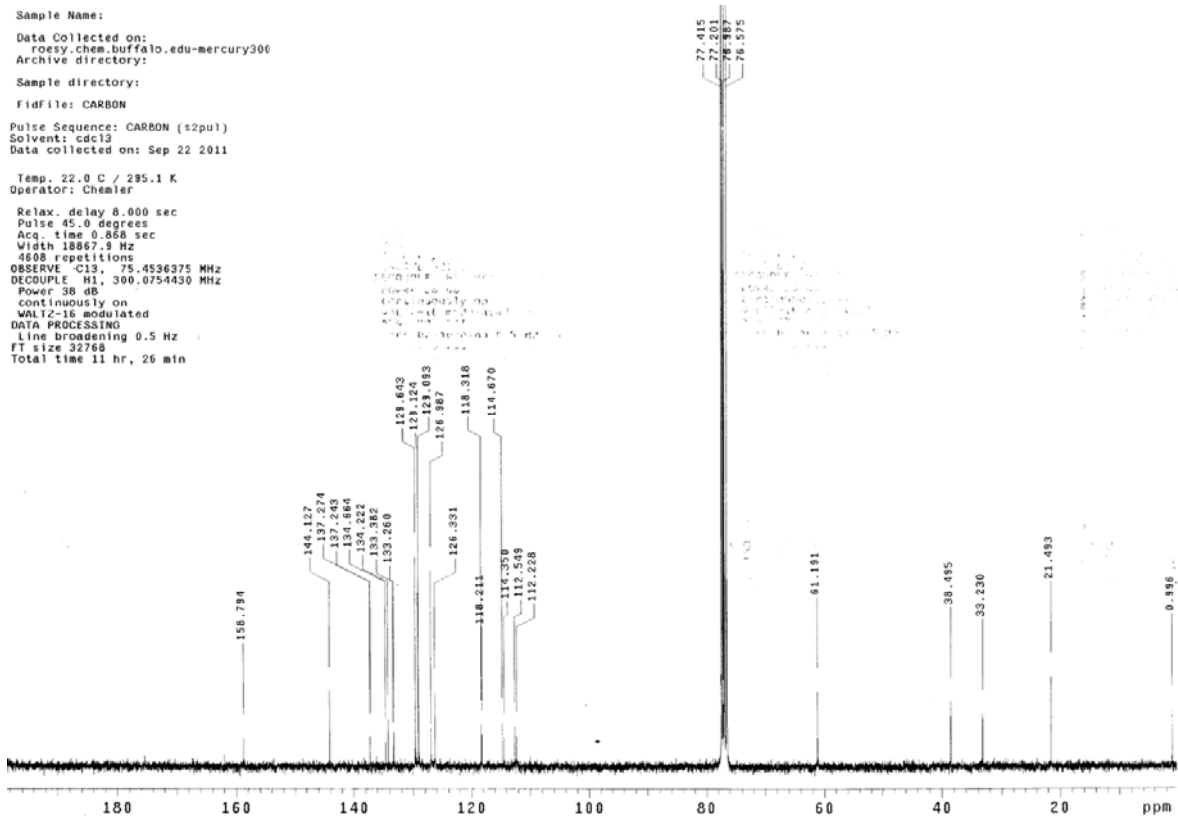



Sample Name:  
 Data Collected on:  
 chemmr400.chem.buffalo.edu-inova400  
 Archive directory:  
 Sample directory:  
 Fidfile: PROTON  
 Pulse Sequence: PROTON (s2pu1)  
 Solvent: cdcl3  
 Data collected on: Aug 18 2011

Temp. 25.0 C / 298.1 K  
 Operator: Chemler  
 Relax. delay 2.000 sec  
 Pulse 45.0 degrees  
 Acq. time 2.565 sec  
 Width 6387.7 Hz  
 8 repetitions  
 OBSERVE H1, 399.9389026 MHz  
 DATA PROCESSING  
 FT size 32768  
 Total time 0 min 29 sec

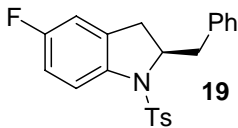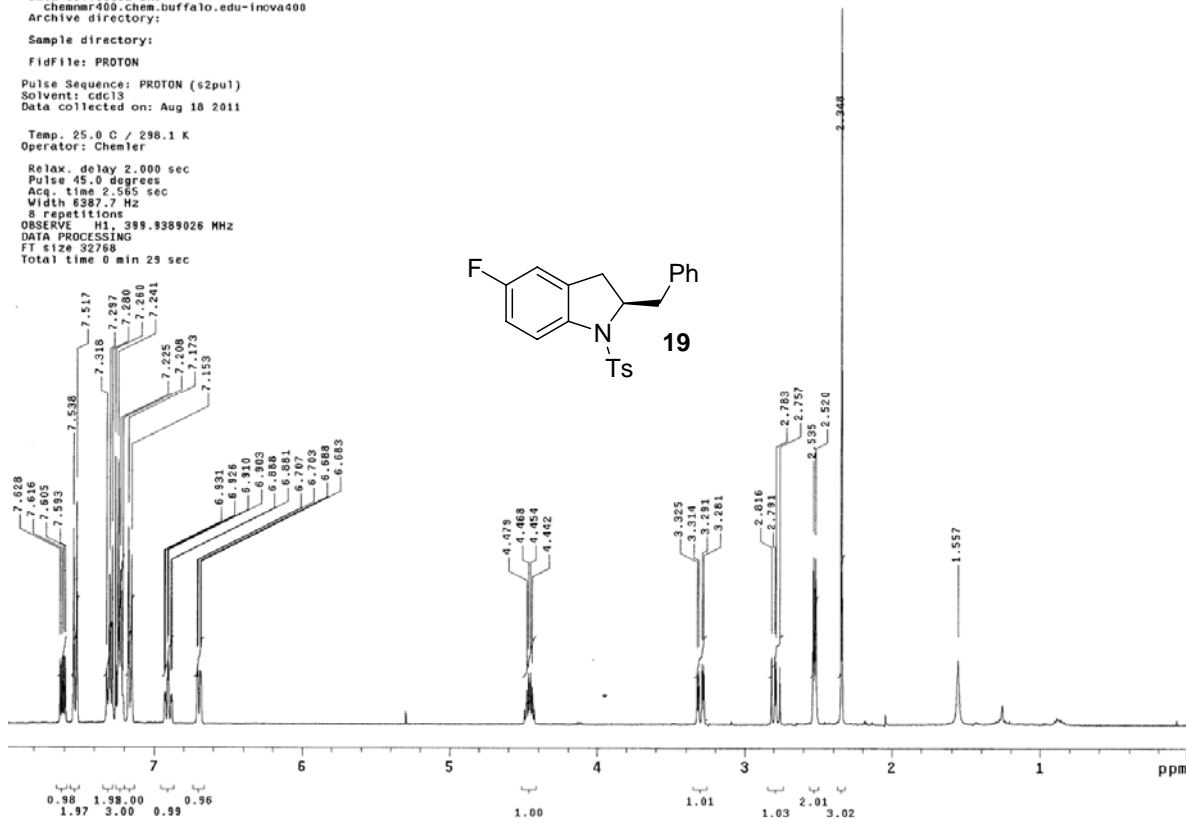

STANDARD CARBON PARAMETERS

Sample Name:  
 Data Collected on:  
 roesy.chem.buffalo.edu-mercury300  
 Archive directory:  
 Sample directory:  
 Fidfile: CARBON  
 Pulse Sequence: CARBON (s2pu1)  
 Solvent: cdcl3  
 Data collected on: Sep 6 2011

Temp. 26.3 C / 299.4 K  
 Operator: Chemler  
 Relax. delay 8.000 sec  
 Pulse 45.0 degrees  
 Acq. time 8.868 sec  
 Width 18867.9 Hz  
 328 repetitions  
 OBSERVE C13, 75.4536375 MHz  
 DECOUPLE H1, 300.0754430 MHz  
 Power 38 dB  
 Continuously on  
 WALTZ-16 modulated  
 DATA PROCESSING  
 Line broadening 0.5 Hz  
 FT size 32768  
 Total time 12 hr, 42 min

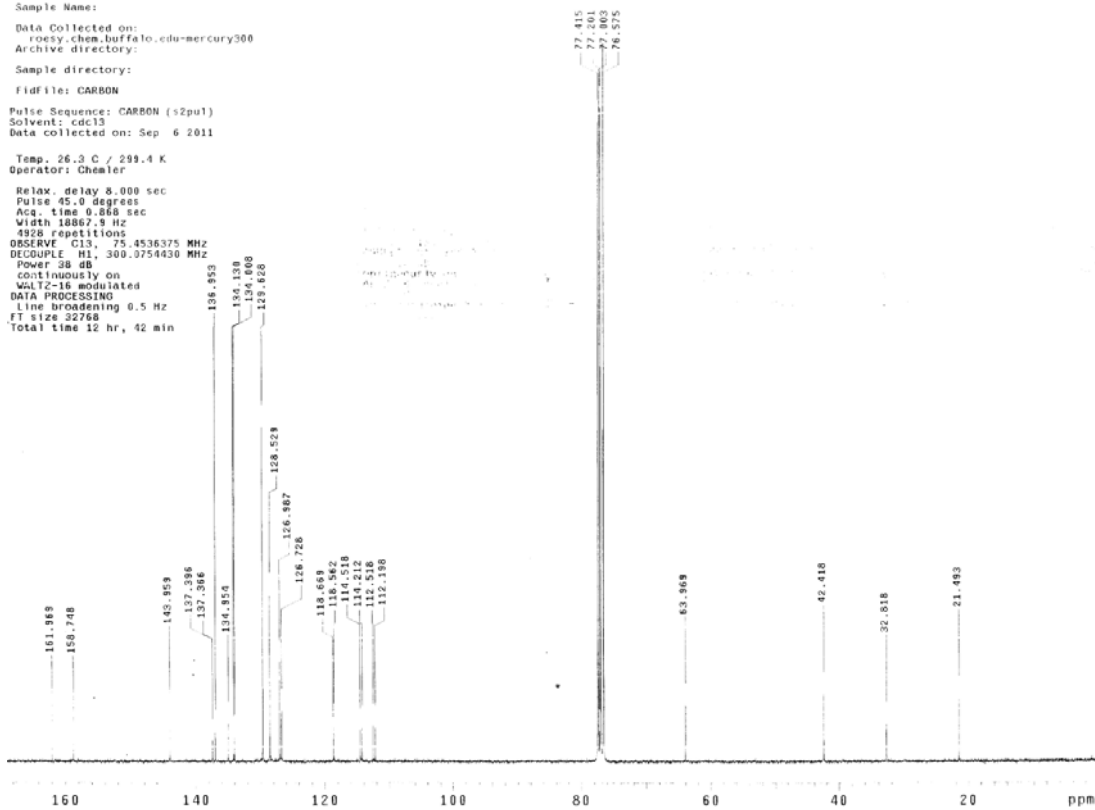

Supplement: NIHMS362194-supplement-Array.pdf [file NIHMS362194-supplement-Array.pdf]
